# Supplementary material for: Treatment with a Cholecystokinin Receptor Antagonist, Proglumide, Improves Efficacy of Immune Checkpoint Antibodies in Hepatocellular Carcinoma
Source: MDPI journal article supplement (doi:10.3390/ijms24043625), 2023-02-11
Supplement: s1 [file s1]

## **Supplemental Materials Table of Contents**

**Supplemental Figure S1.** Dissociation curves analysis of qPCR amplification for mouse CCK-BR and gastrin genes.

**Supplemental Figure S2.** Representative dissociation curve analysis of qPCR amplification for different genes using total RNA from mouse tumors.

**Supplemental Figure S3.** Gene interaction network map for hepatic fibrosis signaling pathway.

**Supplemental Table S1:** Raw Ct Data and calculation of relative expression data from the raw Ct data.

**Supplemental Table S2:** Effect of Proglumide treatment on gene expression in Hepa1-6 cells after 8 hrs and 24 hrs at 20 nM and 40 nM dose.

**Supplemental Table S3:** Up-regulated genes by RNAseq control versus proglumide treated HepG2 human HCC cells.

**Supplemental Table S4:** Down-regulated genes by RNAseq control versus proglumide treated HepG2 human HCC cells.

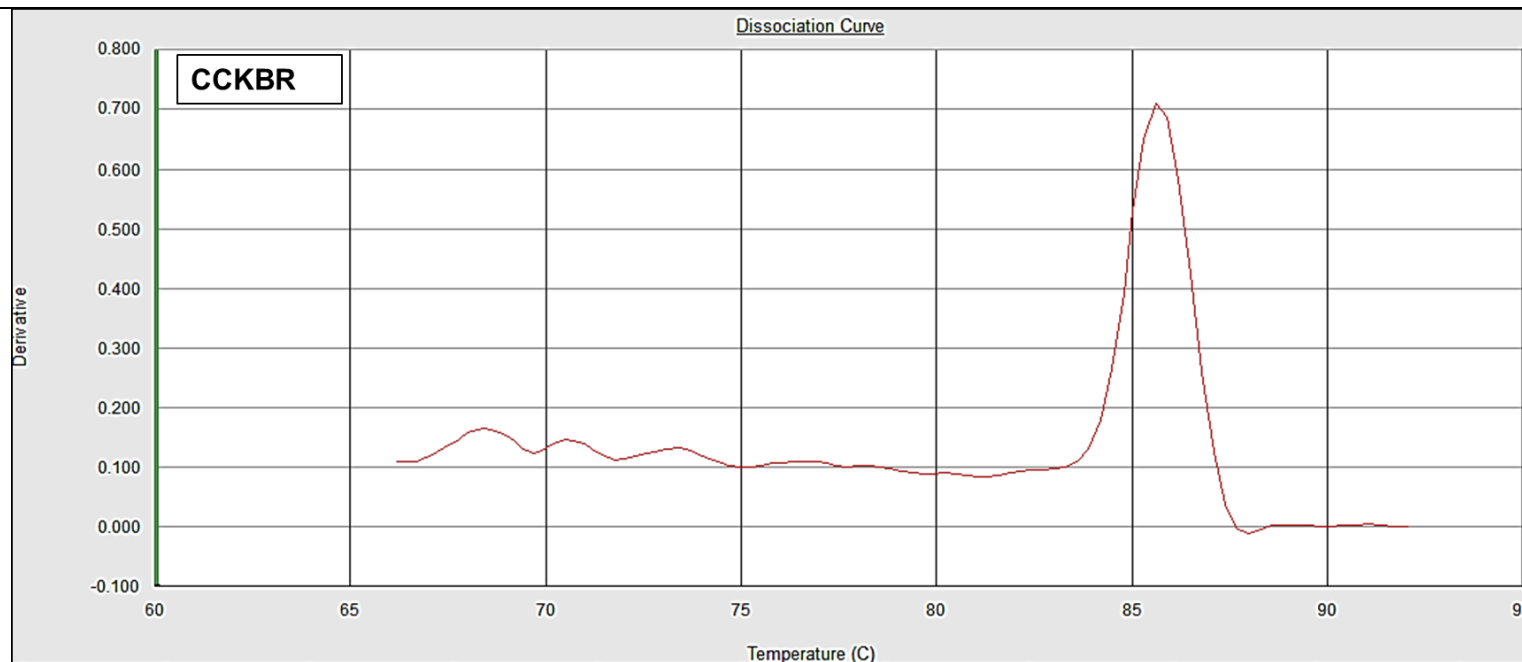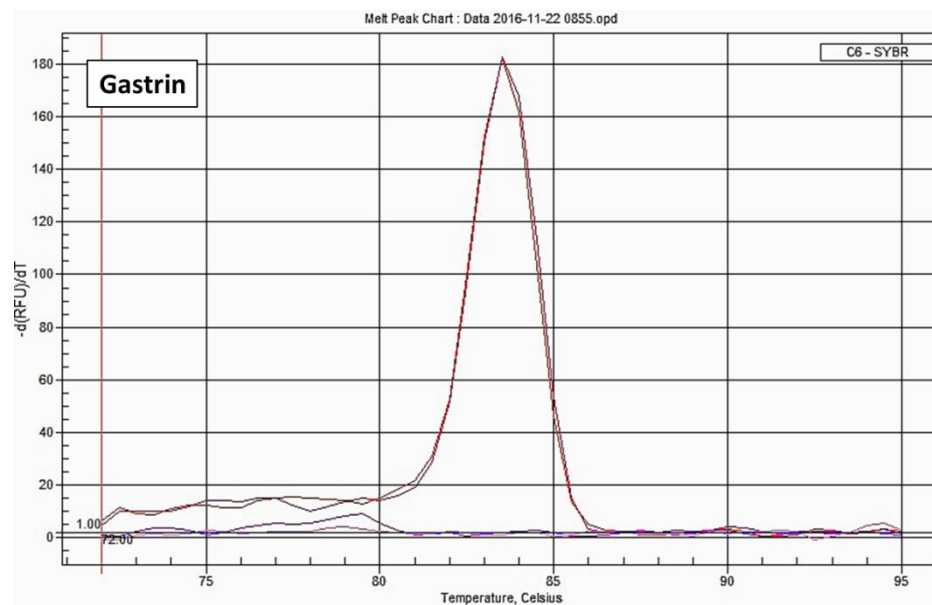

Provided by GeneCopoeia, Inc.  
Cat # MQP02920

**Supplemental Figure S1.** Dissociation curve analysis of qPCR amplification for mouse CCK-BR and mouse gastrin (for Figure 1).

*Zeb1*

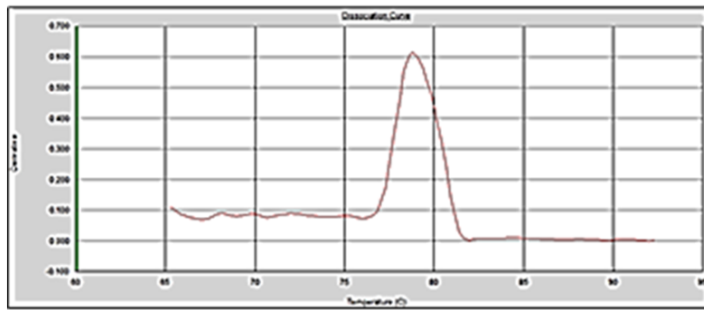

*Zeb2*

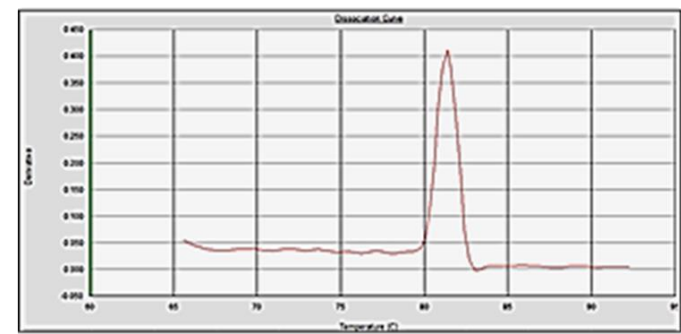

*Vimentin*

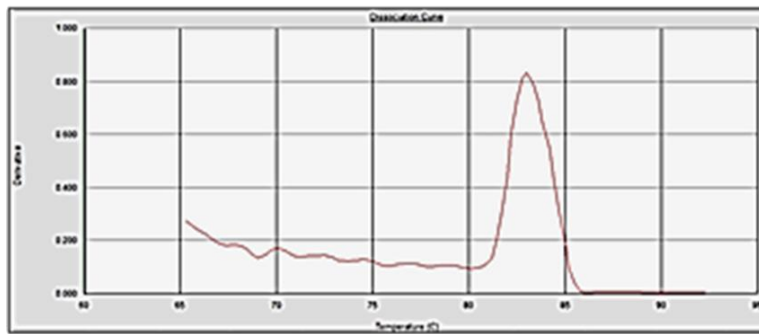

*Acta2*

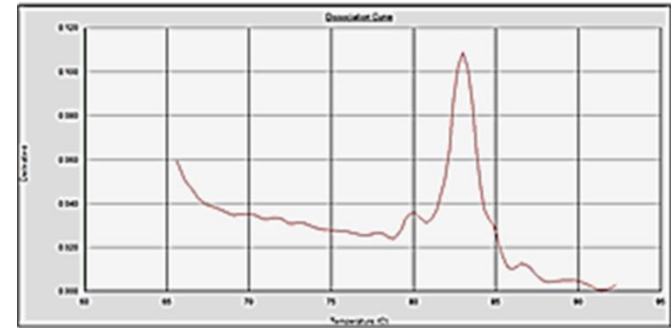

*Col1 $\alpha$ 1*

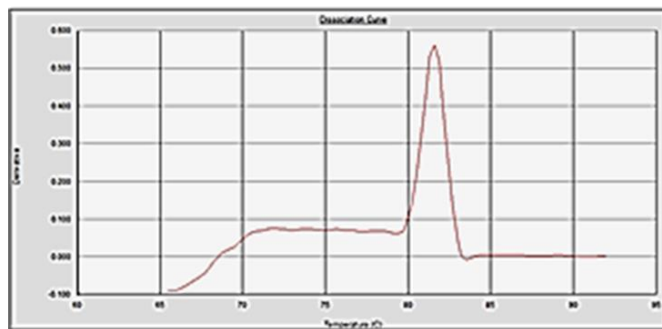

*Hprt*

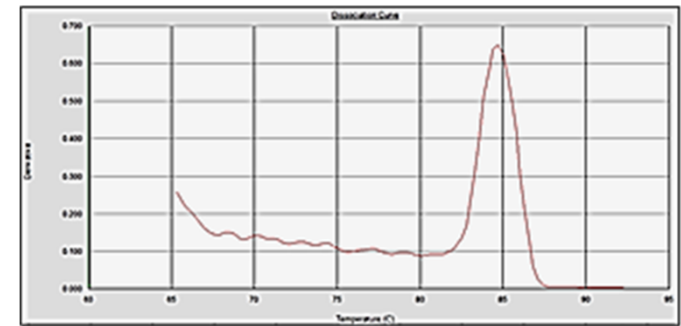

**Supplemental Figure S2.** Representative dissociation curve analysis of qPCR amplification for different genes using total RNA from mouse tumors (Figure 5). The figure shows single peak in the dissociation curve analysis in each case indicative of single amplicon formed following PCR amplification (specificity) in case of all genes.

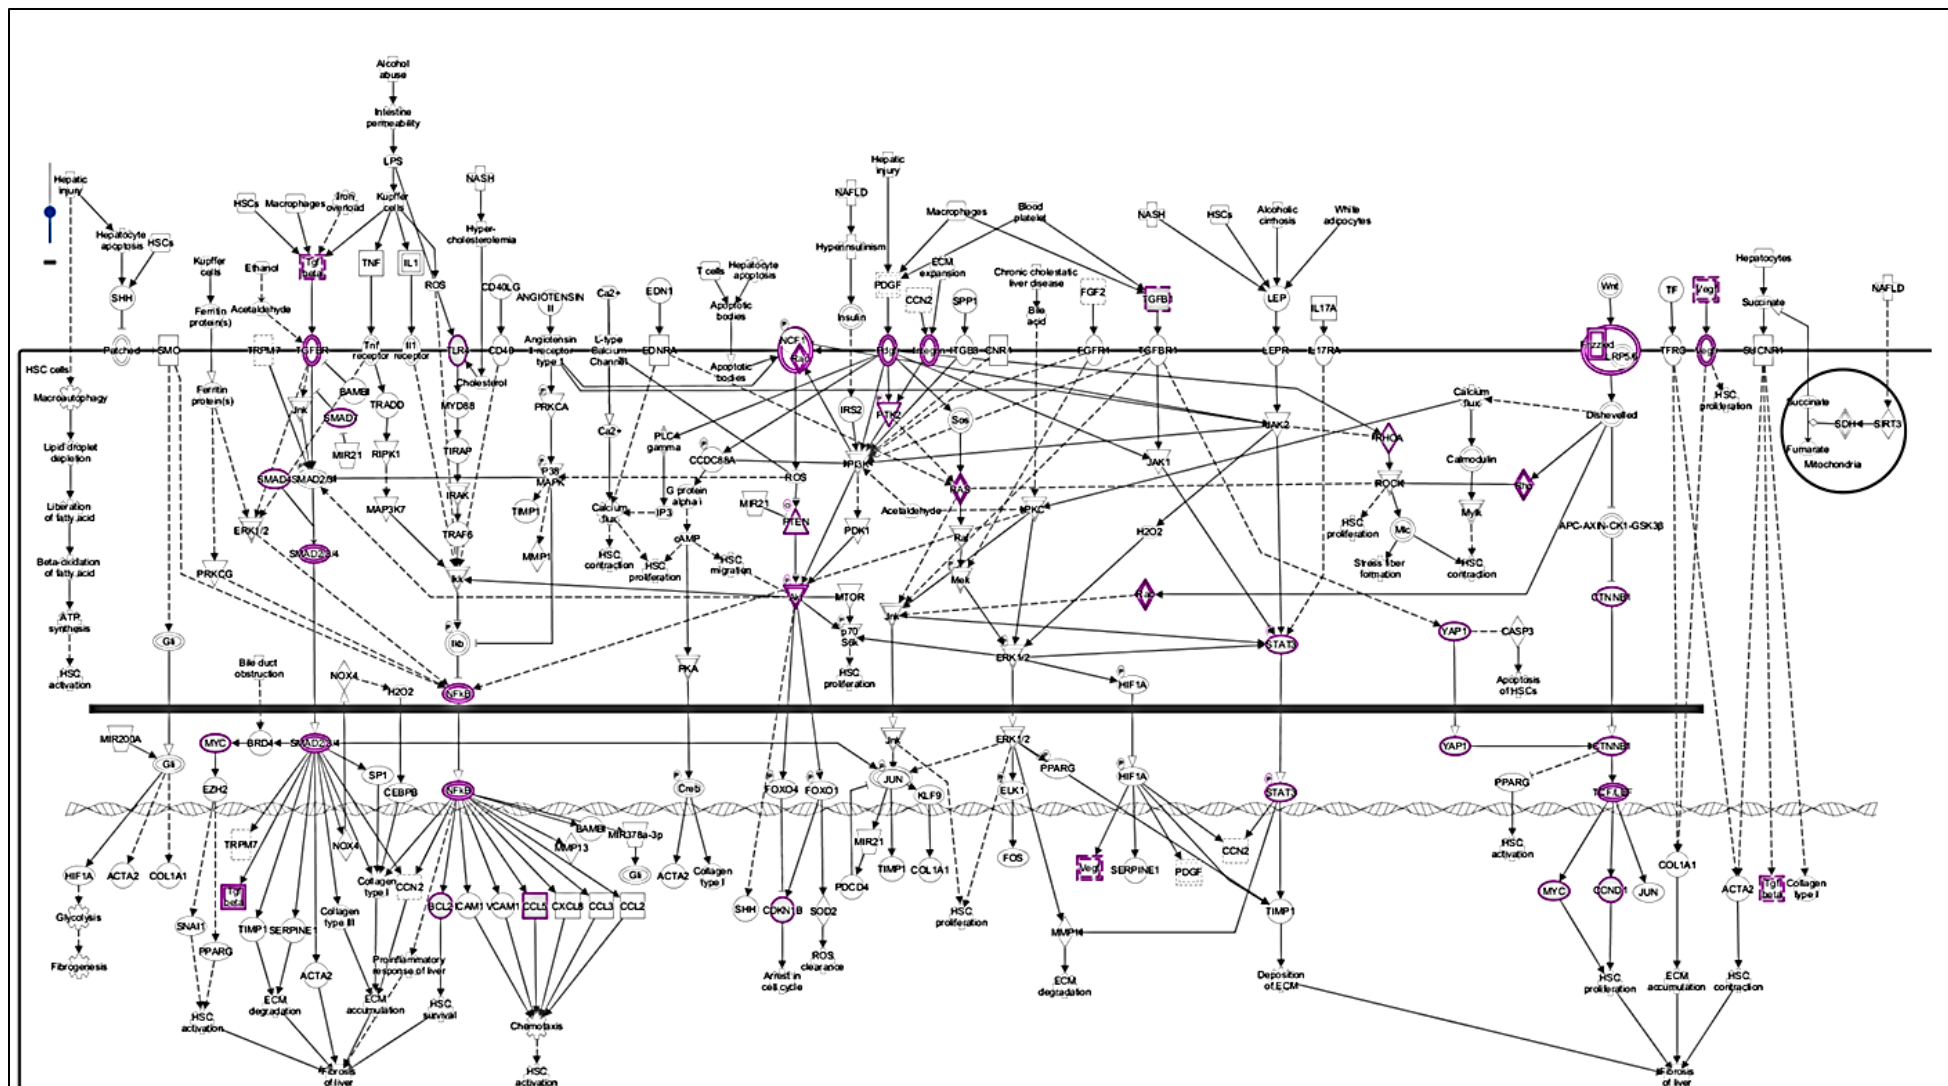

**Supplemental Figure S3.** Gene interaction network map for hepatic fibrosis signaling pathway. This network consist of the following genes: (*Akt1*, *Bcl2*, *Ccl5*, *Ccnd1*, *Cdkn1b*, *Ctnnb1*, *Flt1*, *Fzd7*, *Hras*, *Itgb1*, *Kdr*, *Lef1*, *Myc*, *Nfkb1*, *Nras*, *Pdgfra*, *Pten*, *Ptk2*, *Rac1*, *Rhoa*, *Smad4*, *Smad7*, *Stat3*, *Tcf4*, *Tgfb1*, *Tgfb2*, *Tlr4*, *Vegfa*, *Yap1*) which are part of Qiagen RT2 Profiler PCR Array Mouse Liver Cancer (Cat. #330231) as described in Materials & Methods. The genes are highlighted as pink circles and squares. The figure shows that hepatic stellate cells contribute to fibrogenesis during liver injury transitioning them from quiescent to proliferative, migratory and fibrogenic phenotype. In the presence of proglumide, this fibrosis phenotype is greatly diminished. Gene interaction network map has been generated using IPA (Qiagen).

**Supplemental Table S1: Raw Ct Data and calculation of Relative expression data from the raw Ct data**

|          | Ct data  |          |          |          |         |         |         |         |          |          |          |          |         |         |         |         |
|----------|----------|----------|----------|----------|---------|---------|---------|---------|----------|----------|----------|----------|---------|---------|---------|---------|
|          | Control1 | Control2 | Control3 | Control4 | Progl1  | Progl2  | Progl3  | Progl4  | PD-1Ab-1 | PD-1Ab-2 | PD-1Ab-3 | PD-1Ab-4 | COMBO-1 | COMBO-2 | COMBO-3 | COMBO-4 |
| Gene     |          |          |          |          |         |         |         |         |          |          |          |          |         |         |         |         |
| Zeb-1    | 21.985   | 22.5252  | 21.8594  | 20.8702  | 20.6484 | 23.5412 | 25.3259 | 22.025  | 27.806   | 25.7773  | 25.0329  | 24.5361  | 20.8736 | 22.2171 | 22.3209 | 23.107  |
| Zeb-2    | 23.6355  | 23.4742  | 22.4843  | 21.9316  | 21.3468 | 25.0289 | 26.3819 | 23.0256 | 27.2923  | 27.6724  | 25.4134  | 26.394   | 20.7067 | 23.1684 | 23.7626 | 22.8486 |
| Vimentin | 20.7373  | 20.9688  | 19.9141  | 19.6446  | 19.1269 | 22.9789 | 24.1989 | 21.1025 | 26.9766  | 25.2694  | 24.3401  | 24.2616  | 18.0991 | 21.3182 | 23.102  | 21.303  |
| Acta2    | 26.0525  | 24.7087  | 23.9509  | 22.0198  | 23.4871 | 26.0466 | 27.426  | 25.7459 | 29.1082  | 30.5372  | 27.1597  | 28.0108  | 23.0235 | 25.5081 | 25.1794 | 25.0056 |
| Hprt     | 25.1296  | 25.1959  | 24.4028  | 23.214   | 22.7321 | 26.4607 | 27.5783 | 24.1545 | 30.0551  | 30.3617  | 27.7509  | 27.6681  | 21.2653 | 24.2266 | 24.3483 | 24.6616 |

|                 | Fold Change (Relative expression) |          |          |          |        |        |        |        |          |          |          |          |         |         |         |         |
|-----------------|-----------------------------------|----------|----------|----------|--------|--------|--------|--------|----------|----------|----------|----------|---------|---------|---------|---------|
| Gene            | Control1                          | Control2 | Control3 | Control4 | Progl1 | Progl2 | Progl3 | Progl4 | PD-1Ab-1 | PD-1Ab-2 | PD-1Ab-3 | PD-1Ab-4 | COMBO-1 | COMBO-2 | COMBO-3 | COMBO-4 |
| <i>Zeb-1</i>    | 1                                 | 0.72     | 0.66     | 0.57     | 0.48   | 0.8    | 0.54   | 0.49   | 0.54     | 2.71     | 0.74     | 0.99     | 0.15    | 0.46    | 0.46    | 0.33    |
| <i>Zeb-2</i>    | 1                                 | 1.17     | 1.34     | 0.86     | 0.93   | 0.96   | 0.82   | 0.78   | 2.41     | 2.29     | 1.79     | 0.86     | 0.52    | 0.74    | 0.53    | 1.21    |
| <i>Vimentin</i> | 1                                 | 0.9      | 1.07     | 0.57     | 0.58   | 0.53   | 0.5    | 0.39   | 0.4      | 1.63     | 0.51     | 0.5      | 0.43    | 0.36    | 0.11    | 0.49    |
| <i>Acta2</i>    | 1                                 | 2.66     | 2.59     | 4.34     | 1.12   | 2.53   | 2.11   | 0.66   | 3.65     | 1.68     | 2.86     | 1.5      | 0.56    | 0.8     | 1.07    | 1.49    |

|          |          |          |          |          |         |         |         |         |          |          |          |          |         |         |         |         |
|----------|----------|----------|----------|----------|---------|---------|---------|---------|----------|----------|----------|----------|---------|---------|---------|---------|
|          | Ct data  |          |          |          |         |         |         |         |          |          |          |          |         |         |         |         |
|          | Control1 | Control2 | Control3 | Control4 | Prog1   | Prog2   | Prog3   | Prog4   | PD-1Ab-1 | PD-1Ab-2 | PD-1Ab-3 | PD-1Ab-4 | COMBO1  | COMBO2  | COMBO3  | COMBO4  |
| Col1(a)1 | 28.2784  | 28.0657  | 26.3864  | 26.1612  | 32.1462 | 29.4827 | 30.0847 | 29.5289 | 26.032   | 30.4616  | 30.6332  | 28.1022  | 24.0922 | 26.906  | 26.8582 | 24.4892 |
| Hprt     | 26.6756  | 26.9128  | 24.6408  | 24.7215  | 30.6653 | 27.2431 | 28.5636 | 27.318  | 24.0065  | 28.7814  | 28.6616  | 26.0213  | 21.6744 | 24.6568 | 25.0439 | 23.3933 |

Col1(α)1 was analysed at different time on the the same RNA but c-DNA prepared again newly, thus along with Col1(α)1, Hprt was also run again as reference.

| Fold Change (Relative expression) |          |          |          |           |      |       |       |        |          |          |          |          |        |        |        |        |
|-----------------------------------|----------|----------|----------|-----------|------|-------|-------|--------|----------|----------|----------|----------|--------|--------|--------|--------|
|                                   | Control1 | Control2 | Control3 | Control 4 | Pog1 | Pog 2 | Pog 3 | Pog 4  | PD-1Ab-1 | PD-1Ab-2 | PD-1Ab-3 | PD-1Ab-4 | COMBO1 | COMBO2 | COMBO3 | COMBO4 |
| <i>Col1(α)1</i>                   | 1        | 1.366    | 0.91     | 1.11      | 1.09 | 0.638 | 1.058 | 0.6564 | 0.746    | 1.118    | 1.29     | 0.718    | 0.5684 | 0.6488 | 0.87   | 0.71   |

**Effect of Proglumide , PD1-Ab and Combo on RIL-175 (Coumns labeled shown in the order as presented in Fig5)**

| Gene            | Control        | PD-1Ab      | Prog                 | COMBO         | P value Combo |
|-----------------|----------------|-------------|----------------------|---------------|---------------|
| <i>Zeb-1</i>    | 0.74 ± 0.10    | 1.24 ± 0.49 | 0.59 ± 0.09          | 0.35 ± 0.07   | 0.017         |
| <i>Zeb-2</i>    | 1.09 ± 0.10    | 1.83 ± 0.35 | 0.87 ± 0.043         | 0.75 ± 0.16   | NS            |
| <i>Vimentin</i> | 0.89 ± 0.11    | 0.76 ± 0.29 | 0.5 ± 0.04 (P=0.018) | 0.36 ± 0.08   | 0.01          |
| <i>Col1(α)1</i> | 1.10 ± 0.0.099 | 0.96 ± 0.14 | 0.86 ± 0.12          | 0.70 ± 0.0.06 | 0.01          |
| <i>Acta2</i>    | 2.64 ± 0.68    | 2.42 ± 0.50 | 1.60 ± 0.43          | 0.98 ± 0.19   | 0.05          |
| (p value)*      |                |             |                      |               |               |

Supplemental Table S2: Effect of Proglumide treatment on gene expression in Hepa1-6 cells after 8 and 24 hrs at 20 nM and 40 nM dose

| Gene            | Control (8hr) | 20nM (8hr) | 40nM (8hr) |
|-----------------|---------------|------------|------------|
| <b>Zeb-1</b>    | 1             | 1.07       | 0.96       |
| <b>Zeb-2</b>    | 1             | 1.02       | 0.9        |
| <b>Vimentin</b> | 1             | 0.91       | 0.95       |
| <b>Col1(α)1</b> | 1             | 0.39       | 0.44       |
| <b>Acta2</b>    | 1             | 0.84       | 0.75       |

| Gene            | Control (24hr) | 20nM (24hr) | 40nM (24hr) |
|-----------------|----------------|-------------|-------------|
| <b>Zeb-1</b>    | 1              | 0.83        | 0.91        |
| <b>Zeb-2</b>    | 1              | 0.98        | 1.1         |
| <b>Vimentin</b> | 1              | 0.86        | 0.92        |
| <b>Col1(α)1</b> | 1              | 0.46        | 0.52        |
| <b>Acta2</b>    | 1              | 0.77        | 0.74        |

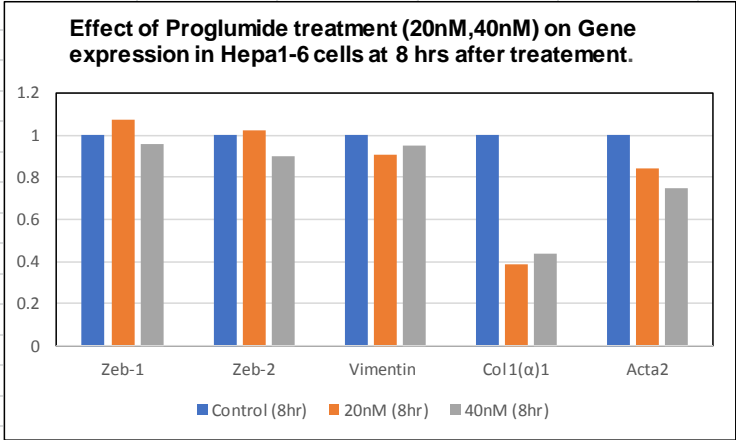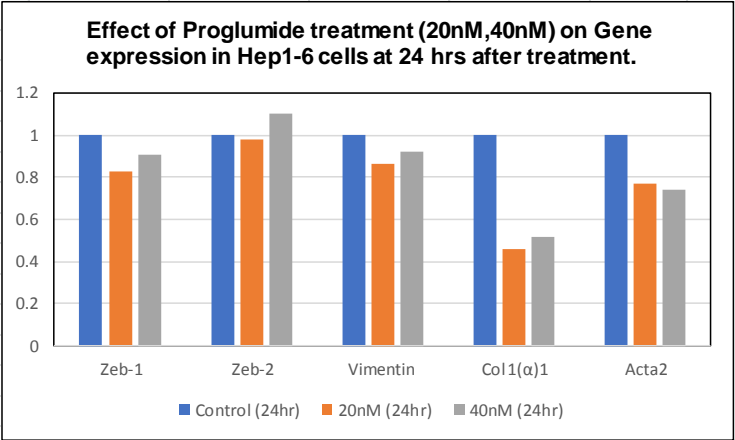

**Supplemental Table S3: Up-Regulated Genes Control Versus Proglumide**

|    | A               | B          | C          | D              | E          | F          | G        | H                       | I                                                                                                  |
|----|-----------------|------------|------------|----------------|------------|------------|----------|-------------------------|----------------------------------------------------------------------------------------------------|
| 1  | gene_id         | Proglumide | Control    | log2FoldChange | pvalue     | gene_name  | gene_chr | gene_biotype            | gene_description                                                                                   |
| 2  | ENSG00000236675 | 382.931409 | 20.7285356 | 4.199114493    | 3.22E-15   | MTX1P1     | 1        | unprocessed_pseudo      | metaxin 1 pseudogene 1 [Source:HGNC Symbol;Acc:HGNC:7505]                                          |
| 3  | ENSG00000275895 | 823.605186 | 88.8401492 | 3.210840387    | 7.05E-12   | U2AF1L5    | 21       | protein_coding          | U2 small nuclear RNA auxiliary factor 1 like 5 [Source:HGNC Symbol;Acc:HGNC:16790]                 |
| 4  | ENSG00000226124 | 28.3663029 | 1.39E-17   | 7.832514884    | 1.09E-06   | FTCDNL1    | 2        | protein_coding          | formiminotransferase cyclodeaminase N-terminal like [Source:HGNC Symbol;Acc:HGNC:16790]            |
| 5  | ENSG00000166415 | 37.4836908 | 4.93452536 | 2.893639573    | 0.0001213  | WDR72      | 15       | protein_coding          | WD repeat domain 72 [Source:HGNC Symbol;Acc:HGNC:26790]                                            |
| 6  | ENSG00000182021 | 20.2619587 | 0.98600522 | 4.196191369    | 0.00024803 | AL591379.1 | 9        | transcribed_unprocessed | methylenetetrahydrofolate dehydrogenase (NADP+ dependent) 1 like                                   |
| 7  | ENSG00000212901 | 222.870589 | 70.0847782 | 1.667242178    | 0.00031972 | KRTAP3-1   | 17       | protein_coding          | keratin associated protein 3-1 [Source:HGNC Symbol;Acc:HGNC:16778]                                 |
| 8  | ENSG00000279267 | 14.1837014 | 1.39E-17   | 6.838830296    | 0.00051726 | AL078621.3 | 2        | TEC                     | TEC                                                                                                |
| 9  | ENSG00000224739 | 18.2358728 | 0.98600522 | 4.045170767    | 0.00057541 | AC016735.1 | 2        | lincRNA                 | novel transcript                                                                                   |
| 10 | ENSG00000178429 | 28.3663029 | 3.94739696 | 2.806128887    | 0.00063679 | RPS3AP5    | 10       | processed_pseudogene    | ribosomal protein S3A pseudogene 5 [Source:HGNC Symbol;Acc:HGNC:16778]                             |
| 11 | ENSG00000196620 | 13.1706587 | 1.39E-17   | 6.732884245    | 0.00085757 | UGT2B15    | 4        | protein_coding          | UDP glucuronosyltransferase family 2 member B15 [Source:HGNC Symbol;Acc:HGNC:16778]                |
| 12 | ENSG00000120278 | 29.379346  | 4.93452536 | 2.543489306    | 0.00118483 | PLEKHG1    | 6        | protein_coding          | pleckstrin homology and RhoGEF domain containing G1 [Source:HGNC Symbol;Acc:HGNC:16778]            |
| 13 | ENSG00000231023 | 50.6532515 | 12.8315343 | 1.970379552    | 0.00123951 | LINC00326  | 6        | lincRNA                 | long intergenic non-protein coding RNA 326 [Source:HGNC Symbol;Acc:HGNC:16778]                     |
| 14 | ENSG00000272129 | 16.209787  | 0.98600522 | 3.87647294     | 0.00136958 | AL359715.3 | 6        | lincRNA                 | novel transcript                                                                                   |
| 15 | ENSG00000216819 | 12.157616  | 1.39E-17   | 6.618536883    | 0.00143701 | TUBB2BP1   | 6        | unprocessed_pseudo      | tubulin beta 2B class IIb pseudogene 1 [Source:HGNC Symbol;Acc:HGNC:16778]                         |
| 16 | ENSG00000273102 | 12.157616  | 1.39E-17   | 6.618536883    | 0.00143701 | AP000569.1 | 21       | lincRNA                 | novel transcript                                                                                   |
| 17 | ENSG00000266983 | 19.2489157 | 1.97313462 | 3.206094843    | 0.00159793 | AC011444.1 | 19       | antisense               | uncharacterized LOC100128568 [Source:NCBI gene;Acc:100128568]                                      |
| 18 | ENSG00000285219 | 25.3271738 | 3.94739696 | 2.643389466    | 0.0016487  | AL591485.1 | 6        | bidirectional_promoter  | uncharacterized LOC100506207 [Source:NCBI gene;Acc:100506207]                                      |
| 19 | ENSG00000122674 | 375.840107 | 144.119137 | 1.382071172    | 0.00171659 | CCZ1       | 7        | protein_coding          | CCZ1 homolog, vacuolar protein trafficking and biogenesis associated                               |
| 20 | ENSG00000076641 | 15.1967442 | 0.98600522 | 3.784099339    | 0.00213372 | PAG1       | 8        | protein_coding          | phosphoprotein membrane anchor with glycosphingolipid microdomain                                  |
| 21 | ENSG00000261744 | 15.1967442 | 0.98600522 | 3.784099339    | 0.00213372 | AC116552.1 | 16       | antisense               | novel transcript, antisense to ZFPM1                                                               |
| 22 | ENSG00000240356 | 146.892351 | 53.3036565 | 1.460261063    | 0.00214681 | RPL23AP7   | 2        | transcribed_processed   | ribosomal protein L23a pseudogene 7 [Source:HGNC Symbol;Acc:HGNC:16778]                            |
| 23 | ENSG00000173156 | 35.4576046 | 7.89590589 | 2.149095693    | 0.00220539 | RHOD       | 11       | protein_coding          | ras homolog family member D [Source:HGNC Symbol;Acc:HGNC:670]                                      |
| 24 | ENSG00000251580 | 62.8097692 | 18.7542855 | 1.736945698    | 0.00223194 | LINC02482  | 4        | lincRNA                 | long intergenic non-protein coding RNA 2482 [Source:HGNC Symbol;Acc:HGNC:16778]                    |
| 25 | ENSG00000188092 | 135.748877 | 49.3551573 | 1.457303189    | 0.00235452 | GPR89B     | 1        | protein_coding          | G protein-coupled receptor 89B [Source:HGNC Symbol;Acc:HGNC:138]                                   |
| 26 | ENSG00000197099 | 18.2358728 | 1.97313462 | 3.128609348    | 0.00236482 | AC068631.1 | 3        | antisense               | novel transcript, antisense to KNG1, HRG, FETUB, AHSG and DNAJB1                                   |
| 27 | ENSG00000181781 | 18.2358728 | 1.97313462 | 3.128609348    | 0.00236482 | ODF3L2     | 19       | protein_coding          | outer dense fiber of sperm tails 3 like 2 [Source:HGNC Symbol;Acc:HGNC:16778]                      |
| 28 | ENSG00000173702 | 49.6402084 | 13.8186597 | 1.835384837    | 0.00241222 | MUC13      | 3        | protein_coding          | mucin 13, cell surface associated [Source:HGNC Symbol;Acc:HGNC:7505]                               |
| 29 | ENSG00000260971 | 11.1445735 | 1.39E-17   | 6.494340146    | 0.00243493 | AC119674.1 | 1        | lincRNA                 | novel transcript                                                                                   |
| 30 | ENSG00000220685 | 11.1445735 | 1.39E-17   | 6.494340146    | 0.00243493 | AL139094.1 | 6        | processed_pseudogene    | transcription factor B2, mitochondrial (TFB2M) pseudogene                                          |
| 31 | ENSG00000006606 | 11.1445735 | 1.39E-17   | 6.494340146    | 0.00243493 | CCL26      | 7        | protein_coding          | C-C motif chemokine ligand 26 [Source:HGNC Symbol;Acc:HGNC:1062]                                   |
| 32 | ENSG00000253893 | 11.1445735 | 1.39E-17   | 6.494340146    | 0.00243493 | FAM85B     | 8        | antisense               | family with sequence similarity 85 member B [Source:HGNC Symbol;Acc:HGNC:16778]                    |
| 33 | ENSG00000276717 | 11.1445735 | 1.39E-17   | 6.494340146    | 0.00243493 | AL136097.3 | 9        | unprocessed_pseudogene  | protease, serine, 12 (neutrypsin, motopsin) (PRSS12) pseudogene                                    |
| 34 | ENSG00000123171 | 11.1445735 | 1.39E-17   | 6.494340146    | 0.00243493 | CCDC70     | 13       | protein_coding          | coiled-coil domain containing 70 [Source:HGNC Symbol;Acc:HGNC:25]                                  |
| 35 | ENSG00000231721 | 89.1488913 | 29.6126602 | 1.585877322    | 0.00255608 | LINC-PINT  | 7        | processed_transcript    | long intergenic non-protein coding RNA, p53 induced transcript [Source:HGNC Symbol;Acc:HGNC:16778] |
| 36 | ENSG00000160182 | 92.1880208 | 31.58691   | 1.541443368    | 0.0031084  | TFF1       | 21       | protein_coding          | trefoil factor 1 [Source:HGNC Symbol;Acc:HGNC:11755]                                               |
| 37 | ENSG00000177455 | 50.6532515 | 14.8057849 | 1.765785373    | 0.00314483 | CD19       | 16       | protein_coding          | CD19 molecule [Source:HGNC Symbol;Acc:HGNC:1633]                                                   |
| 38 | ENSG00000240476 | 45.5880358 | 12.8315343 | 1.818770987    | 0.00319623 | LINC00973  | 3        | lincRNA                 | long intergenic non-protein coding RNA 973 [Source:HGNC Symbol;Acc:HGNC:16778]                     |
| 39 | ENSG00000279332 | 14.1837014 | 0.98600522 | 3.685404125    | 0.00334606 | AC090772.4 | 18       | TEC                     | TEC                                                                                                |
| 40 | ENSG00000272906 | 17.2228299 | 1.97313462 | 3.046724811    | 0.00351516 | AL353708.3 | 1        | lincRNA                 | novel transcript, antisense to TOR1AIP1                                                            |



|    | gene_id         | Proglumide | Control    | log2FoldChange | pvalue     | gene_name  | gene_chr | gene_biotype        | gene_description                                                    |
|----|-----------------|------------|------------|----------------|------------|------------|----------|---------------------|---------------------------------------------------------------------|
| 41 | ENSG00000156127 | 17.2228299 | 1.97313462 | 3.046724811    | 0.00351516 | BATF       | 14       | protein_coding      | basic leucine zipper ATF-like transcription factor [Source:HGNC Syn |
| 42 | ENSG00000274528 | 17.2228299 | 1.97313462 | 3.046724811    | 0.00351516 | AC090970.2 | 15       | sense_intronic      | novel transcript                                                    |
| 43 | ENSG00000164266 | 35.4576046 | 8.88303193 | 1.98167046     | 0.00406065 | SPINK1     | 5        | protein_coding      | serine peptidase inhibitor, Kazal type 1 [Source:HGNC Symbol;Acc:!  |
| 44 | ENSG00000135625 | 10.1315311 | 1.39E-17   | 6.358435969    | 0.00417417 | EGR4       | 2        | protein_coding      | early growth response 4 [Source:HGNC Symbol;Acc:HGNC:3241]          |
| 45 | ENSG00000158428 | 10.1315311 | 1.39E-17   | 6.358435969    | 0.00417417 | CATIP      | 2        | protein_coding      | ciliogenesis associated TTC17 interacting protein [Source:HGNC Sy   |
| 46 | ENSG00000231357 | 10.1315311 | 1.39E-17   | 6.358435969    | 0.00417417 | AC006028.1 | 7        | processed_pseudogen | prefoldin subunit 4 (PFDN4) pseudogene                              |
| 47 | ENSG00000257660 | 10.1315311 | 1.39E-17   | 6.358435969    | 0.00417417 | AC117498.2 | 12       | lincRNA             | uncharacterized LOC100506125 [Source:NCBI gene;Acc:100506125        |
| 48 | ENSG00000256061 | 10.1315311 | 1.39E-17   | 6.358435969    | 0.00417417 | DNAAF4     | 15       | protein_coding      | dynein axonemal assembly factor 4 [Source:HGNC Symbol;Acc:HGNC:1    |
| 49 | ENSG00000273199 | 10.1315311 | 1.39E-17   | 6.358435969    | 0.00417417 | AP000692.2 | 21       | antisense           | novel transcript, antisense to MORC3                                |
| 50 | ENSG00000251661 | 27.3532599 | 5.92165277 | 2.18376506     | 0.00462106 | AC136475.1 | 11       | antisense           | novel transcript, antisense to IFITM3                               |
| 51 | ENSG00000236778 | 19.2489157 | 2.96026697 | 2.650053167    | 0.00484911 | INTS6-AS1  | 13       | antisense           | INTS6 antisense RNA 1 [Source:HGNC Symbol;Acc:HGNC:42691]           |
| 52 | ENSG00000237686 | 123.592359 | 48.3680324 | 1.351153843    | 0.00493237 | AL109615.3 | 6        | antisense           | uncharacterized LOC101929705 [Source:NCBI gene;Acc:101929705        |
| 53 | ENSG00000185467 | 16.209787  | 1.97313462 | 2.959911521    | 0.00524731 | KPNA7      | 7        | protein_coding      | karyopherin subunit alpha 7 [Source:HGNC Symbol;Acc:HGNC:2183       |
| 54 | ENSG00000225611 | 13.1706587 | 0.98600522 | 3.579458074    | 0.00528154 | LINC02158  | 3        | antisense           | long intergenic non-protein coding RNA 2158 [Source:HGNC Symbo      |
| 55 | ENSG00000249249 | 13.1706587 | 0.98600522 | 3.579458074    | 0.00528154 | AC010226.1 | 5        | antisense           | uncharacterized LOC101927100 [Source:NCBI gene;Acc:101927100        |
| 56 | ENSG00000187260 | 24.3141307 | 4.93452536 | 2.271743569    | 0.00528628 | WDR86      | 7        | protein_coding      | WD repeat domain 86 [Source:HGNC Symbol;Acc:HGNC:28020]             |
| 57 | ENSG00000212724 | 24.3141307 | 4.93452536 | 2.271743569    | 0.00528628 | KRTAP2-3   | 17       | protein_coding      | keratin associated protein 2-3 [Source:HGNC Symbol;Acc:HGNC:18      |
| 58 | ENSG00000136235 | 74.9662871 | 26.6512854 | 1.487610685    | 0.00570156 | GPNMB      | 7        | protein_coding      | glycoprotein nmb [Source:HGNC Symbol;Acc:HGNC:4462]                 |
| 59 | ENSG00000224945 | 31.4054322 | 7.89590589 | 1.974662755    | 0.00591186 | AL353150.1 | 9        | sense_intronic      | novel transcript                                                    |
| 60 | ENSG00000180596 | 60.7836829 | 20.7285356 | 1.546255463    | 0.00602796 | HIST1H2BC  | 6        | protein_coding      | histone cluster 1 H2B family member c [Source:HGNC Symbol;Acc:!     |
| 61 | ENSG00000280099 | 21.2750017 | 3.94739696 | 2.393199599    | 0.00607288 | AL603750.1 | 1        | TEC                 | TEC                                                                 |
| 62 | ENSG00000205238 | 46.6010789 | 14.8057849 | 1.645799909    | 0.00637015 | SPDYE2     | 7        | protein_coding      | speedy/RINGO cell cycle regulator family member E2 [Source:HGNC     |
| 63 | ENSG00000161031 | 33.4315184 | 8.88303193 | 1.897088672    | 0.00648527 | PGLYRP2    | 19       | protein_coding      | peptidoglycan recognition protein 2 [Source:HGNC Symbol;Acc:HGNC    |
| 64 | ENSG00000134240 | 18.2358728 | 2.96026697 | 2.572567673    | 0.00696616 | HMGCS2     | 1        | protein_coding      | 3-hydroxy-3-methylglutaryl-CoA synthase 2 [Source:HGNC Symbol;A     |
| 65 | ENSG00000232060 | 18.2358728 | 2.96026697 | 2.572567673    | 0.00696616 | SLC4A1APP1 | 9        | processed_pseudogen | solute carrier family 4 member 1 adaptor protein pseudogene 1 [So   |
| 66 | ENSG00000163220 | 9.11848879 | 1.39E-17   | 6.208385228    | 0.00724341 | S100A9     | 1        | protein_coding      | S100 calcium binding protein A9 [Source:HGNC Symbol;Acc:HGNC:1      |
| 67 | ENSG00000170075 | 9.11848879 | 1.39E-17   | 6.208385228    | 0.00724341 | GPR37L1    | 1        | protein_coding      | G protein-coupled receptor 37 like 1 [Source:HGNC Symbol;Acc:HGNC   |
| 68 | ENSG00000251574 | 9.11848879 | 1.39E-17   | 6.208385228    | 0.00724341 | AC099520.1 | 5        | lincRNA             | uncharacterized LOC105379109 [Source:NCBI gene;Acc:105379109]       |
| 69 | ENSG00000223548 | 9.11848879 | 1.39E-17   | 6.208385228    | 0.00724341 | AC034228.1 | 5        | antisense           | novel transcript                                                    |
| 70 | ENSG00000173261 | 9.11848879 | 1.39E-17   | 6.208385228    | 0.00724341 | PLAC8L1    | 5        | protein_coding      | PLAC8 like 1 [Source:HGNC Symbol;Acc:HGNC:31746]                    |
| 71 | ENSG00000253582 | 9.11848879 | 1.39E-17   | 6.208385228    | 0.00724341 | AC090579.1 | 8        | antisense           | uncharacterized LOC105375700 [Source:NCBI gene;Acc:105375700]       |
| 72 | ENSG00000181074 | 9.11848879 | 1.39E-17   | 6.208385228    | 0.00724341 | OR52N4     | 11       | protein_coding      | olfactory receptor family 52 subfamily N member 4 (gene/pseudoge    |
| 73 | ENSG00000236514 | 9.11848879 | 1.39E-17   | 6.208385228    | 0.00724341 | AL135791.1 | 10       | antisense           | novel transcript                                                    |
| 74 | ENSG00000259013 | 9.11848879 | 1.39E-17   | 6.208385228    | 0.00724341 | AL118558.2 | 14       | processed_pseudogen | NADH dehydrogenase (ubiquinone) 1 alpha subcomplex, 4, 9kDa (N      |
| 75 | ENSG00000271623 | 9.11848879 | 1.39E-17   | 6.208385228    | 0.00724341 | AC138894.3 | 16       | processed_pseudogen | PRKC, apoptosis, WT1, regulator (PAWR) pseudogene                   |
| 76 | ENSG00000261390 | 9.11848879 | 1.39E-17   | 6.208385228    | 0.00724341 | MAFTRR     | 16       | lincRNA             | MAF transcriptional regulator RNA [Source:HGNC Symbol;Acc:HGNC      |
| 77 | ENSG00000259207 | 9.11848879 | 1.39E-17   | 6.208385228    | 0.00724341 | ITGB3      | 17       | protein_coding      | integrin subunit beta 3 [Source:HGNC Symbol;Acc:HGNC:6156]          |
| 78 | ENSG00000273017 | 9.11848879 | 1.39E-17   | 6.208385228    | 0.00724341 | AP000240.1 | 21       | sense_intronic      | novel transcript, sense intronic BACH1                              |
| 79 | ENSG00000213654 | 43.5619495 | 13.8186597 | 1.647445268    | 0.00725997 | GPSM3      | 6        | protein_coding      | G protein signaling modulator 3 [Source:HGNC Symbol;Acc:HGNC:1      |
| 80 | ENSG00000104055 | 52.6793378 | 17.7671604 | 1.561212026    | 0.00726739 | TGM5       | 15       | protein_coding      | transglutaminase 5 [Source:HGNC Symbol;Acc:HGNC:11781]              |



| gene_id | Proglumide      |            | Control    | log2FoldChange | pvalue     | gene_name  | gene_chr | gene_biotype                       | gene_description                                                                               |
|---------|-----------------|------------|------------|----------------|------------|------------|----------|------------------------------------|------------------------------------------------------------------------------------------------|
| 81      | ENSG00000105825 | 54.7054241 | 18.7542855 | 1.538061312    | 0.00753465 | TFPI2      | 7        | protein_coding                     | tissue factor pathway inhibitor 2 [Source:HGNC Symbol;Acc:HGNC:105825]                         |
| 82      | ENSG00000260179 | 30.3923891 | 7.89590589 | 1.927547666    | 0.00758204 | AL162741.1 | 1        | lincRNA                            | novel transcript                                                                               |
| 83      | ENSG00000198157 | 15.1967442 | 1.97313462 | 2.86753792     | 0.00786477 | HMG5       | X        | protein_coding                     | high mobility group nucleosome binding domain 5 [Source:HGNC Symbol;Acc:HGNC:198157]           |
| 84      | ENSG00000272720 | 39.509777  | 11.8444089 | 1.727244858    | 0.00794554 | AL022322.1 | 22       | lincRNA                            | novel transcript, antisense to BAIAP2L2                                                        |
| 85      | ENSG00000025423 | 25.3271738 | 5.92165277 | 2.073258661    | 0.00813533 | HSD17B6    | 12       | protein_coding                     | hydroxysteroid 17-beta dehydrogenase 6 [Source:HGNC Symbol;Acc:HGNC:25423]                     |
| 86      | ENSG00000114450 | 12.157616  | 0.98600522 | 3.465110713    | 0.00839028 | GNB4       | 3        | protein_coding                     | G protein subunit beta 4 [Source:HGNC Symbol;Acc:HGNC:20731]                                   |
| 87      | ENSG00000196972 | 12.157616  | 0.98600522 | 3.465110713    | 0.00839028 | SMIM10L2B  | X        | protein_coding                     | small integral membrane protein 10 like 2B [Source:HGNC Symbol;Acc:HGNC:196972]                |
| 88      | ENSG00000273599 | 12.157616  | 0.98600522 | 3.465110713    | 0.00839028 | AL731571.1 | 10       | antisense                          | novel transcript, antisense to CTBP2                                                           |
| 89      | ENSG00000277011 | 12.157616  | 0.98600522 | 3.465110713    | 0.00839028 | AC148477.4 | 12       | lincRNA                            | novel transcript                                                                               |
| 90      | ENSG00000197776 | 12.157616  | 0.98600522 | 3.465110713    | 0.00839028 | KLHDC1     | 14       | protein_coding                     | kelch domain containing 1 [Source:HGNC Symbol;Acc:HGNC:19836]                                  |
| 91      | ENSG00000158406 | 20.2619587 | 3.94739696 | 2.323231543    | 0.00845893 | HIST1H4H   | 6        | protein_coding                     | histone cluster 1 H4 family member h [Source:HGNC Symbol;Acc:HGNC:158406]                      |
| 92      | ENSG00000230797 | 20.2619587 | 3.94739696 | 2.323231543    | 0.00845893 | YY2        | X        | protein_coding                     | YY2 transcription factor [Source:HGNC Symbol;Acc:HGNC:31684]                                   |
| 93      | ENSG00000233085 | 34.4445615 | 9.87015775 | 1.789999176    | 0.00876482 | BX322234.2 | 6        | lincRNA                            | novel transcript                                                                               |
| 94      | ENSG00000223797 | 53.6923809 | 18.7542855 | 1.511156315    | 0.00878145 | ENTPD3-AS1 | 3        | antisense                          | ENTPD3 antisense RNA 1 [Source:HGNC Symbol;Acc:HGNC:26710]                                     |
| 95      | ENSG00000170458 | 53.6923809 | 18.7542855 | 1.511156315    | 0.00878145 | CD14       | 5        | protein_coding                     | CD14 molecule [Source:HGNC Symbol;Acc:HGNC:1628]                                               |
| 96      | ENSG00000215859 | 48.6271652 | 16.7800353 | 1.527888841    | 0.00970392 | PDZK1P1    | 1        | transcribed_unprocessed_pseudogene | PDZ domain containing 1 pseudogene 1 [Source:HGNC Symbol;Acc:HGNC:215859]                      |
| 97      | ENSG00000283183 | 17.2228299 | 2.96026697 | 2.490683136    | 0.01003372 | AC116565.1 | 4        | lincRNA                            | novel transcript                                                                               |
| 98      | ENSG00000261120 | 17.2228299 | 2.96026697 | 2.490683136    | 0.01003372 | AL133299.1 | 14       | antisense                          | novel transcript, antisense to LRRC9                                                           |
| 99      | ENSG00000157021 | 17.2228299 | 2.96026697 | 2.490683136    | 0.01003372 | FAM92A1P1  | 15       | unprocessed_pseudogene             | family with sequence similarity 92 member A1 pseudogene 1 [Source:HGNC Symbol;Acc:HGNC:157021] |
| 100     | ENSG00000188243 | 517.66615  | 239.87024  | 1.109355021    | 0.0100429  | COMMD6     | 13       | protein_coding                     | COMM domain containing 6 [Source:HGNC Symbol;Acc:HGNC:240243]                                  |
| 101     | ENSG00000092607 | 69.9010713 | 26.6512854 | 1.386855781    | 0.01041416 | TBX15      | 1        | protein_coding                     | T-box 15 [Source:HGNC Symbol;Acc:HGNC:11594]                                                   |
| 102     | ENSG00000025039 | 24.3141307 | 5.92165277 | 2.014660151    | 0.01081171 | RRAGD      | 6        | protein_coding                     | Ras related GTP binding D [Source:HGNC Symbol;Acc:HGNC:19903]                                  |
| 103     | ENSG00000089199 | 24.3141307 | 5.92165277 | 2.014660151    | 0.01081171 | CHGB       | 20       | protein_coding                     | chromogranin B [Source:HGNC Symbol;Acc:HGNC:1930]                                              |
| 104     | ENSG00000280077 | 43.5619495 | 14.8057849 | 1.54877193     | 0.01085078 | AL353763.2 | 9        | TEC                                | TEC                                                                                            |
| 105     | ENSG00000171016 | 47.6141221 | 16.7800353 | 1.497593888    | 0.01144017 | PYGO1      | 15       | protein_coding                     | pygopus family PHD finger 1 [Source:HGNC Symbol;Acc:HGNC:3021016]                              |
| 106     | ENSG00000236790 | 14.1837014 | 1.97313462 | 2.768842706    | 0.01183243 | LINC00299  | 2        | lincRNA                            | long intergenic non-protein coding RNA 299 [Source:HGNC Symbol;Acc:HGNC:236790]                |
| 107     | ENSG00000277156 | 106.370625 | 45.406658  | 1.22580339     | 0.01234179 | AL589743.5 | 14       | processed_pseudogene               | translocase of outer mitochondrial membrane 40 homolog (yeast)                                 |
| 108     | ENSG00000199890 | 8.10544673 | 1.39E-17   | 6.040896957    | 0.01273085 | RF00019    | 1        | misc_RNA                           |                                                                                                |
| 109     | ENSG00000241985 | 8.10544673 | 1.39E-17   | 6.040896957    | 0.01273085 | WWTR1-IT1  | 3        | sense_intronic                     | WWTR1 intronic transcript 1 [Source:HGNC Symbol;Acc:HGNC:4141985]                              |
| 110     | ENSG00000229619 | 8.10544673 | 1.39E-17   | 6.040896957    | 0.01273085 | MBNL1-AS1  | 3        | antisense                          | MBNL1 antisense RNA 1 [Source:HGNC Symbol;Acc:HGNC:44584]                                      |
| 111     | ENSG00000196542 | 8.10544673 | 1.39E-17   | 6.040896957    | 0.01273085 | SPTSSB     | 3        | protein_coding                     | serine palmitoyltransferase small subunit B [Source:HGNC Symbol;Acc:HGNC:196542]               |
| 112     | ENSG00000121853 | 8.10544673 | 1.39E-17   | 6.040896957    | 0.01273085 | GHSR       | 3        | protein_coding                     | growth hormone secretagogue receptor [Source:HGNC Symbol;Acc:HGNC:21853]                       |
| 113     | ENSG00000183171 | 8.10544673 | 1.39E-17   | 6.040896957    | 0.01273085 | BX322650.1 | X        | processed_pseudogene               | nucleolar protein 11, pseudogene                                                               |
| 114     | ENSG00000120903 | 8.10544673 | 1.39E-17   | 6.040896957    | 0.01273085 | CHRNA2     | 8        | protein_coding                     | cholinergic receptor nicotinic alpha 2 subunit [Source:HGNC Symbol;Acc:HGNC:120903]            |
| 115     | ENSG00000187753 | 8.10544673 | 1.39E-17   | 6.040896957    | 0.01273085 | C9orf153   | 9        | protein_coding                     | chromosome 9 open reading frame 153 [Source:HGNC Symbol;Acc:HGNC:187753]                       |
| 116     | ENSG00000244242 | 8.10544673 | 1.39E-17   | 6.040896957    | 0.01273085 | IFITM10    | 11       | protein_coding                     | interferon induced transmembrane protein 10 [Source:HGNC Symbol;Acc:HGNC:244242]               |
| 117     | ENSG00000261594 | 8.10544673 | 1.39E-17   | 6.040896957    | 0.01273085 | TPBGL      | 11       | protein_coding                     | trophoblast glycoprotein like [Source:HGNC Symbol;Acc:HGNC:441594]                             |
| 118     | ENSG00000226645 | 8.10544673 | 1.39E-17   | 6.040896957    | 0.01273085 | AP006216.1 | 11       | antisense                          | novel transcript                                                                               |
| 119     | ENSG00000234859 | 8.10544673 | 1.39E-17   | 6.040896957    | 0.01273085 | AC003958.2 | 17       | antisense                          | uncharacterized LOC100505782 [Source:NCBI gene;Acc:100505782]                                  |
| 120     | ENSG00000154262 | 8.10544673 | 1.39E-17   | 6.040896957    | 0.01273085 | ABCA6      | 17       | protein_coding                     | ATP binding cassette subfamily A member 6 [Source:HGNC Symbol;Acc:HGNC:154262]                 |

| gene_id | Proglumide      |            | Control    | log2FoldChange | pvalue     | gene_name  | gene_chr | gene_biotype                     | gene_description                                                                              |
|---------|-----------------|------------|------------|----------------|------------|------------|----------|----------------------------------|-----------------------------------------------------------------------------------------------|
| 121     | ENSG00000272432 | 11.1445735 | 0.98600522 | 3.340913975    | 0.01341209 | AL031432.3 | 1        | lincRNA                          | novel transcript                                                                              |
| 122     | ENSG00000280032 | 11.1445735 | 0.98600522 | 3.340913975    | 0.01341209 | AP002800.1 | 11       | TEC                              | TEC                                                                                           |
| 123     | ENSG00000070731 | 11.1445735 | 0.98600522 | 3.340913975    | 0.01341209 | ST6GALNAC2 | 17       | protein_coding                   | ST6 N-acetylgalactosaminide alpha-2,6-sialyltransferase 2 [Source:HGNC Symbol;Acc:HGNC:11657] |
| 124     | ENSG00000242220 | 11.1445735 | 0.98600522 | 3.340913975    | 0.01341209 | TCP10L     | 21       | protein_coding                   | t-complex 10 like [Source:HGNC Symbol;Acc:HGNC:11657]                                         |
| 125     | ENSG00000254860 | 34.4445615 | 10.8572834 | 1.65413649     | 0.01417872 | TMEM9B-AS1 | 11       | antisense                        | TMEM9B antisense RNA 1 [Source:HGNC Symbol;Acc:HGNC:19230]                                    |
| 126     | ENSG00000166343 | 34.4445615 | 10.8572834 | 1.65413649     | 0.01417872 | MSS51      | 10       | protein_coding                   | MSS51 mitochondrial translational activator [Source:HGNC Symbol;Acc:HGNC:19230]               |
| 127     | ENSG00000101000 | 92.1880208 | 39.4839089 | 1.220652932    | 0.01425262 | PROCR      | 20       | protein_coding                   | protein C receptor [Source:HGNC Symbol;Acc:HGNC:9452]                                         |
| 128     | ENSG00000270195 | 23.3010877 | 5.92165277 | 1.953580386    | 0.01438022 | AC016773.1 | 4        | lincRNA                          | novel transcript                                                                              |
| 129     | ENSG00000151846 | 23.3010877 | 5.92165277 | 1.953580386    | 0.01438022 | PABPC3     | 13       | protein_coding                   | poly(A) binding protein cytoplasmic 3 [Source:HGNC Symbol;Acc:HGNC:9452]                      |
| 130     | ENSG00000138161 | 16.209787  | 2.96026697 | 2.403869845    | 0.01448543 | CUZD1      | 10       | protein_coding                   | CUB and zona pellucida like domains 1 [Source:HGNC Symbol;Acc:HGNC:9452]                      |
| 131     | ENSG00000268621 | 36.4706477 | 11.8444089 | 1.612146733    | 0.01458372 | IGFL2-AS1  | 19       | lincRNA                          | IGFL2 antisense RNA 1 [Source:HGNC Symbol;Acc:HGNC:52559]                                     |
| 132     | ENSG00000269837 | 112.448884 | 49.3551573 | 1.185904831    | 0.01468926 | IPO5P1     | 19       | transcribed_processed_transcript | importin 5 pseudogene 1 [Source:HGNC Symbol;Acc:HGNC:49687]                                   |
| 133     | ENSG00000264808 | 27.3532599 | 7.89590589 | 1.776200983    | 0.01605156 | AC068025.1 | 17       | antisense                        | novel transcript, antisense to TAOK1                                                          |
| 134     | ENSG00000269427 | 27.3532599 | 7.89590589 | 1.776200983    | 0.01605156 | AC024075.3 | 19       | antisense                        | novel transcript, antisense C19orf42                                                          |
| 135     | ENSG00000189223 | 18.2358728 | 3.94739696 | 2.172210941    | 0.01649288 | PAX8-AS1   | 2        | processed_transcript             | PAX8 antisense RNA 1 [Source:HGNC Symbol;Acc:HGNC:49271]                                      |
| 136     | ENSG00000206633 | 29.379346  | 8.88303193 | 1.711416578    | 0.01665464 | RUNX3      | 1        | protein_coding                   | runt related transcription factor 3 [Source:HGNC Symbol;Acc:HGNC:49271]                       |
| 137     | ENSG00000254231 | 35.4576046 | 11.8444089 | 1.571645529    | 0.01786044 | AC103760.1 | 8        | processed_transcript             | uncharacterized LOC105375624 [Source:NCBI gene;Acc:105375624]                                 |
| 138     | ENSG00000231327 | 13.1706587 | 1.97313462 | 2.662896655    | 0.01786222 | LINC01816  | 2        | lincRNA                          | long intergenic non-protein coding RNA 1816 [Source:HGNC Symbol;Acc:105375624]                |
| 139     | ENSG00000177855 | 13.1706587 | 1.97313462 | 2.662896655    | 0.01786222 | CACYBP2    | 2        | processed_pseudogene             | calcyclin binding protein pseudogene 2 [Source:HGNC Symbol;Acc:105375624]                     |
| 140     | ENSG00000269921 | 13.1706587 | 1.97313462 | 2.662896655    | 0.01786222 | AC068620.1 | 4        | lincRNA                          | novel transcript                                                                              |
| 141     | ENSG00000029534 | 13.1706587 | 1.97313462 | 2.662896655    | 0.01786222 | ANK1       | 8        | protein_coding                   | ankyrin 1 [Source:HGNC Symbol;Acc:HGNC:492]                                                   |
| 142     | ENSG00000237082 | 13.1706587 | 1.97313462 | 2.662896655    | 0.01786222 | COX5BP6    | 13       | processed_pseudogene             | cytochrome c oxidase subunit 5B pseudogene 6 [Source:HGNC Symbol;Acc:HGNC:492]                |
| 143     | ENSG00000226359 | 13.1706587 | 1.97313462 | 2.662896655    | 0.01786222 | ACTG1P24   | 17       | processed_pseudogene             | actin gamma 1 pseudogene 24 [Source:HGNC Symbol;Acc:HGNC:492]                                 |
| 144     | ENSG00000149599 | 13.1706587 | 1.97313462 | 2.662896655    | 0.01786222 | DUSP15     | 20       | protein_coding                   | dual specificity phosphatase 15 [Source:HGNC Symbol;Acc:HGNC:492]                             |
| 145     | ENSG00000259349 | 20.2619587 | 4.93452536 | 2.010184156    | 0.01800317 | AC011921.1 | 17       | antisense                        | novel transcript, antisense to APPBP2                                                         |
| 146     | ENSG00000146674 | 231.987977 | 110.556894 | 1.068387152    | 0.01801387 | IGFBP3     | 7        | protein_coding                   | insulin like growth factor binding protein 3 [Source:HGNC Symbol;Acc:HGNC:492]                |
| 147     | ENSG00000178809 | 39.509777  | 13.8186597 | 1.507006023    | 0.01833224 | TRIM73     | 7        | protein_coding                   | tripartite motif containing 73 [Source:HGNC Symbol;Acc:HGNC:1810]                             |
| 148     | ENSG00000254827 | 39.509777  | 13.8186597 | 1.507006023    | 0.01833224 | SLC22A18AS | 11       | protein_coding                   | solute carrier family 22 member 18 antisense [Source:HGNC Symbol;Acc:HGNC:1810]               |
| 149     | ENSG00000019102 | 41.5358633 | 14.8057849 | 1.480260517    | 0.01850271 | VSIG2      | 11       | protein_coding                   | V-set and immunoglobulin domain containing 2 [Source:HGNC Symbol;Acc:HGNC:1810]               |
| 150     | ENSG00000188321 | 52.6793378 | 20.7285356 | 1.340259987    | 0.01899147 | ZNF559     | 19       | protein_coding                   | zinc finger protein 559 [Source:HGNC Symbol;Acc:HGNC:28197]                                   |
| 151     | ENSG00000005513 | 22.2880447 | 5.92165277 | 1.889799908    | 0.01913737 | SOX8       | 16       | protein_coding                   | SRY-box 8 [Source:HGNC Symbol;Acc:HGNC:11203]                                                 |
| 152     | ENSG00000128564 | 135.748877 | 63.1749046 | 1.101956778    | 0.01928491 | VGF        | 7        | protein_coding                   | VGF nerve growth factor inducible [Source:HGNC Symbol;Acc:HGNC:11203]                         |
| 153     | ENSG00000172594 | 177.283646 | 83.9045253 | 1.078080754    | 0.01951749 | SMPDL3A    | 6        | protein_coding                   | sphingomyelin phosphodiesterase acid like 3A [Source:HGNC Symbol;Acc:HGNC:11203]              |
| 154     | ENSG00000183087 | 26.3402168 | 7.89590589 | 1.722005585    | 0.02062376 | GAS6       | 13       | protein_coding                   | growth arrest specific 6 [Source:HGNC Symbol;Acc:HGNC:4168]                                   |
| 155     | ENSG00000187566 | 15.1967442 | 2.96026697 | 2.311496245    | 0.02095211 | NHLRC1     | 6        | protein_coding                   | NHL repeat containing E3 ubiquitin protein ligase 1 [Source:HGNC Symbol;Acc:HGNC:4168]        |
| 156     | ENSG00000221947 | 15.1967442 | 2.96026697 | 2.311496245    | 0.02095211 | XKR9       | 8        | protein_coding                   | XK related 9 [Source:HGNC Symbol;Acc:HGNC:20937]                                              |
| 157     | ENSG00000198003 | 15.1967442 | 2.96026697 | 2.311496245    | 0.02095211 | CCDC151    | 19       | protein_coding                   | coiled-coil domain containing 151 [Source:HGNC Symbol;Acc:HGNC:20937]                         |
| 158     | ENSG00000185829 | 115.488013 | 53.3036565 | 1.113575482    | 0.02120325 | ARL17A     | 17       | protein_coding                   | ADP ribosylation factor like GTPase 17A [Source:HGNC Symbol;Acc:HGNC:20937]                   |
| 159     | ENSG00000271643 | 63.8228124 | 26.6512854 | 1.255856475    | 0.02147397 | AC112220.2 | 3        | bidirectional_promoter_lncRNA    | novel transcript                                                                              |
| 160     | ENSG00000231050 | 10.1315311 | 0.98600522 | 3.205009798    | 0.02156655 | AL109917.1 | 1        | antisense                        | collagen alpha-2(VIII) chain [Source:NCBI gene;Acc:105378949]                                 |



| gene_id | Proglumide      |            | Control    | log2FoldChange | pvalue     | gene_name  | gene_chr | gene_biotype            | gene_description                                                                               |
|---------|-----------------|------------|------------|----------------|------------|------------|----------|-------------------------|------------------------------------------------------------------------------------------------|
| 160     | ENSG00000231050 | 10.1315311 | 0.98600522 | 3.205009798    | 0.02156655 | AL109917.1 | 1        | antisense               | collagen alpha-2(VIII) chain [Source:NCBI gene;Acc:105378949]                                  |
| 161     | ENSG00000174130 | 10.1315311 | 0.98600522 | 3.205009798    | 0.02156655 | TLR6       | 4        | protein_coding          | toll like receptor 6 [Source:HGNC Symbol;Acc:HGNC:16711]                                       |
| 162     | ENSG00000272677 | 10.1315311 | 0.98600522 | 3.205009798    | 0.02156655 | AC124016.1 | 4        | antisense               | uncharacterized LOC101928963 [Source:NCBI gene;Acc:101928963]                                  |
| 163     | ENSG00000272218 | 10.1315311 | 0.98600522 | 3.205009798    | 0.02156655 | AC108865.2 | 4        | lincRNA                 | novel transcript                                                                               |
| 164     | ENSG00000272108 | 10.1315311 | 0.98600522 | 3.205009798    | 0.02156655 | AC244517.1 | 5        | lincRNA                 | novel transcript                                                                               |
| 165     | ENSG00000131183 | 10.1315311 | 0.98600522 | 3.205009798    | 0.02156655 | SLC34A1    | 5        | protein_coding          | solute carrier family 34 member 1 [Source:HGNC Symbol;Acc:HGNC:105378949]                      |
| 166     | ENSG00000237669 | 10.1315311 | 0.98600522 | 3.205009798    | 0.02156655 | AL671277.2 | 6        | unprocessed_pseudogen   | HLA complex group 4 pseudogene 3                                                               |
| 167     | ENSG00000231245 | 10.1315311 | 0.98600522 | 3.205009798    | 0.02156655 | C1DP1      | 10       | processed_pseudogen     | C1D nuclear receptor corepressor pseudogene 1 [Source:HGNC Symbol;Acc:HGNC:105378949]          |
| 168     | ENSG00000246877 | 10.1315311 | 0.98600522 | 3.205009798    | 0.02156655 | DNM1P35    | 15       | antisense               | dynamitin 1 pseudogene 35 [Source:HGNC Symbol;Acc:HGNC:35182]                                  |
| 169     | ENSG00000125409 | 10.1315311 | 0.98600522 | 3.205009798    | 0.02156655 | TEKT3      | 17       | protein_coding          | tektin 3 [Source:HGNC Symbol;Acc:HGNC:14293]                                                   |
| 170     | ENSG00000199961 | 10.1315311 | 0.98600522 | 3.205009798    | 0.02156655 | SNORD1B    | 17       | snoRNA                  | small nucleolar RNA, C/D box 1B [Source:HGNC Symbol;Acc:HGNC:105378949]                        |
| 171     | ENSG00000265496 | 10.1315311 | 0.98600522 | 3.205009798    | 0.02156655 | AC100778.3 | 18       | antisense               | microRNA 1539                                                                                  |
| 172     | ENSG00000089163 | 34.4445615 | 11.8444089 | 1.5299744      | 0.02187215 | SIRT4      | 12       | protein_coding          | sirtuin 4 [Source:HGNC Symbol;Acc:HGNC:14932]                                                  |
| 173     | ENSG00000159261 | 36.4706477 | 12.8315343 | 1.49782874     | 0.02199107 | CLDN14     | 21       | protein_coding          | claudin 14 [Source:HGNC Symbol;Acc:HGNC:2035]                                                  |
| 174     | ENSG00000223764 | 7.09240497 | 1.39E-17   | 5.851378783    | 0.02267682 | LINC02593  | 1        | lincRNA                 | long intergenic non-protein coding RNA 2593 [Source:HGNC Symbol;Acc:HGNC:2593]                 |
| 175     | ENSG00000235145 | 7.09240497 | 1.39E-17   | 5.851378783    | 0.02267682 | RPSAP16    | 1        | processed_pseudogen     | ribosomal protein SA pseudogene 16 [Source:HGNC Symbol;Acc:HGNC:16711]                         |
| 176     | ENSG00000223450 | 7.09240497 | 1.39E-17   | 5.851378783    | 0.02267682 | AL590632.1 | 1        | processed_pseudogen     | ribosomal protein S24 (RPS24) pseudogene                                                       |
| 177     | ENSG00000271868 | 7.09240497 | 1.39E-17   | 5.851378783    | 0.02267682 | AC114810.1 | 2        | lincRNA                 | novel transcript                                                                               |
| 178     | ENSG00000171303 | 7.09240497 | 1.39E-17   | 5.851378783    | 0.02267682 | KCNK3      | 2        | protein_coding          | potassium two pore domain channel subfamily K member 3 [Source:HGNC Symbol;Acc:HGNC:14293]     |
| 179     | ENSG00000258881 | 7.09240497 | 1.39E-17   | 5.851378783    | 0.02267682 | AC007040.2 | 2        | protein_coding          | novel protein                                                                                  |
| 180     | ENSG00000273113 | 7.09240497 | 1.39E-17   | 5.851378783    | 0.02267682 | AC133528.1 | 2        | lincRNA                 | novel transcript                                                                               |
| 181     | ENSG00000188996 | 7.09240497 | 1.39E-17   | 5.851378783    | 0.02267682 | HUS1B      | 6        | protein_coding          | HUS1 checkpoint clamp component B [Source:HGNC Symbol;Acc:HGNC:105378949]                      |
| 182     | ENSG00000220920 | 7.09240497 | 1.39E-17   | 5.851378783    | 0.02267682 | AL023807.1 | 6        | unprocessed_pseudogen   | ribosomal protein S12 (RPS12) pseudogene                                                       |
| 183     | ENSG00000124496 | 7.09240497 | 1.39E-17   | 5.851378783    | 0.02267682 | TRERF1     | 6        | protein_coding          | transcriptional regulating factor 1 [Source:HGNC Symbol;Acc:HGNC:105378949]                    |
| 184     | ENSG00000229862 | 7.09240497 | 1.39E-17   | 5.851378783    | 0.02267682 | AL121972.1 | 6        | antisense               | novel transcript                                                                               |
| 185     | ENSG00000184530 | 7.09240497 | 1.39E-17   | 5.851378783    | 0.02267682 | C6orf58    | 6        | protein_coding          | chromosome 6 open reading frame 58 [Source:HGNC Symbol;Acc:HGNC:105378949]                     |
| 186     | ENSG00000128606 | 7.09240497 | 1.39E-17   | 5.851378783    | 0.02267682 | LRR17      | 7        | protein_coding          | leucine rich repeat containing 17 [Source:HGNC Symbol;Acc:HGNC:105378949]                      |
| 187     | ENSG00000183638 | 7.09240497 | 1.39E-17   | 5.851378783    | 0.02267682 | RP1L1      | 8        | protein_coding          | RP1 like 1 [Source:HGNC Symbol;Acc:HGNC:15946]                                                 |
| 188     | ENSG00000122711 | 7.09240497 | 1.39E-17   | 5.851378783    | 0.02267682 | SPINK4     | 9        | protein_coding          | serine peptidase inhibitor, Kazal type 4 [Source:HGNC Symbol;Acc:HGNC:105378949]               |
| 189     | ENSG00000165702 | 7.09240497 | 1.39E-17   | 5.851378783    | 0.02267682 | GFI1B      | 9        | protein_coding          | growth factor independent 1B transcriptional repressor [Source:HGNC Symbol;Acc:HGNC:105378949] |
| 190     | ENSG00000174885 | 7.09240497 | 1.39E-17   | 5.851378783    | 0.02267682 | NLRP6      | 11       | protein_coding          | NLR family pyrin domain containing 6 [Source:HGNC Symbol;Acc:HGNC:105378949]                   |
| 191     | ENSG00000254911 | 7.09240497 | 1.39E-17   | 5.851378783    | 0.02267682 | SCARNA9    | 11       | antisense               | small Cajal body-specific RNA 9 [Source:HGNC Symbol;Acc:HGNC:105378949]                        |
| 192     | ENSG00000256315 | 7.09240497 | 1.39E-17   | 5.851378783    | 0.02267682 | AP000462.2 | 11       | processed_transcript    | uncharacterized LOC105369507 [Source:NCBI gene;Acc:105369507]                                  |
| 193     | ENSG00000283095 | 7.09240497 | 1.39E-17   | 5.851378783    | 0.02267682 | FP565171.1 | 10       | lincRNA                 | novel transcript                                                                               |
| 194     | ENSG00000249628 | 7.09240497 | 1.39E-17   | 5.851378783    | 0.02267682 | LINC00942  | 12       | lincRNA                 | long intergenic non-protein coding RNA 942 [Source:HGNC Symbol;Acc:HGNC:105378949]             |
| 195     | ENSG00000212124 | 7.09240497 | 1.39E-17   | 5.851378783    | 0.02267682 | TAS2R19    | 12       | protein_coding          | taste 2 receptor member 19 [Source:HGNC Symbol;Acc:HGNC:1910]                                  |
| 196     | ENSG00000244712 | 7.09240497 | 1.39E-17   | 5.851378783    | 0.02267682 | AC084754.1 | 12       | processed_pseudogen     | ribosomal protein L29 (RPL29) pseudogene                                                       |
| 197     | ENSG00000139220 | 7.09240497 | 1.39E-17   | 5.851378783    | 0.02267682 | PPFIA2     | 12       | protein_coding          | PTPRF interacting protein alpha 2 [Source:HGNC Symbol;Acc:HGNC:105378949]                      |
| 198     | ENSG00000103313 | 7.09240497 | 1.39E-17   | 5.851378783    | 0.02267682 | MEFV       | 16       | protein_coding          | MEFV, pyrin innate immunity regulator [Source:HGNC Symbol;Acc:HGNC:105378949]                  |
| 199     | ENSG00000266667 | 7.09240497 | 1.39E-17   | 5.851378783    | 0.02267682 | AC005703.4 | 17       | lincRNA                 | novel transcript                                                                               |
| 200     | ENSG00000266865 | 7.09240497 | 1.39E-17   | 5.851378783    | 0.02267682 | AC138207.8 | 17       | transcribed_unprocessed | SMAD specific E3 ubiquitin protein ligase 2 (SMURF2) pseudogene                                |

| gene_id |                 | Proglumide | Control    | log2FoldChange | pvalue     | gene_name  |    | gene_chr                          | gene_biotype                                                                                  | gene_description |
|---------|-----------------|------------|------------|----------------|------------|------------|----|-----------------------------------|-----------------------------------------------------------------------------------------------|------------------|
| 201     | ENSG00000242852 | 7.09240497 | 1.39E-17   | 5.851378783    | 0.02267682 | ZNF709     | 19 | protein_coding                    | zinc finger protein 709 [Source:HGNC Symbol;Acc:HGNC:20629]                                   |                  |
| 202     | ENSG00000254760 | 7.09240497 | 1.39E-17   | 5.851378783    | 0.02267682 | AC008750.1 | 19 | antisense                         | novel transcript, antisense to SIGLEC10                                                       |                  |
| 203     | ENSG00000214093 | 7.09240497 | 1.39E-17   | 5.851378783    | 0.02267682 | AL096701.1 | 22 | processed_pseudogen               | ribosomal protein S18 (RPS18) pseudogene                                                      |                  |
| 204     | ENSG00000243811 | 7.09240497 | 1.39E-17   | 5.851378783    | 0.02267682 | APOBEC3D   | 22 | protein_coding                    | apolipoprotein B mRNA editing enzyme catalytic subunit 3D [Source:HGNC Symbol;Acc:HGNC:24381] |                  |
| 205     | ENSG00000273254 | 7.09240497 | 1.39E-17   | 5.851378783    | 0.02267682 | AF129075.2 | 21 | antisense                         | novel transcript, antisense to USP16                                                          |                  |
| 206     | ENSG00000156265 | 7.09240497 | 1.39E-17   | 5.851378783    | 0.02267682 | MAP3K7CL   | 21 | protein_coding                    | MAP3K7 C-terminal like [Source:HGNC Symbol;Acc:HGNC:16457]                                    |                  |
| 207     | ENSG00000178597 | 17.2228299 | 3.94739696 | 2.090326405    | 0.02307085 | PSAPL1     | 4  | protein_coding                    | prosaposin like 1 (gene/pseudogene) [Source:HGNC Symbol;Acc:HGNC:21785]                       |                  |
| 208     | ENSG00000196787 | 17.2228299 | 3.94739696 | 2.090326405    | 0.02307085 | HIST1H2AG  | 6  | protein_coding                    | histone cluster 1 H2A family member g [Source:HGNC Symbol;Acc:HGNC:21967]                     |                  |
| 209     | ENSG00000133665 | 17.2228299 | 3.94739696 | 2.090326405    | 0.02307085 | DYDC2      | 10 | protein_coding                    | DPY30 domain containing 2 [Source:HGNC Symbol;Acc:HGNC:23465]                                 |                  |
| 210     | ENSG00000262188 | 17.2228299 | 3.94739696 | 2.090326405    | 0.02307085 | LINC01978  | 17 | lincRNA                           | long intergenic non-protein coding RNA 1978 [Source:HGNC Symbol;Acc:HGNC:26218]               |                  |
| 211     | ENSG00000004766 | 284.666222 | 142.144887 | 1.001257919    | 0.02308612 | VPS50      | 7  | protein_coding                    | VPS50, EARP/GARPII complex subunit [Source:HGNC Symbol;Acc:HGNC:20047]                        |                  |
| 212     | ENSG00000138772 | 143.853222 | 69.0976534 | 1.05650111     | 0.02398039 | ANXA3      | 4  | protein_coding                    | annexin A3 [Source:HGNC Symbol;Acc:HGNC:541]                                                  |                  |
| 213     | ENSG00000100079 | 115.488013 | 54.2907814 | 1.087164634    | 0.02432645 | LGALS2     | 22 | protein_coding                    | galectin 2 [Source:HGNC Symbol;Acc:HGNC:6562]                                                 |                  |
| 214     | ENSG00000172167 | 178.29669  | 86.8658997 | 1.036327961    | 0.02454774 | MTBP       | 8  | protein_coding                    | MDM2 binding protein [Source:HGNC Symbol;Acc:HGNC:7417]                                       |                  |
| 215     | ENSG00000138315 | 80.0315029 | 36.5225344 | 1.129041388    | 0.02523952 | OIT3       | 10 | protein_coding                    | oncoprotein induced transcript 3 [Source:HGNC Symbol;Acc:HGNC:21383]                          |                  |
| 216     | ENSG00000204272 | 78.0054165 | 35.5354095 | 1.131497308    | 0.02543552 | NBDY       | X  | protein_coding                    | negative regulator of P-body association [Source:HGNC Symbol;Acc:HGNC:20427]                  |                  |
| 217     | ENSG00000256591 | 21.2750017 | 5.92165277 | 1.823068794    | 0.0254753  | AP003108.2 | 11 | protein_coding                    | novel transcript                                                                              |                  |
| 218     | ENSG00000104371 | 48.6271652 | 19.7414106 | 1.295024385    | 0.02548509 | DKK4       | 8  | protein_coding                    | dickkopf WNT signaling pathway inhibitor 4 [Source:HGNC Symbol;Acc:HGNC:5437]                 |                  |
| 219     | ENSG00000064886 | 23.3010877 | 6.90877955 | 1.735453749    | 0.02610533 | CHI3L2     | 1  | protein_coding                    | chitinase 3 like 2 [Source:HGNC Symbol;Acc:HGNC:1933]                                         |                  |
| 220     | ENSG00000240602 | 23.3010877 | 6.90877955 | 1.735453749    | 0.02610533 | AADACP1    | 3  | transcribed_unprocessed_pseudogen | arylacetamide deacetylase pseudogene 1 [Source:HGNC Symbol;Acc:HGNC:24060]                    |                  |
| 221     | ENSG00000106560 | 23.3010877 | 6.90877955 | 1.735453749    | 0.02610533 | GIMAP2     | 7  | protein_coding                    | GTPase, IMAP family member 2 [Source:HGNC Symbol;Acc:HGNC:21065]                              |                  |
| 222     | ENSG00000232807 | 23.3010877 | 6.90877955 | 1.735453749    | 0.02610533 | AL137186.2 | 10 | antisense                         | uncharacterized LOC105376384 [Source:NCBI gene;Acc:105376384]                                 |                  |
| 223     | ENSG00000197903 | 69.9010713 | 30.5997851 | 1.188416152    | 0.02630001 | HIST1H2BK  | 6  | protein_coding                    | histone cluster 1 H2B family member k [Source:HGNC Symbol;Acc:HGNC:21903]                     |                  |
| 224     | ENSG00000069812 | 25.3271738 | 7.89590589 | 1.665694583    | 0.02649769 | HES2       | 1  | protein_coding                    | hes family bHLH transcription factor 2 [Source:HGNC Symbol;Acc:HGNC:5981]                     |                  |
| 225     | ENSG00000228705 | 25.3271738 | 7.89590589 | 1.665694583    | 0.02649769 | LINC00659  | 20 | antisense                         | long intergenic non-protein coding RNA 659 [Source:HGNC Symbol;Acc:HGNC:22870]                |                  |
| 226     | ENSG00000082196 | 33.4315184 | 11.8444089 | 1.487063742    | 0.02678003 | C1QTNF3    | 5  | protein_coding                    | C1q and TNF related 3 [Source:HGNC Symbol;Acc:HGNC:14326]                                     |                  |
| 227     | ENSG00000145391 | 29.379346  | 9.87015775 | 1.561416423    | 0.02682007 | SETD7      | 4  | protein_coding                    | SET domain containing lysine methyltransferase 7 [Source:HGNC Symbol;Acc:HGNC:14539]          |                  |
| 228     | ENSG00000184451 | 29.379346  | 9.87015775 | 1.561416423    | 0.02682007 | CCR10      | 17 | protein_coding                    | C-C motif chemokine receptor 10 [Source:HGNC Symbol;Acc:HGNC:21845]                           |                  |
| 229     | ENSG00000151623 | 12.157616  | 1.97313462 | 2.548549293    | 0.02704271 | NR3C2      | 4  | protein_coding                    | nuclear receptor subfamily 3 group C member 2 [Source:HGNC Symbol;Acc:HGNC:15162]             |                  |
| 230     | ENSG00000231167 | 12.157616  | 1.97313462 | 2.548549293    | 0.02704271 | YBX1P2     | 7  | processed_pseudogen               | Y-box binding protein 1 pseudogene 2 [Source:HGNC Symbol;Acc:HGNC:23116]                      |                  |
| 231     | ENSG00000285106 | 12.157616  | 1.97313462 | 2.548549293    | 0.02704271 | AC016831.6 | 7  | lincRNA                           | novel transcript                                                                              |                  |
| 232     | ENSG00000232815 | 12.157616  | 1.97313462 | 2.548549293    | 0.02704271 | DUX4L50    | 9  | unprocessed_pseudogen             | double homeobox 4 like 50 (pseudogene) [Source:HGNC Symbol;Acc:HGNC:23281]                    |                  |
| 233     | ENSG00000165474 | 12.157616  | 1.97313462 | 2.548549293    | 0.02704271 | GJB2       | 13 | protein_coding                    | gap junction protein beta 2 [Source:HGNC Symbol;Acc:HGNC:4284]                                |                  |
| 234     | ENSG00000132517 | 12.157616  | 1.97313462 | 2.548549293    | 0.02704271 | SLC52A1    | 17 | protein_coding                    | solute carrier family 52 member 1 [Source:HGNC Symbol;Acc:HGNC:13251]                         |                  |
| 235     | ENSG00000277806 | 12.157616  | 1.97313462 | 2.548549293    | 0.02704271 | AC006213.4 | 19 | sense_intronic                    | novel transcript, sense intronic to ZNF155                                                    |                  |
| 236     | ENSG00000236753 | 117.5141   | 56.265031  | 1.060814698    | 0.02757963 | MKLN1-AS   | 7  | processed_transcript              | MKLN1 antisense RNA [Source:HGNC Symbol;Acc:HGNC:40374]                                       |                  |
| 237     | ENSG00000104427 | 105.357582 | 50.3422821 | 1.063538799    | 0.02894954 | ZC2HC1A    | 8  | protein_coding                    | zinc finger C2HC-type containing 1A [Source:HGNC Symbol;Acc:HGNC:10442]                       |                  |
| 238     | ENSG00000148908 | 70.9141145 | 31.58691   | 1.163517644    | 0.028989   | RGS10      | 10 | protein_coding                    | regulator of G protein signaling 10 [Source:HGNC Symbol;Acc:HGNC:14890]                       |                  |
| 239     | ENSG00000164695 | 180.322776 | 89.827274  | 1.004323733    | 0.02908983 | CHMP4C     | 8  | protein_coding                    | charged multivesicular body protein 4C [Source:HGNC Symbol;Acc:HGNC:16469]                    |                  |
| 240     | ENSG0000023445  | 82.0575892 | 38.4967841 | 1.089358586    | 0.0299605  | BIRC3      | 11 | protein_coding                    | baculoviral IAP repeat containing 3 [Source:HGNC Symbol;Acc:HGNC:23445]                       |                  |



| gene_id | Proglumide      | Control    | log2FoldChange | pvalue      | gene_name             | gene_chr | gene_biotype         | gene_description                                                   |
|---------|-----------------|------------|----------------|-------------|-----------------------|----------|----------------------|--------------------------------------------------------------------|
| 241     | ENSG00000116299 | 14.1837014 | 2.96026697     | 2.212801031 | 0.03034815 KIAA1324   | 1        | protein_coding       | KIAA1324 [Source:HGNC Symbol;Acc:HGNC:29618]                       |
| 242     | ENSG00000280120 | 40.5228202 | 15.7929101     | 1.352390377 | 0.0311037 AC073857.1  | 12       | TEC                  | novel transcript                                                   |
| 243     | ENSG00000096872 | 144.866265 | 72.0590278     | 1.006182082 | 0.03117997 IFT74      | 9        | protein_coding       | intraflagellar transport 74 [Source:HGNC Symbol;Acc:HGNC:21424]    |
| 244     | ENSG00000234160 | 58.7575966 | 25.6641605     | 1.190989422 | 0.03121597 AL513165.1 | 9        | antisense            | novel transcript                                                   |
| 245     | ENSG00000167384 | 102.318452 | 49.3551573     | 1.049859035 | 0.03151617 ZNF180     | 19       | protein_coding       | zinc finger protein 180 [Source:HGNC Symbol;Acc:HGNC:12970]        |
| 246     | ENSG00000213759 | 38.4967339 | 14.8057849     | 1.370977704 | 0.0315204 UGT2B11     | 4        | protein_coding       | UDP glucuronosyltransferase family 2 member B11 [Source:HGNC :     |
| 247     | ENSG00000154016 | 36.4706477 | 13.8186597     | 1.391907899 | 0.03194235 GRAP       | 17       | protein_coding       | GRB2 related adaptor protein [Source:HGNC Symbol;Acc:HGNC:456      |
| 248     | ENSG00000112406 | 16.209787  | 3.94739696     | 2.003513114 | 0.03229224 HECA       | 6        | protein_coding       | hdc homolog, cell cycle regulator [Source:HGNC Symbol;Acc:HGNC:    |
| 249     | ENSG00000147003 | 16.209787  | 3.94739696     | 2.003513114 | 0.03229224 CLTRN      | X        | protein_coding       | collectrin, amino acid transport regulator [Source:HGNC Symbol;Ac  |
| 250     | ENSG00000282021 | 16.209787  | 3.94739696     | 2.003513114 | 0.03229224 AC100810.3 | 8        | lincRNA              | novel transcript                                                   |
| 251     | ENSG00000262692 | 34.4445615 | 12.8315343     | 1.415656407 | 0.03236431 AC116914.2 | 17       | antisense            | novel transcript, antisense to ITGAE                               |
| 252     | ENSG00000278611 | 34.4445615 | 12.8315343     | 1.415656407 | 0.03236431 ZNF426-DT  | 19       | lincRNA              | ZNF426 divergent transcript [Source:HGNC Symbol;Acc:HGNC:5377      |
| 253     | ENSG00000189164 | 65.8488987 | 29.6126602     | 1.149528071 | 0.0331458 ZNF527      | 19       | protein_coding       | zinc finger protein 527 [Source:HGNC Symbol;Acc:HGNC:29385]        |
| 254     | ENSG00000079557 | 30.3923891 | 10.8572834     | 1.474259593 | 0.03317368 AFM        | 4        | protein_coding       | afamin [Source:HGNC Symbol;Acc:HGNC:316]                           |
| 255     | ENSG00000276538 | 18.2358728 | 4.93452536     | 1.859163554 | 0.03337634 AC092666.2 | 7        | unprocessed_pseudog  | dipeptidyl-peptidase 6 (DPP6) pseudogene                           |
| 256     | ENSG00000257475 | 18.2358728 | 4.93452536     | 1.859163554 | 0.03337634 AC068888.2 | 12       | sense_intronic       | novel transcript                                                   |
| 257     | ENSG00000225111 | 28.3663029 | 9.87015775     | 1.511008616 | 0.03353309 AC083900.1 | 2        | sense_intronic       | novel transcript                                                   |
| 258     | ENSG00000255471 | 20.2619587 | 5.92165277     | 1.753100738 | 0.03391022 AP001528.2 | 11       | antisense            | novel transcript                                                   |
| 259     | ENSG00000281005 | 20.2619587 | 5.92165277     | 1.753100738 | 0.03391022 LINC00921  | 16       | lincRNA              | long intergenic non-protein coding RNA 921 [Source:HGNC Symbol;    |
| 260     | ENSG00000267508 | 20.2619587 | 5.92165277     | 1.753100738 | 0.03391022 ZNF285     | 19       | protein_coding       | zinc finger protein 285 [Source:HGNC Symbol;Acc:HGNC:13079]        |
| 261     | ENSG00000253816 | 24.3141307 | 7.89590589     | 1.607096074 | 0.03403535 AC138866.1 | 5        | unprocessed_pseudog  | glucuronidase, beta (GUSB) pseudogene                              |
| 262     | ENSG00000204060 | 9.11848879 | 0.98600522     | 3.054959057 | 0.0348666 FOXO6       | 1        | protein_coding       | forkhead box O6 [Source:HGNC Symbol;Acc:HGNC:24814]                |
| 263     | ENSG00000240038 | 9.11848879 | 0.98600522     | 3.054959057 | 0.0348666 AMY2B       | 1        | protein_coding       | amylase, alpha 2B (pancreatic) [Source:HGNC Symbol;Acc:HGNC:4      |
| 264     | ENSG00000248307 | 9.11848879 | 0.98600522     | 3.054959057 | 0.0348666 LINC00616   | 4        | lincRNA              | long intergenic non-protein coding RNA 616 [Source:HGNC Symbo      |
| 265     | ENSG00000213433 | 9.11848879 | 0.98600522     | 3.054959057 | 0.0348666 RPLP1P6     | 5        | transcribed_processe | ribosomal protein lateral stalk subunit P1 pseudogene 6 [Source:if |
| 266     | ENSG00000179101 | 9.11848879 | 0.98600522     | 3.054959057 | 0.0348666 AL590139.1  | X        | processed_pseudogen  | H3 histone, family 3B (H3.3B) (H3F3B) pseudogene                   |
| 267     | ENSG00000068976 | 9.11848879 | 0.98600522     | 3.054959057 | 0.0348666 PYGM        | 11       | protein_coding       | glycogen phosphorylase, muscle associated [Source:HGNC Symbo       |
| 268     | ENSG00000151067 | 9.11848879 | 0.98600522     | 3.054959057 | 0.0348666 CACNA1C     | 12       | protein_coding       | calcium voltage-gated channel subunit alpha1 C [Source:HGNC Sy     |
| 269     | ENSG00000236617 | 9.11848879 | 0.98600522     | 3.054959057 | 0.0348666 AC127070.1  | 12       | antisense            | uncharacterized LOC101928530 [Source:NCBI gene;Acc:10192853        |
| 270     | ENSG00000261863 | 9.11848879 | 0.98600522     | 3.054959057 | 0.0348666 LINC01996   | 17       | lincRNA              | long intergenic non-protein coding RNA 1996 [Source:HGNC Symb      |
| 271     | ENSG00000223573 | 9.11848879 | 0.98600522     | 3.054959057 | 0.0348666 TINCR       | 19       | protein_coding       | TINCR ubiquitin domain containing [Source:HGNC Symbol;Acc:HGI      |
| 272     | ENSG00000234753 | 119.540186 | 59.2264054     | 1.011610084 | 0.03504522 FOXP4-AS1  | 6        | antisense            | FOXP4 antisense RNA 1 [Source:HGNC Symbol;Acc:HGNC:50332]          |
| 273     | ENSG00000235689 | 42.5489064 | 17.7671604     | 1.253902591 | 0.03548196 AC253536.4 | 22       | unprocessed_pseudog  | glutathione S-transferase (GST) theta pseudogene                   |
| 274     | ENSG00000119913 | 80.0315029 | 38.4967841     | 1.05334488  | 0.03607543 TECTB      | 10       | protein_coding       | tectorin beta [Source:HGNC Symbol;Acc:HGNC:11721]                  |
| 275     | ENSG00000225335 | 37.4836908 | 14.8057849     | 1.332629742 | 0.03762082 AC016027.1 | 22       | antisense            | novel transcript                                                   |
| 276     | ENSG00000228889 | 73.9532439 | 35.5354095     | 1.054661786 | 0.03779259 UBAC2-AS1  | 13       | lincRNA              | UBAC2 antisense RNA 1 [Source:HGNC Symbol;Acc:HGNC:42502]          |
| 277     | ENSG00000260563 | 73.9532439 | 35.5354095     | 1.054661786 | 0.03779259 AC132872.1 | 17       | lincRNA              | novel transcript                                                   |
| 278     | ENSG00000264920 | 67.874985  | 31.58691       | 1.100437472 | 0.03981104 AC018521.5 | 17       | processed_transcript | uncharacterized LOC102724532 [Source:NCBI gene;Acc:10272453        |
| 279     | ENSG00000232560 | 31.4054322 | 11.8444089     | 1.397212591 | 0.04010141 LINC01549  | 21       | lincRNA              | long intergenic non-protein coding RNA 1549 [Source:HGNC Symb      |
| 280     | ENSG00000116544 | 6.07936364 | 1.39E-17       | 5.633145053 | 0.04096458 DLGAP3     | 1        | protein_coding       | DLG associated protein 3 [Source:HGNC Symbol;Acc:HGNC:30368]       |



| gene_id | Proglumide      | Control    | log2FoldChange | pvalue      | gene_name  | gene_chr   | gene_biotype | gene_description                                                                   |
|---------|-----------------|------------|----------------|-------------|------------|------------|--------------|------------------------------------------------------------------------------------|
| 281     | ENSG00000234315 | 6.07936364 | 1.39E-17       | 5.633145053 | 0.04096458 | OSTCP5     | 1            | processed_pseudogenoligosaccharyltransferase complex subunit pseudogene 5 [Source  |
| 282     | ENSG00000280836 | 6.07936364 | 1.39E-17       | 5.633145053 | 0.04096458 | AL355480.1 | 1            | pseudogene                                                                         |
| 283     | ENSG00000236915 | 6.07936364 | 1.39E-17       | 5.633145053 | 0.04096458 | AL356270.1 | 1            | antisense                                                                          |
| 284     | ENSG00000225568 | 6.07936364 | 1.39E-17       | 5.633145053 | 0.04096458 | AC093155.1 | 1            | processed_pseudogenepseudogene similar to part of SUMO-1 activating enzyme subunit |
| 285     | ENSG00000228955 | 6.07936364 | 1.39E-17       | 5.633145053 | 0.04096458 | AL591623.2 | 1            | processed_pseudogeneribosomal protein L7a (RPL7A) pseudogene                       |
| 286     | ENSG00000181378 | 6.07936364 | 1.39E-17       | 5.633145053 | 0.04096458 | CFAP65     | 2            | protein_coding                                                                     |
| 287     | ENSG00000168427 | 6.07936364 | 1.39E-17       | 5.633145053 | 0.04096458 | KLHL30     | 2            | protein_coding                                                                     |
| 288     | ENSG00000239462 | 6.07936364 | 1.39E-17       | 5.633145053 | 0.04096458 | AC091212.1 | 3            | antisense                                                                          |
| 289     | ENSG00000174500 | 6.07936364 | 1.39E-17       | 5.633145053 | 0.04096458 | GCSAM      | 3            | protein_coding                                                                     |
| 290     | ENSG00000284624 | 6.07936364 | 1.39E-17       | 5.633145053 | 0.04096458 | AC092902.5 | 3            | processed_transcript                                                               |
| 291     | ENSG00000250012 | 6.07936364 | 1.39E-17       | 5.633145053 | 0.04096458 | AC079848.1 | 3            | antisense                                                                          |
| 292     | ENSG00000283175 | 6.07936364 | 1.39E-17       | 5.633145053 | 0.04096458 | AC007920.2 | 3            | antisense                                                                          |
| 293     | ENSG00000198471 | 6.07936364 | 1.39E-17       | 5.633145053 | 0.04096458 | RTP2       | 3            | protein_coding                                                                     |
| 294     | ENSG00000198515 | 6.07936364 | 1.39E-17       | 5.633145053 | 0.04096458 | CNGA1      | 4            | protein_coding                                                                     |
| 295     | ENSG00000245293 | 6.07936364 | 1.39E-17       | 5.633145053 | 0.04096458 | AC096564.1 | 4            | antisense                                                                          |
| 296     | ENSG00000249532 | 6.07936364 | 1.39E-17       | 5.633145053 | 0.04096458 | AC106864.1 | 4            | antisense                                                                          |
| 297     | ENSG00000207559 | 6.07936364 | 1.39E-17       | 5.633145053 | 0.04096458 | MIR578     | 4            | miRNA                                                                              |
| 298     | ENSG00000218336 | 6.07936364 | 1.39E-17       | 5.633145053 | 0.04096458 | TENM3      | 4            | protein_coding                                                                     |
| 299     | ENSG00000249679 | 6.07936364 | 1.39E-17       | 5.633145053 | 0.04096458 | AC106897.1 | 4            | antisense                                                                          |
| 300     | ENSG00000253744 | 6.07936364 | 1.39E-17       | 5.633145053 | 0.04096458 | AC025442.1 | 5            | antisense                                                                          |
| 301     | ENSG00000251467 | 6.07936364 | 1.39E-17       | 5.633145053 | 0.04096458 | AC020893.2 | 5            | processed_pseudogenedullard homolog (Xenopus laevis) (DULLARD) pseudogene          |
| 302     | ENSG00000285190 | 6.07936364 | 1.39E-17       | 5.633145053 | 0.04096458 | AC018754.1 | 5            | antisense                                                                          |
| 303     | ENSG00000252464 | 6.07936364 | 1.39E-17       | 5.633145053 | 0.04096458 | RN7SKP70   | 5            | misc_RNA                                                                           |
| 304     | ENSG00000274997 | 6.07936364 | 1.39E-17       | 5.633145053 | 0.04096458 | HIST1H2AH  | 6            | protein_coding                                                                     |
| 305     | ENSG00000261068 | 6.07936364 | 1.39E-17       | 5.633145053 | 0.04096458 | AL512274.1 | 6            | lincRNA                                                                            |
| 306     | ENSG00000177688 | 6.07936364 | 1.39E-17       | 5.633145053 | 0.04096458 | SUMO4      | 6            | protein_coding                                                                     |
| 307     | ENSG00000230914 | 6.07936364 | 1.39E-17       | 5.633145053 | 0.04096458 | AC004840.1 | 7            | transcribed_unitary_p:kinesin family member pseudogene                             |
| 308     | ENSG00000253250 | 6.07936364 | 1.39E-17       | 5.633145053 | 0.04096458 | C8orf88    | 8            | protein_coding                                                                     |
| 309     | ENSG00000279137 | 6.07936364 | 1.39E-17       | 5.633145053 | 0.04096458 | AL356309.3 | 9            | TEC                                                                                |
| 310     | ENSG00000255010 | 6.07936364 | 1.39E-17       | 5.633145053 | 0.04096458 | AP001767.2 | 11           | processed_pseudogenecytochrome c oxidase subunit Vb (COX5B) pseudogene             |
| 311     | ENSG00000137673 | 6.07936364 | 1.39E-17       | 5.633145053 | 0.04096458 | MMP7       | 11           | protein_coding                                                                     |
| 312     | ENSG00000255669 | 6.07936364 | 1.39E-17       | 5.633145053 | 0.04096458 | ITFG2-AS1  | 12           | transcribed_unitary_p:ITFG2 antisense RNA 1 [Source:NCBI gene;Acc:283440]          |
| 313     | ENSG00000226711 | 6.07936364 | 1.39E-17       | 5.633145053 | 0.04096458 | FAM66C     | 12           | antisense                                                                          |
| 314     | ENSG00000259584 | 6.07936364 | 1.39E-17       | 5.633145053 | 0.04096458 | AC021755.2 | 15           | lincRNA                                                                            |
| 315     | ENSG00000259545 | 6.07936364 | 1.39E-17       | 5.633145053 | 0.04096458 | AC013452.1 | 15           | processed_pseudogeneribosomal protein L15 (RPL15) pseudogene                       |
| 316     | ENSG00000104043 | 6.07936364 | 1.39E-17       | 5.633145053 | 0.04096458 | ATP8B4     | 15           | protein_coding                                                                     |
| 317     | ENSG00000260339 | 6.07936364 | 1.39E-17       | 5.633145053 | 0.04096458 | HEXA-AS1   | 15           | antisense                                                                          |
| 318     | ENSG00000234719 | 6.07936364 | 1.39E-17       | 5.633145053 | 0.04096458 | NPIPB2     | 16           | protein_coding                                                                     |
| 319     | ENSG00000259940 | 6.07936364 | 1.39E-17       | 5.633145053 | 0.04096458 | AC109449.1 | 16           | antisense                                                                          |
| 320     | ENSG00000149926 | 6.07936364 | 1.39E-17       | 5.633145053 | 0.04096458 | FAM57B     | 16           | protein_coding                                                                     |

| gene_id | Proglumide      |            | Control    | log2FoldChange | pvalue     | gene_name   |  | gene_chr | gene_biotype                     | gene_description                                                                                             |
|---------|-----------------|------------|------------|----------------|------------|-------------|--|----------|----------------------------------|--------------------------------------------------------------------------------------------------------------|
| 321     | ENSG00000103089 | 6.07936364 | 1.39E-17   | 5.633145053    | 0.04096458 | FA2H        |  | 16       | protein_coding                   | fatty acid 2-hydroxylase [Source:HGNC Symbol;Acc:HGNC:21197]                                                 |
| 322     | ENSG00000260229 | 6.07936364 | 1.39E-17   | 5.633145053    | 0.04096458 | PPIAP51     |  | 16       | processed_pseudogen              | peptidylprolyl isomerase A pseudogene 51 [Source:HGNC Symbol;Acc:HGNC:21197]                                 |
| 323     | ENSG00000131096 | 6.07936364 | 1.39E-17   | 5.633145053    | 0.04096458 | PYY         |  | 17       | protein_coding                   | peptide YY [Source:HGNC Symbol;Acc:HGNC:9748]                                                                |
| 324     | ENSG00000277249 | 6.07936364 | 1.39E-17   | 5.633145053    | 0.04096458 | MIR6784     |  | 17       | miRNA                            | microRNA 6784 [Source:HGNC Symbol;Acc:HGNC:49988]                                                            |
| 325     | ENSG00000272386 | 6.07936364 | 1.39E-17   | 5.633145053    | 0.04096458 | AC015802.5  |  | 17       | sense_intronic                   | novel transcript, sense intronic to PRCD                                                                     |
| 326     | ENSG00000196361 | 6.07936364 | 1.39E-17   | 5.633145053    | 0.04096458 | ELAVL3      |  | 19       | protein_coding                   | ELAV like RNA binding protein 3 [Source:HGNC Symbol;Acc:HGNC:33:260229]                                      |
| 327     | ENSG00000267218 | 6.07936364 | 1.39E-17   | 5.633145053    | 0.04096458 | AC005336.2  |  | 19       | processed_pseudogen              | polymerase (RNA) mitochondrial (DNA directed) (POLRMT) pseudogene 2 [Source:HGNC Symbol;Acc:HGNC:267218]     |
| 328     | ENSG00000160460 | 6.07936364 | 1.39E-17   | 5.633145053    | 0.04096458 | SPTBN4      |  | 19       | protein_coding                   | spectrin beta, non-erythrocytic 4 [Source:HGNC Symbol;Acc:HGNC:1460460]                                      |
| 329     | ENSG00000260101 | 29.379346  | 10.8572834 | 1.425553737    | 0.04099352 | AC008074.2  |  | 2        | lincRNA                          | uncharacterized LOC101927402 [Source:NCBI gene;Acc:101927402]                                                |
| 330     | ENSG00000224459 | 11.1445735 | 1.97313462 | 2.424352556    | 0.04103203 | SLC25A34-AS |  | 1        | antisense                        | SLC25A34 and TMEM82 antisense RNA 1 [Source:HGNC Symbol;Acc:HGNC:224459]                                     |
| 331     | ENSG00000175920 | 11.1445735 | 1.97313462 | 2.424352556    | 0.04103203 | DOK7        |  | 4        | protein_coding                   | docking protein 7 [Source:HGNC Symbol;Acc:HGNC:26594]                                                        |
| 332     | ENSG00000232946 | 11.1445735 | 1.97313462 | 2.424352556    | 0.04103203 | AL354707.3  |  | 9        | processed_pseudogen              | 60S ribosomal protein L35a (RPL35A) pseudogene                                                               |
| 333     | ENSG00000079337 | 11.1445735 | 1.97313462 | 2.424352556    | 0.04103203 | RAPGEF3     |  | 12       | protein_coding                   | Rap guanine nucleotide exchange factor 3 [Source:HGNC Symbol;Acc:HGNC:79337]                                 |
| 334     | ENSG00000258900 | 11.1445735 | 1.97313462 | 2.424352556    | 0.04103203 | HNRNPCP1    |  | 14       | processed_pseudogen              | heterogeneous nuclear ribonucleoprotein C pseudogene 1 [Source:HGNC Symbol;Acc:HGNC:258900]                  |
| 335     | ENSG00000268182 | 11.1445735 | 1.97313462 | 2.424352556    | 0.04103203 | SMIM17      |  | 19       | protein_coding                   | small integral membrane protein 17 [Source:HGNC Symbol;Acc:HGNC:268182]                                      |
| 336     | ENSG00000158246 | 25.3271738 | 8.88303193 | 1.49826935     | 0.04281416 | TENT5B      |  | 1        | protein_coding                   | terminal nucleotidyltransferase 5B [Source:HGNC Symbol;Acc:HGNC:158246]                                      |
| 337     | ENSG00000162032 | 25.3271738 | 8.88303193 | 1.49826935     | 0.04281416 | SPSB3       |  | 16       | protein_coding                   | splA/ryanodine receptor domain and SOCS box containing 3 [Source:HGNC Symbol;Acc:HGNC:162032]                |
| 338     | ENSG00000178096 | 87.122805  | 43.4324083 | 1.002147005    | 0.04339667 | BOLA1       |  | 1        | protein_coding                   | bola family member 1 [Source:HGNC Symbol;Acc:HGNC:24263]                                                     |
| 339     | ENSG00000087245 | 38.4967339 | 15.7929101 | 1.278623267    | 0.04368423 | MMP2        |  | 16       | protein_coding                   | matrix metalloproteinase 2 [Source:HGNC Symbol;Acc:HGNC:7166]                                                |
| 340     | ENSG00000134668 | 13.1706587 | 2.96026697 | 2.106854979    | 0.04399131 | SPOCD1      |  | 1        | protein_coding                   | SPOC domain containing 1 [Source:HGNC Symbol;Acc:HGNC:26338]                                                 |
| 341     | ENSG00000261186 | 13.1706587 | 2.96026697 | 2.106854979    | 0.04399131 | LINC01238   |  | 2        | antisense                        | long intergenic non-protein coding RNA 1238 [Source:HGNC Symbol;Acc:HGNC:261186]                             |
| 342     | ENSG00000239445 | 13.1706587 | 2.96026697 | 2.106854979    | 0.04399131 | ST3GAL6-AS1 |  | 3        | antisense                        | ST3GAL6 antisense RNA 1 [Source:HGNC Symbol;Acc:HGNC:40828]                                                  |
| 343     | ENSG00000270558 | 13.1706587 | 2.96026697 | 2.106854979    | 0.04399131 | AC025449.1  |  | 5        | processed_pseudogen              | chromobox homolog 3 (CBX3) pseudogene                                                                        |
| 344     | ENSG00000247317 | 13.1706587 | 2.96026697 | 2.106854979    | 0.04399131 | LY6E-DT     |  | 8        | lincRNA                          | LY6E divergent transcript [Source:HGNC Symbol;Acc:HGNC:53728]                                                |
| 345     | ENSG00000270030 | 13.1706587 | 2.96026697 | 2.106854979    | 0.04399131 | AC136475.7  |  | 11       | lincRNA                          | novel transcript                                                                                             |
| 346     | ENSG00000272892 | 13.1706587 | 2.96026697 | 2.106854979    | 0.04399131 | AL133551.1  |  | 10       | lincRNA                          | novel transcript                                                                                             |
| 347     | ENSG00000266200 | 13.1706587 | 2.96026697 | 2.106854979    | 0.04399131 | PNLIPRP2    |  | 10       | polymorphic_pseudogen            | pancreatic lipase related protein 2 (gene/pseudogene) [Source:HGNC Symbol;Acc:HGNC:266200]                   |
| 348     | ENSG00000102539 | 13.1706587 | 2.96026697 | 2.106854979    | 0.04399131 | MLNR        |  | 13       | protein_coding                   | motilin receptor [Source:HGNC Symbol;Acc:HGNC:4495]                                                          |
| 349     | ENSG00000183921 | 13.1706587 | 2.96026697 | 2.106854979    | 0.04399131 | SDR42E2     |  | 16       | protein_coding                   | short chain dehydrogenase/reductase family 42E, member 2 [Source:HGNC Symbol;Acc:HGNC:183921]                |
| 350     | ENSG00000280278 | 13.1706587 | 2.96026697 | 2.106854979    | 0.04399131 | FLJ30679    |  | 16       | TEC                              | uncharacterized protein FLJ30679 [Source:NCBI gene;Acc:146512]                                               |
| 351     | ENSG00000182557 | 13.1706587 | 2.96026697 | 2.106854979    | 0.04399131 | SPNS3       |  | 17       | protein_coding                   | sphingolipid transporter 3 (putative) [Source:HGNC Symbol;Acc:HGNC:182557]                                   |
| 352     | ENSG00000105419 | 13.1706587 | 2.96026697 | 2.106854979    | 0.04399131 | MEIS3       |  | 19       | protein_coding                   | Meis homeobox 3 [Source:HGNC Symbol;Acc:HGNC:29537]                                                          |
| 353     | ENSG00000281538 | 13.1706587 | 2.96026697 | 2.106854979    | 0.04399131 | AC254562.3  |  | 22       | lincRNA                          | novel transcript                                                                                             |
| 354     | ENSG00000251495 | 21.2750017 | 6.90877955 | 1.604942157    | 0.04448909 | PPIAP11     |  | 5        | processed_pseudogen              | peptidylprolyl isomerase A pseudogene 11 [Source:HGNC Symbol;Acc:HGNC:251495]                                |
| 355     | ENSG00000249839 | 21.2750017 | 6.90877955 | 1.604942157    | 0.04448909 | AC011330.1  |  | 15       | unprocessed_pseudogen            | histidine acid phosphatase domain containing 2A (HISPPD2A) pseudogene 1 [Source:HGNC Symbol;Acc:HGNC:249839] |
| 356     | ENSG00000204103 | 21.2750017 | 6.90877955 | 1.604942157    | 0.04448909 | MAFB        |  | 20       | protein_coding                   | MAF bZIP transcription factor B [Source:HGNC Symbol;Acc:HGNC:64103]                                          |
| 357     | ENSG00000163453 | 55.7184672 | 25.6641605 | 1.114535173    | 0.0451174  | IGFBP7      |  | 4        | protein_coding                   | insulin like growth factor binding protein 7 [Source:HGNC Symbol;Acc:HGNC:163453]                            |
| 358     | ENSG00000277476 | 55.7184672 | 25.6641605 | 1.114535173    | 0.0451174  | AC005332.5  |  | 17       | lincRNA                          | novel transcript                                                                                             |
| 359     | ENSG00000131019 | 19.2489157 | 5.92165277 | 1.679565631    | 0.04511747 | ULBP3       |  | 6        | protein_coding                   | UL16 binding protein 3 [Source:HGNC Symbol;Acc:HGNC:14895]                                                   |
| 360     | ENSG00000230359 | 19.2489157 | 5.92165277 | 1.679565631    | 0.04511747 | TPI1P2      |  | 7        | transcribed_processed_transcript | triosephosphate isomerase 1 pseudogene 2 [Source:HGNC Symbol;Acc:HGNC:230359]                                |

| gene_id | Proglumide      | Control    | log2FoldChange | pvalue      | gene_name  | gene_chr   | gene_biotype | gene_description    |                                                                   |
|---------|-----------------|------------|----------------|-------------|------------|------------|--------------|---------------------|-------------------------------------------------------------------|
| 361     | ENSG00000104723 | 19.2489157 | 5.92165277     | 1.679565631 | 0.04511747 | TUSC3      | 8            | protein_coding      | tumor suppressor candidate 3 [Source:HGNC Symbol;Acc:HGNC:30242]  |
| 362     | ENSG00000232004 | 19.2489157 | 5.92165277     | 1.679565631 | 0.04511747 | CAP1P2     | 10           | processed_pseudogen | CAP1 pseudogene 2 [Source:HGNC Symbol;Acc:HGNC:31970]             |
| 363     | ENSG00000186642 | 15.1967442 | 3.94739696     | 1.911139514 | 0.04520218 | PDE2A      | 11           | protein_coding      | phosphodiesterase 2A [Source:HGNC Symbol;Acc:HGNC:8777]           |
| 364     | ENSG00000233695 | 15.1967442 | 3.94739696     | 1.911139514 | 0.04520218 | GAS6-AS1   | 13           | antisense           | GAS6 antisense RNA 1 [Source:HGNC Symbol;Acc:HGNC:39826]          |
| 365     | ENSG00000243708 | 15.1967442 | 3.94739696     | 1.911139514 | 0.04520218 | PLA2G4B    | 15           | protein_coding      | phospholipase A2 group IVB [Source:HGNC Symbol;Acc:HGNC:9036]     |
| 366     | ENSG00000250938 | 17.2228299 | 4.93452536     | 1.777279018 | 0.04543596 | AC108866.1 | 4            | antisense           | novel transcript, antisense to MAD2L1                             |
| 367     | ENSG00000188199 | 17.2228299 | 4.93452536     | 1.777279018 | 0.04543596 | NUTM2B     | 10           | protein_coding      | NUT family member 2B [Source:HGNC Symbol;Acc:HGNC:23445]          |
| 368     | ENSG00000240291 | 44.5749927 | 19.7414106     | 1.169829721 | 0.04593126 | AL450384.2 | 10           | antisense           | novel transcript, antisense to CACNB2                             |
| 369     | ENSG00000227502 | 67.874985  | 32.5740349     | 1.056215668 | 0.04802793 | LINC01268  | 6            | lincRNA             | long intergenic non-protein coding RNA 1268 [Source:HGNC Symbol;A |
| 370     | ENSG00000247011 | 30.3923891 | 11.8444089     | 1.350097503 | 0.04902819 | AC005920.1 | 17           | lincRNA             | novel transcript                                                  |



**Supplemental Table S4: Down- Regulated Genes Control Versus Proglumide**

| 1  | gene_id         | Proglumide | Control    | log2FoldCha | pvalue     | gene_name  | gene_chr | gene_biotype      | gene_description                                             |
|----|-----------------|------------|------------|-------------|------------|------------|----------|-------------------|--------------------------------------------------------------|
| 2  | ENSG00000154545 | 53.6923809 | 525.149298 | -3.2869594  | 9.91E-12   | MAGED4     | X        | protein_coding    | MAGE family member D4 [Source:HGNC Symbol;Acc:HGNC:2         |
| 3  | ENSG00000205670 | 6.07936364 | 96.7371475 | -3.9648531  | 9.72E-10   | SMIM11A    | 21       | protein_coding    | small integral membrane protein 11A [Source:HGNC Symbol      |
| 4  | ENSG00000230409 | 49.6402084 | 355.363838 | -2.8366312  | 4.06E-09   | TCEA1P2    | 3        | processed_pseud   | transcription elongation factor A1 pseudogene 2 [Source:HG   |
| 5  | ENSG00000108821 | 17.2228299 | 105.621271 | -2.6078863  | 1.87E-06   | COL1A1     | 17       | protein_coding    | collagen type I alpha 1 chain [Source:HGNC Symbol;Acc:HGNC   |
| 6  | ENSG00000272320 | 8.10544673 | 64.1620294 | -2.965704   | 3.39E-06   | AL445309.1 | 6        | antisense         | novel transcript, antisense to SLC22A23                      |
| 7  | ENSG00000205572 | 61.7967261 | 229.998992 | -1.8939262  | 5.56E-05   | SERF1B     | 5        | protein_coding    | small EDRK-rich factor 1B [Source:HGNC Symbol;Acc:HGNC:2     |
| 8  | ENSG00000188219 | 6.07936364 | 42.4452835 | -2.7787872  | 6.40E-05   | POTEE      | 2        | protein_coding    | POTE ankyrin domain family member E [Source:HGNC Symbol      |
| 9  | ENSG00000166507 | 1.01417189 | 22.7027856 | -4.3262449  | 7.35E-05   | NDST2      | 10       | protein_coding    | N-deacetylase and N-sulfotransferase 2 [Source:HGNC Symbl    |
| 10 | ENSG00000237399 | 1.39E-17   | 17.7671604 | -7.1614635  | 7.55E-05   | PITRM1-AS1 | 10       | antisense         | PITRM1 antisense RNA 1 [Source:HGNC Symbol;Acc:HGNC:4        |
| 11 | ENSG00000260075 | 3.04024516 | 29.6126602 | -3.2324674  | 0.00011173 | NSFP1      | 17       | unprocessed_pse   | N-ethylmaleimide-sensitive factor pseudogene 1 [Source:HG    |
| 12 | ENSG00000174501 | 32.4184753 | 124.376641 | -1.9357859  | 0.00011777 | ANKRD36C   | 2        | protein_coding    | ankyrin repeat domain 36C [Source:HGNC Symbol;Acc:HGNC       |
| 13 | ENSG00000263961 | 1.39E-17   | 16.7800353 | -7.079594   | 0.0001205  | RHEX       | 1        | protein_coding    | regulator of hemoglobinization and erythroid cell expansion  |
| 14 | ENSG00000261476 | 1.39E-17   | 16.7800353 | -7.079594   | 0.0001205  | AC009163.3 | 16       | sense_intronic    | novel transcript                                             |
| 15 | ENSG00000182463 | 6.07936364 | 39.4839089 | -2.6747682  | 0.00013752 | TSHZ2      | 20       | protein_coding    | teashirt zinc finger homeobox 2 [Source:HGNC Symbol;Acc:HGNC |
| 16 | ENSG00000233013 | 6.07936364 | 38.4967841 | -2.638359   | 0.00017814 | FAM157B    | 9        | transcribed_unpr  | family with sequence similarity 157 member B [Source:HGNC    |
| 17 | ENSG00000169894 | 1.39E-17   | 15.7929101 | -6.9927977  | 0.00019397 | MUC3A      | 7        | protein_coding    | mucin 3A, cell surface associated [Source:HGNC Symbol;Acc    |
| 18 | ENSG00000268521 | 1.39E-17   | 15.7929101 | -6.9927977  | 0.00019397 | VN1R83P    | 19       | unprocessed_pse   | vomeroneasal 1 receptor 83 pseudogene [Source:HGNC Symbl     |
| 19 | ENSG00000248318 | 3.04024516 | 26.6512854 | -3.0811379  | 0.00029975 | AC104958.1 | 8        | antisense         | uncharacterized LOC101927543 [Source:NCBI gene;Acc:101       |
| 20 | ENSG00000255566 | 1.39E-17   | 14.8057849 | -6.9004432  | 0.00031521 | AC135279.1 | 12       | processed_pseud   | mitochondrial ribosomal protein S25 (MRPS25) pseudogene      |
| 21 | ENSG00000272084 | 1.39E-17   | 13.8186597 | -6.8017699  | 0.00051726 | AL137127.1 | 1        | 3prime_overlappi  | novel transcript                                             |
| 22 | ENSG00000280392 | 1.39E-17   | 13.8186597 | -6.8017699  | 0.00051726 | AC007496.3 | 16       | TEC               | novel transcript                                             |
| 23 | ENSG00000108947 | 1.39E-17   | 13.8186597 | -6.8017699  | 0.00051726 | EFNB3      | 17       | protein_coding    | ephrin B3 [Source:HGNC Symbol;Acc:HGNC:3228]                 |
| 24 | ENSG00000171885 | 1.39E-17   | 13.8186597 | -6.8017699  | 0.00051726 | AQP4       | 18       | protein_coding    | aquaporin 4 [Source:HGNC Symbol;Acc:HGNC:637]                |
| 25 | ENSG00000268006 | 9.11848879 | 44.4195331 | -2.2689471  | 0.00051855 | PTOV1-AS1  | 19       | antisense         | PTOV1 antisense RNA 1 [Source:HGNC Symbol;Acc:HGNC:44        |
| 26 | ENSG00000166963 | 1.01417189 | 17.7671604 | -3.9748004  | 0.00057541 | MAP1A      | 15       | protein_coding    | microtubule associated protein 1A [Source:HGNC Symbol;Acc    |
| 27 | ENSG00000279476 | 1.01417189 | 17.7671604 | -3.9748004  | 0.00057541 | AC092139.3 | 16       | TEC               | novel transcript                                             |
| 28 | ENSG00000274292 | 4.05328324 | 27.6384104 | -2.7326455  | 0.00063679 | AC084018.2 | 12       | lincRNA           | novel transcript                                             |
| 29 | ENSG00000269821 | 719.26174  | 1956.48021 | -1.4435162  | 0.0006398  | KCNQ1OT1   | 11       | antisense         | KCNQ1 opposite strand/antisense transcript 1 [Source:HGNC    |
| 30 | ENSG00000230295 | 9.11848879 | 42.4452835 | -2.203547   | 0.00064876 | GTF2IP23   | 7        | unprocessed_pse   | general transcription factor Ili pseudogene 23 [Source:HGNC  |
| 31 | ENSG00000264268 | 2.02720959 | 20.7285356 | -3.277236   | 0.00073951 | MIR4767    | X        | miRNA             | microRNA 4767 [Source:HGNC Symbol;Acc:HGNC:41548]            |
| 32 | ENSG00000268189 | 2.02720959 | 20.7285356 | -3.277236   | 0.00073951 | AC005785.1 | 19       | processed_transc  | novel transcript, antisense to AKAP8 and AKAP8L              |
| 33 | ENSG00000274641 | 1.39E-17   | 12.8315343 | -6.695849   | 0.00085757 | HIST1H2BO  | 6        | protein_coding    | histone cluster 1 H2B family member o [Source:HGNC Symbol    |
| 34 | ENSG00000106031 | 1.39E-17   | 12.8315343 | -6.695849   | 0.00085757 | HOXA13     | 7        | protein_coding    | homeobox A13 [Source:HGNC Symbol;Acc:HGNC:5102]              |
| 35 | ENSG00000145002 | 1.39E-17   | 12.8315343 | -6.695849   | 0.00085757 | FAM86B2    | 8        | protein_coding    | family with sequence similarity 86 member B2 [Source:HGNC    |
| 36 | ENSG00000254013 | 1.39E-17   | 12.8315343 | -6.695849   | 0.00085757 | MAP2K1P1   | 8        | processed_pseud   | mitogen-activated protein kinase kinase 1 pseudogene 1 [Sc   |
| 37 | ENSG00000226981 | 1.39E-17   | 12.8315343 | -6.695849   | 0.00085757 | ABHD17AP6  | 17       | unprocessed_pse   | abhydrolase domain containing 17A pseudogene 6 [Source:HG    |
| 38 | ENSG00000209042 | 1.39E-17   | 12.8315343 | -6.695849   | 0.00085757 | SNORD12C   | 20       | snoRNA            | small nucleolar RNA, C/D box 12C [Source:HGNC Symbol;Acc     |
| 39 | ENSG00000236264 | 7.09240497 | 35.5354095 | -2.3050371  | 0.00086093 | RPL26P30   | 11       | transcribed_proci | ribosomal protein L26 pseudogene 30 [Source:HGNC Symbol      |
| 40 | ENSG00000218537 | 4.05328324 | 26.6512854 | -2.6804186  | 0.00087204 | MIF-AS1    | 22       | antisense         | MIF antisense RNA 1 [Source:HGNC Symbol;Acc:HGNC:27665]      |

|    |                 |            |            |            |            |            |    |                   |                                                                                              |
|----|-----------------|------------|------------|------------|------------|------------|----|-------------------|----------------------------------------------------------------------------------------------|
| 41 | ENSG00000233654 | 1.01417189 | 16.7800353 | -3.8929309 | 0.00088486 | AC108047.1 | 2  | antisense         | novel transcript                                                                             |
| 42 | ENSG00000142798 | 3360.26527 | 8759.74412 | -1.3822812 | 0.00095983 | HSPG2      | 1  | protein_coding    | heparan sulfate proteoglycan 2 [Source:HGNC Symbol;Acc:HGNC:10000]                           |
| 43 | ENSG00000230953 | 2.02720959 | 19.7414106 | -3.207279  | 0.00108459 | AC099677.1 | 1  | processed_pseud   | translational machinery associated 7 homolog (S. cerevisiae)                                 |
| 44 | ENSG00000255139 | 2.02720959 | 19.7414106 | -3.207279  | 0.00108459 | AP000442.2 | 11 | antisense         | novel transcript                                                                             |
| 45 | ENSG00000167548 | 1620.87016 | 4182.44656 | -1.3675118 | 0.00111441 | KMT2D      | 12 | protein_coding    | lysine methyltransferase 2D [Source:HGNC Symbol;Acc:HGNC:10000]                              |
| 46 | ENSG00000231226 | 6.07936364 | 31.58691   | -2.3539777 | 0.00115274 | TRIM31-AS1 | 6  | antisense         | TRIM31 antisense RNA 1 [Source:HGNC Symbol;Acc:HGNC:10000]                                   |
| 47 | ENSG00000257315 | 3.04024516 | 22.7027856 | -2.850983  | 0.0011736  | ZBED6      | 1  | protein_coding    | zinc finger BED-type containing 6 [Source:HGNC Symbol;Acc:HGNC:10000]                        |
| 48 | ENSG00000186364 | 24.3141307 | 79.9560261 | -1.712352  | 0.00124079 | NUDT17     | 1  | protein_coding    | nudix hydrolase 17 [Source:HGNC Symbol;Acc:HGNC:26618]                                       |
| 49 | ENSG00000252743 | 1.01417189 | 15.7929101 | -3.8061345 | 0.00136958 | RNU6-850P  | 6  | snRNA             | RNA, U6 small nuclear 850, pseudogene [Source:HGNC Symbol;Acc:HGNC:10000]                    |
| 50 | ENSG00000279841 | 1.01417189 | 15.7929101 | -3.8061345 | 0.00136958 | AC092135.3 | 16 | TEC               | novel transcript                                                                             |
| 51 | ENSG00000279652 | 1.01417189 | 15.7929101 | -3.8061345 | 0.00136958 | Z82217.1   | 22 | lincRNA           | novel transcript                                                                             |
| 52 | ENSG00000259366 | 11.1445735 | 45.406658  | -2.014613  | 0.00140429 | AC108449.2 | 8  | sense_intronic    | novel transcript, sense intronic to HMBOX1                                                   |
| 53 | ENSG00000280213 | 33.4315184 | 101.672771 | -1.6011037 | 0.00142274 | UCKL1-AS1  | 20 | antisense         | UCKL1 antisense RNA 1 [Source:HGNC Symbol;Acc:HGNC:31000]                                    |
| 54 | ENSG00000264349 | 1.39E-17   | 11.8444089 | -6.581531  | 0.00143701 | MIR4258    | 1  | miRNA             | microRNA 4258 [Source:HGNC Symbol;Acc:HGNC:38281]                                            |
| 55 | ENSG00000232713 | 1.39E-17   | 11.8444089 | -6.581531  | 0.00143701 | AC010733.1 | 2  | processed_pseud   | ribosomal protein S12 (RPS12) pseudogene                                                     |
| 56 | ENSG00000231760 | 1.39E-17   | 11.8444089 | -6.581531  | 0.00143701 | AL355312.2 | 6  | antisense         | novel transcript                                                                             |
| 57 | ENSG00000275097 | 1.39E-17   | 11.8444089 | -6.581531  | 0.00143701 | AC024940.5 | 12 | 3prime_overlap    | novel transcript, overlapping 3'UTR of FAM60A                                                |
| 58 | ENSG00000259209 | 1.39E-17   | 11.8444089 | -6.581531  | 0.00143701 | AC004943.1 | 16 | antisense         | novel transcript, antisense to ZFH3                                                          |
| 59 | ENSG00000158270 | 1.39E-17   | 11.8444089 | -6.581531  | 0.00143701 | COLEC12    | 18 | protein_coding    | collectin subfamily member 12 [Source:HGNC Symbol;Acc:HGNC:10000]                            |
| 60 | ENSG00000089847 | 1.39E-17   | 11.8444089 | -6.581531  | 0.00143701 | ANKRD24    | 19 | protein_coding    | ankyrin repeat domain 24 [Source:HGNC Symbol;Acc:HGNC:10000]                                 |
| 61 | ENSG00000254413 | 1.39E-17   | 11.8444089 | -6.581531  | 0.00143701 | CHKB-CPT1B | 22 | protein_coding    | CHKB-CPT1B readthrough (NMD candidate) [Source:HGNC Symbol;Acc:HGNC:10000]                   |
| 62 | ENSG00000234030 | 1.39E-17   | 11.8444089 | -6.581531  | 0.00143701 | TMEM97P1   | 21 | processed_pseud   | transmembrane protein 97 pseudogene 1 [Source:HGNC Symbol;Acc:HGNC:10000]                    |
| 63 | ENSG00000232630 | 4.05328324 | 24.6770356 | -2.5699259 | 0.0016487  | PRPS1P2    | 9  | processed_pseud   | phosphoribosyl pyrophosphate synthetase 1 pseudogene 2 [Source:HGNC Symbol;Acc:HGNC:10000]   |
| 64 | ENSG00000142512 | 3.04024516 | 21.7156606 | -2.7872117 | 0.00166513 | SIGLEC10   | 19 | protein_coding    | sialic acid binding Ig like lectin 10 [Source:HGNC Symbol;Acc:HGNC:10000]                    |
| 65 | ENSG00000235499 | 8.10544673 | 35.5354095 | -2.1155189 | 0.00172833 | AC073046.1 | 2  | lincRNA           | novel transcript (LOC100132318)                                                              |
| 66 | ENSG00000168016 | 12.157616  | 46.3937828 | -1.9213589 | 0.00195502 | TRANK1     | 3  | protein_coding    | tetratricopeptide repeat and ankyrin repeat containing 1 [Source:HGNC Symbol;Acc:HGNC:10000] |
| 67 | ENSG00000263968 | 6.07936364 | 29.6126602 | -2.2612473 | 0.00199893 | RN7SL381P  | 16 | misc_RNA          | RNA, 7SL, cytoplasmic 381, pseudogene [Source:HGNC Symbol;Acc:HGNC:10000]                    |
| 68 | ENSG00000257989 | 1.01417189 | 14.8057849 | -3.7137801 | 0.00213372 | AC078864.1 | 12 | lincRNA           | novel transcript                                                                             |
| 69 | ENSG00000233622 | 1.01417189 | 14.8057849 | -3.7137801 | 0.00213372 | CYP2T1P    | 19 | transcribed_unint | cytochrome P450 family 2 subfamily T member 1, pseudogene                                    |
| 70 | ENSG00000203761 | 57.7445535 | 158.926009 | -1.4586503 | 0.00217669 | MSTO2P     | 1  | unprocessed_pse   | misato family member 2, pseudogene [Source:HGNC Symbol;Acc:HGNC:10000]                       |
| 71 | ENSG00000273295 | 13.1706587 | 48.3680324 | -1.8669743 | 0.00218391 | AP000350.6 | 22 | lincRNA           | novel transcript                                                                             |
| 72 | ENSG00000230021 | 4.05328324 | 23.6899106 | -2.5113351 | 0.00227587 | AL669831.3 | 1  | transcribed_pro   | uncharacterized LOC101928626 [Source:NCBI gene;Acc:101928626]                                |
| 73 | ENSG00000224751 | 1.39E-17   | 10.8572834 | -6.457369  | 0.00243493 | SHMT1P1    | 1  | processed_pseud   | serine hydroxymethyltransferase 1 (soluble) pseudogene 1 [Source:HGNC Symbol;Acc:HGNC:10000] |
| 74 | ENSG00000251634 | 1.39E-17   | 10.8572834 | -6.457369  | 0.00243493 | AC145138.1 | 5  | unprocessed_pse   | NLR family, apoptosis inhibitory protein (NAIP) pseudogene                                   |
| 75 | ENSG00000201785 | 1.39E-17   | 10.8572834 | -6.457369  | 0.00243493 | SNORD117   | 6  | snoRNA            | small nucleolar RNA, C/D box 117 [Source:HGNC Symbol;Acc:HGNC:10000]                         |
| 76 | ENSG00000231519 | 1.39E-17   | 10.8572834 | -6.457369  | 0.00243493 | AC007285.2 | 7  | antisense         | novel transcript                                                                             |
| 77 | ENSG00000227329 | 1.39E-17   | 10.8572834 | -6.457369  | 0.00243493 | AL139396.1 | X  | processed_pseud   | pseudogene similar to part of suppressor of variegation 3-9                                  |
| 78 | ENSG00000255236 | 1.39E-17   | 10.8572834 | -6.457369  | 0.00243493 | AP002992.1 | 11 | antisense         | novel transcript                                                                             |
| 79 | ENSG00000149380 | 1.39E-17   | 10.8572834 | -6.457369  | 0.00243493 | P4HA3      | 11 | protein_coding    | prolyl 4-hydroxylase subunit alpha 3 [Source:HGNC Symbol;Acc:HGNC:10000]                     |
| 80 | ENSG00000185567 | 9.11848879 | 36.5225344 | -1.9874223 | 0.00255104 | AHNAK2     | 14 | protein_coding    | AHNAK nucleoprotein 2 [Source:HGNC Symbol;Acc:HGNC:20000]                                    |



|     |                 |            |            |            |            |             |    |                   |                                                                |
|-----|-----------------|------------|------------|------------|------------|-------------|----|-------------------|----------------------------------------------------------------|
| 81  | ENSG00000226450 | 11.1445735 | 41.4581586 | -1.8837456 | 0.00261795 | CYP2D8P     | 22 | unprocessed_pseud | cytochrome P450 family 2 subfamily D member 8, pseudoge        |
| 82  | ENSG00000237719 | 6.07936364 | 28.6255353 | -2.2125468 | 0.002639   | Z95152.1    | 6  | processed_pseud   | nudix (nucleoside diphosphate linked moiety X) type 5 motif    |
| 83  | ENSG00000260884 | 6.07936364 | 28.6255353 | -2.2125468 | 0.002639   | AC009120.3  | 16 | lincRNA           | novel transcript                                               |
| 84  | ENSG00000142178 | 67.874985  | 178.668504 | -1.39472   | 0.00279882 | SIK1        | 21 | protein_coding    | salt inducible kinase 1 [Source:HGNC Symbol;Acc:HGNC:111       |
| 85  | ENSG00000218226 | 103.331496 | 259.612735 | -1.3280527 | 0.00305522 | TATDN2P2    | 6  | processed_pseud   | TatD DNase domain containing 2 pseudogene 2 [Source:HG         |
| 86  | ENSG00000133069 | 4.05328324 | 22.7027856 | -2.4502637 | 0.00314942 | TMCC2       | 1  | protein_coding    | transmembrane and coiled-coil domain family 2 [Source:HG       |
| 87  | ENSG00000239704 | 4.05328324 | 22.7027856 | -2.4502637 | 0.00314942 | CDRT4       | 17 | protein_coding    | CMT1A duplicated region transcript 4 [Source:HGNC Symbol;      |
| 88  | ENSG00000227388 | 9.11848879 | 35.5354095 | -1.9480306 | 0.00321704 | AL133410.1  | 9  | lincRNA           | novel transcript                                               |
| 89  | ENSG00000106823 | 1.01417189 | 13.8186597 | -3.6151068 | 0.00334606 | ECM2        | 9  | protein_coding    | extracellular matrix protein 2 [Source:HGNC Symbol;Acc:HG      |
| 90  | ENSG00000167618 | 1.01417189 | 13.8186597 | -3.6151068 | 0.00334606 | LAIR2       | 19 | protein_coding    | leukocyte associated immunoglobulin like receptor 2 [Source    |
| 91  | ENSG00000261884 | 6.07936364 | 27.6384104 | -2.1621447 | 0.00348955 | AC040162.1  | 16 | protein_coding    | novel transcript                                               |
| 92  | ENSG00000187987 | 2.02720959 | 16.7800353 | -2.9744145 | 0.00351516 | ZSCAN23     | 6  | protein_coding    | zinc finger and SCAN domain containing 23 [Source:HGNC Sy      |
| 93  | ENSG00000235290 | 2.02720959 | 16.7800353 | -2.9744145 | 0.00351516 | HLA-W       | 6  | unprocessed_pse   | major histocompatibility complex, class I, W (pseudogene) [    |
| 94  | ENSG00000092200 | 2.02720959 | 16.7800353 | -2.9744145 | 0.00351516 | RPGRIP1     | 14 | protein_coding    | RPGR interacting protein 1 [Source:HGNC Symbol;Acc:HGNC:       |
| 95  | ENSG00000276317 | 2.02720959 | 16.7800353 | -2.9744145 | 0.00351516 | AL357033.3  | 20 | antisense         | novel transcript, antisense to SLCO4A1                         |
| 96  | ENSG00000236761 | 1.39E-17   | 9.87015775 | -6.3215063 | 0.00417417 | CTAGE9      | 6  | protein_coding    | CTAGE family member 9 [Source:HGNC Symbol;Acc:HGNC:37          |
| 97  | ENSG00000237243 | 1.39E-17   | 9.87015775 | -6.3215063 | 0.00417417 | AC022173.1  | 7  | lincRNA           | uncharacterized LOC100130880 [Source:NCBI gene;Acc:1001        |
| 98  | ENSG00000186471 | 1.39E-17   | 9.87015775 | -6.3215063 | 0.00417417 | AKAP14      | X  | protein_coding    | A-kinase anchoring protein 14 [Source:HGNC Symbol;Acc:HG       |
| 99  | ENSG00000235961 | 1.39E-17   | 9.87015775 | -6.3215063 | 0.00417417 | PNMA6A      | X  | protein_coding    | PNMA family member 6A [Source:HGNC Symbol;Acc:HGNC:2           |
| 100 | ENSG00000253586 | 1.39E-17   | 9.87015775 | -6.3215063 | 0.00417417 | AC067817.1  | 8  | sense_intronic    | novel transcript                                               |
| 101 | ENSG00000259121 | 1.39E-17   | 9.87015775 | -6.3215063 | 0.00417417 | AL109628.1  | 14 | processed_pseud   | ribosomal protein, large, P1 (RPLP1) pseudogene                |
| 102 | ENSG00000253674 | 1.39E-17   | 9.87015775 | -6.3215063 | 0.00417417 | IGHV11-78-1 | 14 | IG_V_pseudogen    | immunoglobulin heavy variable (II)-78-1 (pseudogene) [Sourc    |
| 103 | ENSG00000264937 | 1.39E-17   | 9.87015775 | -6.3215063 | 0.00417417 | AC100830.2  | 15 | antisense         | novel transcript, antisense to ornithine decarboxylase antizyr |
| 104 | ENSG00000260874 | 1.39E-17   | 9.87015775 | -6.3215063 | 0.00417417 | AC106820.5  | 16 | lincRNA           | uncharacterized LOC105371050 [Source:NCBI gene;Acc:1053        |
| 105 | ENSG00000266076 | 1.39E-17   | 9.87015775 | -6.3215063 | 0.00417417 | AC004805.1  | 17 | protein_coding    | novel transcript                                               |
| 106 | ENSG00000270993 | 1.39E-17   | 9.87015775 | -6.3215063 | 0.00417417 | AC111186.1  | 17 | processed_pseud   | WD repeat domain, phosphoinositide interacting 2 (WIPI2) p     |
| 107 | ENSG00000267908 | 1.39E-17   | 9.87015775 | -6.3215063 | 0.00417417 | ZSCAN5DP    | 19 | unprocessed_pse   | zinc finger and SCAN domain containing 5D pseudogene [Sou      |
| 108 | ENSG00000273343 | 4.05328324 | 21.7156606 | -2.3864924 | 0.00436855 | AC007663.4  | 22 | sense_intronic    | novel transcript, sense intronic to DGCR6L                     |
| 109 | ENSG00000155657 | 56.7315104 | 146.093386 | -1.3627658 | 0.00441944 | TTN         | 2  | protein_coding    | titin [Source:HGNC Symbol;Acc:HGNC:12403]                      |
| 110 | ENSG00000167244 | 3189.06098 | 7231.67497 | -1.1811673 | 0.0045965  | IGF2        | 11 | protein_coding    | insulin like growth factor 2 [Source:HGNC Symbol;Acc:HGNC:!    |
| 111 | ENSG00000283689 | 8.10544673 | 31.58691   | -1.9462258 | 0.00461337 | AC018553.2  | 16 | antisense         | novel transcript, antisense to IRLX3                           |
| 112 | ENSG00000065675 | 3.04024516 | 18.7542855 | -2.5770105 | 0.00484911 | PRKCQ       | 10 | protein_coding    | protein kinase C theta [Source:HGNC Symbol;Acc:HGNC:9410       |
| 113 | ENSG00000263096 | 43.5619495 | 114.505394 | -1.3917652 | 0.00490444 | AC007638.2  | 17 | antisense         | novel transcript, antisense to HLF                             |
| 114 | ENSG00000224186 | 30.3923891 | 82.9174005 | -1.4442874 | 0.00497182 | C5orf66     | 5  | antisense         | chromosome 5 open reading frame 66 [Source:HGNC Symbol;        |
| 115 | ENSG00000197301 | 17.2228299 | 53.3036565 | -1.6229795 | 0.00503207 | AC090673.1  | 12 | antisense         | uncharacterized LOC100129940 [Source:NCBI gene;Acc:1001        |
| 116 | ENSG00000230424 | 2.02720959 | 15.7929101 | -2.8876181 | 0.00524731 | AL035413.1  | 1  | antisense         | uncharacterized LOC101927895 [Source:NCBI gene;Acc:1019        |
| 117 | ENSG00000262180 | 2.02720959 | 15.7929101 | -2.8876181 | 0.00524731 | OCLM        | 1  | protein_coding    | oculomedin [Source:HGNC Symbol;Acc:HGNC:8103]                  |
| 118 | ENSG00000183943 | 2.02720959 | 15.7929101 | -2.8876181 | 0.00524731 | PRKX        | X  | protein_coding    | protein kinase X-linked [Source:HGNC Symbol;Acc:HGNC:944:      |
| 119 | ENSG00000266777 | 2.02720959 | 15.7929101 | -2.8876181 | 0.00524731 | SH3GL1P1    | 17 | transcribed_proc  | SH3 domain containing GRB2 like 1, endophilin A2 pseudoge      |
| 120 | ENSG00000231119 | 2.02720959 | 15.7929101 | -2.8876181 | 0.00524731 | AL031666.1  | 20 | antisense         | uncharacterized LOC101927377 [Source:NCBI gene;Acc:1019        |

|     |                 |            |            |            |            |             |    |                  |                                                               |
|-----|-----------------|------------|------------|------------|------------|-------------|----|------------------|---------------------------------------------------------------|
| 121 | ENSG00000231467 | 2.02720959 | 15.7929101 | -2.8876181 | 0.00524731 | AL022314.1  | 22 | antisense        | novel transcript                                              |
| 122 | ENSG00000137261 | 1.01417189 | 12.8315343 | -3.5091859 | 0.00528154 | KIAA0319    | 6  | protein_coding   | KIAA0319 [Source:HGNC Symbol;Acc:HGNC:21580]                  |
| 123 | ENSG00000228327 | 55.7184672 | 141.157763 | -1.3391645 | 0.00532101 | AL669831.1  | 1  | transcribed_unpr | general transcription factor Ili (GTF2I) pseudogene           |
| 124 | ENSG00000159917 | 15.1967442 | 48.3680324 | -1.662333  | 0.00533667 | ZNF235      | 19 | protein_coding   | zinc finger protein 235 [Source:HGNC Symbol;Acc:HGNC:128      |
| 125 | ENSG00000084674 | 65284.5549 | 144767.769 | -1.1489253 | 0.00568134 | APOB        | 2  | protein_coding   | apolipoprotein B [Source:HGNC Symbol;Acc:HGNC:603]            |
| 126 | ENSG00000272556 | 95.2271502 | 226.050493 | -1.2461287 | 0.00589811 | GTF2IP13    | 7  | transcribed_unpr | general transcription factor Ili pseudogene 13 [Source:HGNC   |
| 127 | ENSG00000110025 | 11.1445735 | 37.5096592 | -1.7398121 | 0.00606867 | SNX15       | 11 | protein_coding   | sorting nexin 15 [Source:HGNC Symbol;Acc:HGNC:14978]          |
| 128 | ENSG00000235408 | 6.07936364 | 25.6641605 | -2.055729  | 0.00612771 | SNORA71B    | 20 | snoRNA           | small nucleolar RNA, H/ACA box 71B [Source:HGNC Symbol;       |
| 129 | ENSG00000232034 | 9.11848879 | 32.5740349 | -1.8229594 | 0.00648527 | AC092168.2  | 2  | sense_intronic   | novel transcript                                              |
| 130 | ENSG00000279662 | 30.3923891 | 79.9560261 | -1.3919004 | 0.00694615 | AC131649.2  | 16 | TEC              | TEC                                                           |
| 131 | ENSG00000229178 | 3.04024516 | 17.7671604 | -2.4995385 | 0.00696616 | AC233280.1  | 3  | lincRNA          | novel transcript                                              |
| 132 | ENSG00000182175 | 3.04024516 | 17.7671604 | -2.4995385 | 0.00696616 | RGMA        | 15 | protein_coding   | repulsive guidance molecule BMP co-receptor a [Source:HGI     |
| 133 | ENSG00000226763 | 3.04024516 | 17.7671604 | -2.4995385 | 0.00696616 | SRRM5       | 19 | protein_coding   | serine/arginine repetitive matrix 5 [Source:HGNC Symbol;Acc   |
| 134 | ENSG00000236364 | 5.06632294 | 22.7027856 | -2.1369952 | 0.00716778 | AL358115.1  | 1  | antisense        | novel transcript, antisense to UCK2                           |
| 135 | ENSG00000207805 | 5.06632294 | 22.7027856 | -2.1369952 | 0.00716778 | MIR483      | 11 | miRNA            | microRNA 483 [Source:HGNC Symbol;Acc:HGNC:32340]              |
| 136 | ENSG00000215493 | 5.06632294 | 22.7027856 | -2.1369952 | 0.00716778 | AC007731.2  | 22 | processed_pseud  | kelch-like 12 (Drosophila) (KLH12) pseudogene                 |
| 137 | ENSG00000235831 | 1.39E-17   | 8.88303193 | -6.1715061 | 0.00724341 | BHLHE40-AS1 | 3  | antisense        | BHLHE40 antisense RNA 1 [Source:HGNC Symbol;Acc:HGNC:         |
| 138 | ENSG00000253119 | 1.39E-17   | 8.88303193 | -6.1715061 | 0.00724341 | HNRNPA3P7   | 5  | processed_pseud  | heterogeneous nuclear ribonucleoprotein A3 pseudogene 7       |
| 139 | ENSG00000237065 | 1.39E-17   | 8.88303193 | -6.1715061 | 0.00724341 | NANOGP4     | 7  | transcribed_pro  | Nanog homeobox pseudogene 4 [Source:HGNC Symbol;Acc:f         |
| 140 | ENSG00000123965 | 1.39E-17   | 8.88303193 | -6.1715061 | 0.00724341 | PMS2P5      | 7  | unprocessed_pse  | PMS1 homolog 2, mismatch repair system component pseud        |
| 141 | ENSG00000243566 | 1.39E-17   | 8.88303193 | -6.1715061 | 0.00724341 | UPK3B       | 7  | protein_coding   | uroplakin 3B [Source:HGNC Symbol;Acc:HGNC:21444]              |
| 142 | ENSG00000208036 | 1.39E-17   | 8.88303193 | -6.1715061 | 0.00724341 | MIR106B     | 7  | miRNA            | microRNA 106b [Source:HGNC Symbol;Acc:HGNC:31495]             |
| 143 | ENSG00000282977 | 1.39E-17   | 8.88303193 | -6.1715061 | 0.00724341 | PCBP2-OT1   | 12 | non_coding       | PCBP2 overlapping transcript 1 [Source:HGNC Symbol;Acc:H      |
| 144 | ENSG00000236526 | 1.39E-17   | 8.88303193 | -6.1715061 | 0.00724341 | AL035448.1  | 20 | antisense        | novel transcript                                              |
| 145 | ENSG00000093100 | 1.39E-17   | 8.88303193 | -6.1715061 | 0.00724341 | AC016026.1  | 22 | processed_transc | novel transcript                                              |
| 146 | ENSG00000005810 | 286.692308 | 635.707272 | -1.1485221 | 0.00740589 | MYCBP2      | 13 | protein_coding   | MYC binding protein 2, E3 ubiquitin protein ligase [Source:H  |
| 147 | ENSG00000038219 | 305.940128 | 677.166513 | -1.1459457 | 0.00741305 | BOD1L1      | 4  | protein_coding   | biorientation of chromosomes in cell division 1 like 1 [Sourc |
| 148 | ENSG00000116127 | 185.387992 | 414.591324 | -1.1606169 | 0.00749452 | ALMS1       | 2  | protein_coding   | ALMS1, centrosome and basal body associated protein [Sou      |
| 149 | ENSG00000223901 | 19.2489157 | 55.2779062 | -1.5159563 | 0.00753465 | AP001469.1  | 21 | antisense        | novel transcript                                              |
| 150 | ENSG00000247853 | 2.02720959 | 14.8057849 | -2.7952637 | 0.00786477 | AC006064.2  | 12 | antisense        | novel transcript, antisense to CHD4                           |
| 151 | ENSG00000257896 | 2.02720959 | 14.8057849 | -2.7952637 | 0.00786477 | AC093012.1  | 12 | transcribed_unpr | La ribonucleoprotein domain family, member 7 (LARP7)          |
| 152 | ENSG00000159337 | 2.02720959 | 14.8057849 | -2.7952637 | 0.00786477 | PLA2G4D     | 15 | protein_coding   | phospholipase A2 group IVD [Source:HGNC Symbol;Acc:HGNC       |
| 153 | ENSG00000232645 | 2.02720959 | 14.8057849 | -2.7952637 | 0.00786477 | LINC01431   | 20 | lincRNA          | long intergenic non-protein coding RNA 1431 [Source:HGNC      |
| 154 | ENSG00000276570 | 12.157616  | 38.4967841 | -1.6529672 | 0.00794554 | AC010327.5  | 19 | processed_transc | novel transcript                                              |
| 155 | ENSG00000030419 | 6.07936364 | 24.6770356 | -1.9994251 | 0.00813533 | IKZF2       | 2  | protein_coding   | IKAROS family zinc finger 2 [Source:HGNC Symbol;Acc:HGNC      |
| 156 | ENSG00000279641 | 6.07936364 | 24.6770356 | -1.9994251 | 0.00813533 | AC120057.3  | 17 | TEC              | TEC                                                           |
| 157 | ENSG00000204778 | 13.1706587 | 40.4710338 | -1.6105418 | 0.00835646 | CBWD4P      | 9  | unprocessed_pse  | COBW domain containing 4 pseudogene [Source:HGNC Sym          |
| 158 | ENSG00000263069 | 13.1706587 | 40.4710338 | -1.6105418 | 0.00835646 | AC124319.2  | 17 | antisense        | uncharacterized LOC100294362 [Source:NCBI gene;Acc:100        |
| 159 | ENSG00000146216 | 28.3663029 | 74.0332774 | -1.3801629 | 0.0083568  | TTBK1       | 6  | protein_coding   | tau tubulin kinase 1 [Source:HGNC Symbol;Acc:HGNC:19140       |
| 160 | ENSG00000248641 | 1.01417189 | 11.8444089 | -3.3948679 | 0.00839028 | HMGA1P2     | 4  | processed_pseud  | high mobility group AT-hook 1 pseudogene 2 [Source:HGNC       |



|     |                 |            |            |            |            |            |    |                  |                                                             |
|-----|-----------------|------------|------------|------------|------------|------------|----|------------------|-------------------------------------------------------------|
| 161 | ENSG00000249655 | 1.01417189 | 11.8444089 | -3.3948679 | 0.00839028 | AC008434.1 | 5  | antisense        | novel transcript                                            |
| 162 | ENSG00000251728 | 1.01417189 | 11.8444089 | -3.3948679 | 0.00839028 | RF00019    | 7  | misc_RNA         |                                                             |
| 163 | ENSG00000107249 | 1.01417189 | 11.8444089 | -3.3948679 | 0.00839028 | GLIS3      | 9  | protein_coding   | GLIS family zinc finger 3 [Source:HGNC Symbol;Acc:HGNC:28]  |
| 164 | ENSG00000160408 | 1.01417189 | 11.8444089 | -3.3948679 | 0.00839028 | ST6GALNAC6 | 9  | protein_coding   | ST6 N-acetylgalactosaminide alpha-2,6-sialyltransferase 6 [ |
| 165 | ENSG00000260394 | 1.01417189 | 11.8444089 | -3.3948679 | 0.00839028 | Z92544.1   | 16 | antisense        | uncharacterized LOC105371184 [Source:NCBI gene;Acc:105      |
| 166 | ENSG00000278986 | 1.01417189 | 11.8444089 | -3.3948679 | 0.00839028 | AC091060.1 | 18 | TEC              | TEC                                                         |
| 167 | ENSG00000269172 | 1.01417189 | 11.8444089 | -3.3948679 | 0.00839028 | AC011443.1 | 19 | antisense        | novel transcript, antisense to PAK4                         |
| 168 | ENSG00000133454 | 1.01417189 | 11.8444089 | -3.3948679 | 0.00839028 | MYO18B     | 22 | protein_coding   | myosin XVIIIIB [Source:HGNC Symbol;Acc:HGNC:18150]          |
| 169 | ENSG00000176542 | 208.687984 | 460.986188 | -1.1429142 | 0.00847823 | USF3       | 3  | protein_coding   | upstream transcription factor family member 3 [Source:HGN   |
| 170 | ENSG00000179899 | 24.3141307 | 65.1491542 | -1.4174078 | 0.00867488 | PHC1P1     | 12 | processed_pseud  | polyhomeotic homolog 1 pseudogene 1 [Source:HGNC Symb       |
| 171 | ENSG00000066056 | 25.3271738 | 67.1234038 | -1.4017967 | 0.00886945 | TIE1       | 1  | protein_coding   | tyrosine kinase with immunoglobulin like and EGF like doma  |
| 172 | ENSG00000156804 | 7.09240497 | 26.6512854 | -1.8916841 | 0.00898543 | FBXO32     | 8  | protein_coding   | F-box protein 32 [Source:HGNC Symbol;Acc:HGNC:16731]        |
| 173 | ENSG00000183458 | 405.218359 | 871.630092 | -1.1047841 | 0.00916938 | AC138932.1 | 16 | transcribed_unpr | polycystic kidney disease 1 (autosomal dominant) (PKD1) ps  |
| 174 | ENSG00000231073 | 8.10544673 | 28.6255353 | -1.8047949 | 0.00973082 | AL590133.1 | 1  | antisense        | novel transcript, antisense to CERS2                        |
| 175 | ENSG00000227934 | 5.06632294 | 21.7156606 | -2.0732239 | 0.00973269 | AL732414.1 | 1  | processed_pseud  | ring finger protein 4 (RNF4) pseudogene                     |
| 176 | ENSG00000224975 | 5.06632294 | 21.7156606 | -2.0732239 | 0.00973269 | INE1       | X  | sense_intronic   | inactivation escape 1 [Source:HGNC Symbol;Acc:HGNC:6060     |
| 177 | ENSG00000167889 | 5.06632294 | 21.7156606 | -2.0732239 | 0.00973269 | MGAT5B     | 17 | protein_coding   | alpha-1,6-mannosylglycoprotein 6-beta-N-acetylglucosamin    |
| 178 | ENSG00000148773 | 1678.61362 | 3541.80259 | -1.0771585 | 0.00978725 | MKI67      | 10 | protein_coding   | marker of proliferation Ki-67 [Source:HGNC Symbol;Acc:HGNC  |
| 179 | ENSG00000197714 | 85.0967186 | 192.488251 | -1.1764406 | 0.00993505 | ZNF460     | 19 | protein_coding   | zinc finger protein 460 [Source:HGNC Symbol;Acc:HGNC:216    |
| 180 | ENSG00000230732 | 3.04024516 | 16.7800353 | -2.417669  | 0.01003372 | AC016949.1 | 3  | sense_intronic   | novel transcript                                            |
| 181 | ENSG00000128918 | 3.04024516 | 16.7800353 | -2.417669  | 0.01003372 | ALDH1A2    | 15 | protein_coding   | aldehyde dehydrogenase 1 family member A2 [Source:H         |
| 182 | ENSG00000272115 | 13.1706587 | 39.4839089 | -1.575029  | 0.01013842 | AC233992.3 | 8  | antisense        | novel transcript, antisense to SLC39A4                      |
| 183 | ENSG00000271550 | 6.07936364 | 23.6899106 | -1.9408343 | 0.01081171 | BNIP3P11   | 7  | processed_pseud  | BCL2 interacting protein 3 pseudogene 11 [Source:HGN        |
| 184 | ENSG00000054654 | 144.866265 | 314.891722 | -1.1194783 | 0.01123117 | SYNE2      | 14 | protein_coding   | spectrin repeat containing nuclear envelope protein 2 [     |
| 185 | ENSG00000103647 | 24.3141307 | 63.1749046 | -1.3731    | 0.0112742  | CORO2B     | 15 | protein_coding   | coronin 2B [Source:HGNC Symbol;Acc:HGNC:2256]               |
| 186 | ENSG00000163884 | 67.874985  | 154.977509 | -1.189649  | 0.01129721 | KLF15      | 3  | protein_coding   | Kruppel like factor 15 [Source:HGNC Symbol;Acc:HGNC:        |
| 187 | ENSG00000053438 | 18.2358728 | 50.3422821 | -1.4588313 | 0.01169695 | NNAT       | 20 | protein_coding   | neuronatin [Source:HGNC Symbol;Acc:HGNC:7860]               |
| 188 | ENSG00000272655 | 7.09240497 | 25.6641605 | -1.8374953 | 0.01172386 | POLR2J4    | 7  | transcribed_unpr | RNA polymerase II subunit J4, pseudogene [Source:HGN        |
| 189 | ENSG00000262209 | 4.05328324 | 18.7542855 | -2.1762912 | 0.01180303 | PCDHGB3    | 5  | protein_coding   | protocadherin gamma subfamily B, 3 [Source:HGNC Syn         |
| 190 | ENSG00000277978 | 4.05328324 | 18.7542855 | -2.1762912 | 0.01180303 | AC010542.5 | 16 | antisense        | novel transcript, antisense to CKLF                         |
| 191 | ENSG00000269069 | 4.05328324 | 18.7542855 | -2.1762912 | 0.01180303 | AC007842.1 | 19 | processed_pseud  | protein associated with topoisomerase II homolog 1 (ye      |
| 192 | ENSG00000142583 | 2.02720959 | 13.8186597 | -2.6965904 | 0.01183243 | SLC2A5     | 1  | protein_coding   | solute carrier family 2 member 5 [Source:HGNC Symbol;       |
| 193 | ENSG00000251611 | 2.02720959 | 13.8186597 | -2.6965904 | 0.01183243 | FAM160A1-D | 4  | lincRNA          | FAM160A1 divergent transcript [Source:HGNC Symbol;A         |
| 194 | ENSG00000260417 | 2.02720959 | 13.8186597 | -2.6965904 | 0.01183243 | AC092127.1 | 16 | lincRNA          | novel transcript                                            |
| 195 | ENSG00000279345 | 2.02720959 | 13.8186597 | -2.6965904 | 0.01183243 | Z98885.3   | 22 | antisense        | novel transcript, antisense to BRD1                         |
| 196 | ENSG00000158292 | 20.2619587 | 54.2907814 | -1.4164852 | 0.0121478  | GPR153     | 1  | protein_coding   | G protein-coupled receptor 153 [Source:HGNC Symbol;A        |
| 197 | ENSG00000244932 | 20.2619587 | 54.2907814 | -1.4164852 | 0.0121478  | AL449212.1 | 3  | unprocessed_pse  | pseudogene similar to intraflagellar transport 122 hom      |
| 198 | ENSG00000179583 | 20.2619587 | 54.2907814 | -1.4164852 | 0.0121478  | CIITA      | 16 | protein_coding   | class II major histocompatibility complex transactivator    |
| 199 | ENSG00000176222 | 8.10544673 | 27.6384104 | -1.7543928 | 0.0124954  | ZNF404     | 19 | protein_coding   | zinc finger protein 404 [Source:HGNC Symbol;Acc:HGNC        |
| 200 | ENSG00000198483 | 1.39E-17   | 7.89590589 | -6.0040809 | 0.01273085 | ANKRD35    | 1  | protein_coding   | ankyrin repeat domain 35 [Source:HGNC Symbol;Acc:HC         |

|     |                 |            |            |            |            |            |    |                  |                                                      |
|-----|-----------------|------------|------------|------------|------------|------------|----|------------------|------------------------------------------------------|
| 201 | ENSG00000272750 | 1.39E-17   | 7.89590589 | -6.0040809 | 0.01273085 | AL592148.3 | 1  | antisense        | novel transcript, antisense to MIA3                  |
| 202 | ENSG00000172985 | 1.39E-17   | 7.89590589 | -6.0040809 | 0.01273085 | SH3RF3     | 2  | protein_coding   | SH3 domain containing ring finger 3 [Source:HGNC S   |
| 203 | ENSG00000199121 | 1.39E-17   | 7.89590589 | -6.0040809 | 0.01273085 | MIR26B     | 2  | miRNA            | microRNA 26b [Source:HGNC Symbol;Acc:HGNC:316        |
| 204 | ENSG00000078081 | 1.39E-17   | 7.89590589 | -6.0040809 | 0.01273085 | LAMP3      | 3  | protein_coding   | lysosomal associated membrane protein 3 [Source:H    |
| 205 | ENSG00000205940 | 1.39E-17   | 7.89590589 | -6.0040809 | 0.01273085 | HSP90AB2P  | 4  | transcribed_pro  | heat shock protein 90 alpha family class B member    |
| 206 | ENSG00000251526 | 1.39E-17   | 7.89590589 | -6.0040809 | 0.01273085 | LINC02435  | 4  | lincRNA          | long intergenic non-protein coding RNA 2435 [Sourc   |
| 207 | ENSG00000274721 | 1.39E-17   | 7.89590589 | -6.0040809 | 0.01273085 | RF02039    | 5  | misc_RNA         |                                                      |
| 208 | ENSG00000229390 | 1.39E-17   | 7.89590589 | -6.0040809 | 0.01273085 | MICD       | 6  | unprocessed_pse  | MHC class I polypeptide-related sequence D (pseud    |
| 209 | ENSG00000229452 | 1.39E-17   | 7.89590589 | -6.0040809 | 0.01273085 | AC005162.1 | 7  | antisense        | uncharacterized LOC107986703 [Source:NCBI gene;      |
| 210 | ENSG00000235379 | 1.39E-17   | 7.89590589 | -6.0040809 | 0.01273085 | RPL7P31    | 7  | processed_pseud  | ribosomal protein L7 pseudogene 31 [Source:HGNC      |
| 211 | ENSG00000259294 | 1.39E-17   | 7.89590589 | -6.0040809 | 0.01273085 | AC005096.1 | 7  | antisense        | novel transcript, antisense to CUX1                  |
| 212 | ENSG00000206685 | 1.39E-17   | 7.89590589 | -6.0040809 | 0.01273085 | RNU6-1189P | X  | snRNA            | RNA, U6 small nuclear 1189, pseudogene [Source:Hi    |
| 213 | ENSG00000254274 | 1.39E-17   | 7.89590589 | -6.0040809 | 0.01273085 | TDGF1P5    | 8  | processed_pseud  | teratocarcinoma-derived growth factor 1 pseudogen    |
| 214 | ENSG00000236745 | 1.39E-17   | 7.89590589 | -6.0040809 | 0.01273085 | YRDCP2     | 9  | processed_pseud  | yrnC N(6)-threonylcarbamoyltransferase domain cor    |
| 215 | ENSG00000171671 | 1.39E-17   | 7.89590589 | -6.0040809 | 0.01273085 | SHANK2-AS3 | 11 | antisense        | SHANK2 antisense RNA 3 [Source:HGNC Symbol;Acc       |
| 216 | ENSG00000213731 | 1.39E-17   | 7.89590589 | -6.0040809 | 0.01273085 | RAB5CP1    | 10 | processed_pseud  | RAB5C, member RAS oncogene family pseudogene 1       |
| 217 | ENSG00000237280 | 1.39E-17   | 7.89590589 | -6.0040809 | 0.01273085 | AL136982.3 | 10 | sense_intronic   | novel transcript                                     |
| 218 | ENSG00000277342 | 1.39E-17   | 7.89590589 | -6.0040809 | 0.01273085 | AC048344.4 | 12 | sense_intronic   | novel transcript, sense intronic to BICD1            |
| 219 | ENSG00000251893 | 1.39E-17   | 7.89590589 | -6.0040809 | 0.01273085 | RF00156    | 12 | snoRNA           |                                                      |
| 220 | ENSG00000275880 | 1.39E-17   | 7.89590589 | -6.0040809 | 0.01273085 | AL139385.1 | 13 | antisense        | novel transcript, antisense to CARKD                 |
| 221 | ENSG00000275910 | 1.39E-17   | 7.89590589 | -6.0040809 | 0.01273085 | AC138932.5 | 16 | antisense        | novel transcript, antisense to PDXDC1                |
| 222 | ENSG00000155714 | 1.39E-17   | 7.89590589 | -6.0040809 | 0.01273085 | PDZD9      | 16 | protein_coding   | PDZ domain containing 9 [Source:HGNC Symbol;Acc:H    |
| 223 | ENSG00000277954 | 1.39E-17   | 7.89590589 | -6.0040809 | 0.01273085 | AC092376.2 | 16 | antisense        | novel transcript, antisense to WWOX                  |
| 224 | ENSG00000272636 | 1.39E-17   | 7.89590589 | -6.0040809 | 0.01273085 | DOC2B      | 17 | protein_coding   | double C2 domain beta [Source:HGNC Symbol;Acc:HGI    |
| 225 | ENSG00000089558 | 1.39E-17   | 7.89590589 | -6.0040809 | 0.01273085 | KCNH4      | 17 | protein_coding   | potassium voltage-gated channel subfamily H membe    |
| 226 | ENSG00000267432 | 1.39E-17   | 7.89590589 | -6.0040809 | 0.01273085 | DNAH17-AS1 | 17 | processed_transc | DNAH17 antisense RNA 1 [Source:HGNC Symbol;Acc:H     |
| 227 | ENSG00000267251 | 1.39E-17   | 7.89590589 | -6.0040809 | 0.01273085 | AC139100.1 | 18 | antisense        | novel transcript, antisense to PARD6G                |
| 228 | ENSG00000228812 | 1.39E-17   | 7.89590589 | -6.0040809 | 0.01273085 | LAMA5-AS1  | 20 | antisense        | LAMA5 antisense RNA 1 [Source:HGNC Symbol;Acc:HG     |
| 229 | ENSG00000279203 | 1.39E-17   | 7.89590589 | -6.0040809 | 0.01273085 | AC005785.2 | 19 | TEC              | TEC                                                  |
| 230 | ENSG00000274080 | 37.4836908 | 90.8143988 | -1.2738987 | 0.01292629 | AC005089.1 | 7  | sense_intronic   | novel transcript                                     |
| 231 | ENSG00000243716 | 832.722574 | 1711.67327 | -1.0393911 | 0.01317934 | NPIPB5     | 16 | protein_coding   | nuclear pore complex interacting protein family memb |
| 232 | ENSG00000162975 | 5.06632294 | 20.7285356 | -2.0065028 | 0.01323105 | KCNF1      | 2  | protein_coding   | potassium voltage-gated channel modifier subfamily f |
| 233 | ENSG00000224775 | 5.06632294 | 20.7285356 | -2.0065028 | 0.01323105 | BRAF1      | X  | unprocessed_pse  | BRAF pseudogene 1 [Source:HGNC Symbol;Acc:HGNC:      |
| 234 | ENSG00000255968 | 5.06632294 | 20.7285356 | -2.0065028 | 0.01323105 | AC024145.1 | 12 | antisense        | novel transcript to ITPR2                            |
| 235 | ENSG00000258317 | 5.06632294 | 20.7285356 | -2.0065028 | 0.01323105 | AC034102.6 | 12 | antisense        | novel transcript, antisense to ZC3H10 and ESYT1      |
| 236 | ENSG00000242950 | 1.01417189 | 10.8572834 | -3.2707058 | 0.01341209 | ERVW-1     | 7  | protein_coding   | endogenous retrovirus group W member 1, envelope [   |
| 237 | ENSG00000172476 | 1.01417189 | 10.8572834 | -3.2707058 | 0.01341209 | RAB40A     | X  | protein_coding   | RAB40A, member RAS oncogene family [Source:HGNC      |
| 238 | ENSG00000254207 | 1.01417189 | 10.8572834 | -3.2707058 | 0.01341209 | AC100797.1 | 8  | sense_intronic   | novel transcript                                     |
| 239 | ENSG00000230724 | 1.01417189 | 10.8572834 | -3.2707058 | 0.01341209 | LINC01001  | 11 | lincRNA          | long intergenic non-protein coding RNA 1001 [Source: |
| 240 | ENSG00000229990 | 1.01417189 | 10.8572834 | -3.2707058 | 0.01341209 | AC022400.2 | 10 | antisense        | novel transcript, antisense to CAMK2G                |



|     |                 |            |            |            |            |            |    |                  |                                                           |
|-----|-----------------|------------|------------|------------|------------|------------|----|------------------|-----------------------------------------------------------|
| 241 | ENSG00000269938 | 1.01417189 | 10.8572834 | -3.2707058 | 0.01341209 | AC068790.2 | 12 | sense_intronic   | novel transcript, sense intronic to CCDC92                |
| 242 | ENSG00000258648 | 1.01417189 | 10.8572834 | -3.2707058 | 0.01341209 | UBE2CP1    | 14 | processed_pseud  | ubiquitin conjugating enzyme E2 C pseudogene 1 [Source    |
| 243 | ENSG00000232043 | 1.01417189 | 10.8572834 | -3.2707058 | 0.01341209 | AL133230.1 | 20 | antisense        | novel transcript, antisense to PTPN1                      |
| 244 | ENSG00000167642 | 1.01417189 | 10.8572834 | -3.2707058 | 0.01341209 | SPINT2     | 19 | protein_coding   | serine peptidase inhibitor, Kunitz type 2 [Source:HGNC S  |
| 245 | ENSG00000064300 | 127.644531 | 274.419607 | -1.1035148 | 0.01359801 | NGFR       | 17 | protein_coding   | nerve growth factor receptor [Source:HGNC Symbol;Acc:     |
| 246 | ENSG00000254681 | 721.287826 | 1471.80195 | -1.0288123 | 0.01420726 | PKD1P5     | 16 | transcribed_unpr | polycystin 1, transient receptor potential channel intera |
| 247 | ENSG00000113205 | 3.04024516 | 15.7929101 | -2.3308727 | 0.01448543 | PCDHB3     | 5  | protein_coding   | protocadherin beta 3 [Source:HGNC Symbol;Acc:HGNC:8       |
| 248 | ENSG00000269318 | 3.04024516 | 15.7929101 | -2.3308727 | 0.01448543 | AC007292.2 | 19 | antisense        | novel transcript, antisense to MPND                       |
| 249 | ENSG00000103657 | 265.418402 | 546.866043 | -1.0425783 | 0.01491673 | HERC1      | 15 | protein_coding   | HECT and RLD domain containing E3 ubiquitin protein li    |
| 250 | ENSG00000170379 | 13.1706587 | 37.5096592 | -1.501268  | 0.01493103 | TCAF2      | 7  | protein_coding   | TRPM8 channel associated factor 2 [Source:HGNC Symb       |
| 251 | ENSG00000080603 | 160.061913 | 334.634218 | -1.063382  | 0.01518967 | SRCAP      | 16 | protein_coding   | Snf2 related CREBBP activator protein [Source:HGNC Sym    |
| 252 | ENSG00000205129 | 7.09240497 | 24.6770356 | -1.7811914 | 0.01530539 | C4orf47    | 4  | protein_coding   | chromosome 4 open reading frame 47 [Source:HGNC Sym       |
| 253 | ENSG00000204710 | 7.09240497 | 24.6770356 | -1.7811914 | 0.01530539 | SPDYC      | 11 | protein_coding   | speedy/RINGO cell cycle regulator family member C [So     |
| 254 | ENSG00000128011 | 7.09240497 | 24.6770356 | -1.7811914 | 0.01530539 | LRFN1      | 19 | protein_coding   | leucine rich repeat and fibronectin type III domain conta |
| 255 | ENSG00000185507 | 15.1967442 | 42.4452835 | -1.4744067 | 0.01548729 | IRF7       | 11 | protein_coding   | interferon regulatory factor 7 [Source:HGNC Symbol;Acc    |
| 256 | ENSG00000075461 | 15.1967442 | 42.4452835 | -1.4744067 | 0.01548729 | CACNG4     | 17 | protein_coding   | calcium voltage-gated channel auxiliary subunit gamma     |
| 257 | ENSG00000269901 | 16.209787  | 44.4195331 | -1.4474332 | 0.01570992 | AC010531.5 | 16 | antisense        | novel transcript, antisense to FBXO31                     |
| 258 | ENSG00000154237 | 41.5358633 | 96.7371475 | -1.2172944 | 0.01571107 | LRRK1      | 15 | protein_coding   | leucine rich repeat kinase 1 [Source:HGNC Symbol;Acc:t    |
| 259 | ENSG00000244687 | 59.7706398 | 133.260764 | -1.15512   | 0.01598344 | UBE2V1     | 20 | protein_coding   | ubiquitin conjugating enzyme E2 V1 [Source:HGNC Symb      |
| 260 | ENSG00000229167 | 18.2358728 | 48.3680324 | -1.4012616 | 0.01607015 | AC114488.1 | 1  | antisense        | novel transcript                                          |
| 261 | ENSG00000159433 | 270.483618 | 553.775917 | -1.0334288 | 0.01622135 | STARD9     | 15 | protein_coding   | StAR related lipid transfer domain containing 9 [Source   |
| 262 | ENSG00000072840 | 220.844502 | 454.076315 | -1.0394952 | 0.01631141 | EVC        | 4  | protein_coding   | EvC ciliary complex subunit 1 [Source:HGNC Symbol;Ac      |
| 263 | ENSG00000079308 | 1188.30073 | 2380.94386 | -1.0025596 | 0.01631189 | TNS1       | 2  | protein_coding   | tensin 1 [Source:HGNC Symbol;Acc:HGNC:11973]              |
| 264 | ENSG00000275747 | 4.05328324 | 17.7671604 | -2.0988192 | 0.01649288 | IGHV3-79   | 14 | IG_V_pseudogen   | immunoglobulin heavy variable 3-79 (pseudogene) [Sou      |
| 265 | ENSG00000228218 | 4.05328324 | 17.7671604 | -2.0988192 | 0.01649288 | ATF4P3     | 17 | processed_pseud  | activating transcription factor 4 pseudogene 3 [Source:   |
| 266 | ENSG00000142920 | 26.3402168 | 64.1620294 | -1.2805145 | 0.01682585 | AZIN2      | 1  | protein_coding   | antizyme inhibitor 2 [Source:HGNC Symbol;Acc:HGNC:2       |
| 267 | ENSG00000260428 | 28.3663029 | 68.1105286 | -1.2600801 | 0.01691656 | SCX        | 8  | protein_coding   | scleraxis bHLH transcription factor [Source:HGNC Symb     |
| 268 | ENSG00000180747 | 124.605402 | 260.59986  | -1.0637337 | 0.01720046 | SMG1P3     | 16 | transcribed_unpr | SMG1 pseudogene 3 [Source:HGNC Symbol;Acc:HGNC:4          |
| 269 | ENSG00000257596 | 12.157616  | 34.5482846 | -1.4973814 | 0.01786044 | AC078778.1 | 12 | antisense        | novel transcript, antisense to CBX5                       |
| 270 | ENSG00000235908 | 2.02720959 | 12.8315343 | -2.5906695 | 0.01786222 | RHOA-IT1   | 3  | sense_intronic   | RHOA intronic transcript 1 [Source:HGNC Symbol;Acc:H      |
| 271 | ENSG00000277968 | 2.02720959 | 12.8315343 | -2.5906695 | 0.01786222 | RF02038    | 5  | misc_RNA         |                                                           |
| 272 | ENSG00000231701 | 2.02720959 | 12.8315343 | -2.5906695 | 0.01786222 | BMS1P13    | 9  | unprocessed_pse  | BMS1, ribosome biogenesis factor pseudogene 13 [Sou       |
| 273 | ENSG00000262152 | 2.02720959 | 12.8315343 | -2.5906695 | 0.01786222 | LINC00514  | 16 | processed_transc | long intergenic non-protein coding RNA 514 [Source:HG     |
| 274 | ENSG00000126861 | 2.02720959 | 12.8315343 | -2.5906695 | 0.01786222 | OMG        | 17 | protein_coding   | oligodendrocyte myelin glycoprotein [Source:HGNC Syn      |
| 275 | ENSG00000278829 | 2.02720959 | 12.8315343 | -2.5906695 | 0.01786222 | AC099811.5 | 17 | sense_intronic   | novel transcript, sense intronic to STAT5B                |
| 276 | ENSG00000265678 | 2.02720959 | 12.8315343 | -2.5906695 | 0.01786222 | AC129510.1 | 17 | antisense        | novel transcript, antisense CCDC57                        |
| 277 | ENSG00000272491 | 5.06632294 | 19.7414106 | -1.9365457 | 0.01800317 | AL109659.2 | 1  | antisense        | novel transcript, antisense to SLC5A9                     |
| 278 | ENSG00000137496 | 88.1358481 | 185.578377 | -1.0731809 | 0.01848975 | IL18BP     | 11 | protein_coding   | interleukin 18 binding protein [Source:HGNC Symbol;Ac     |
| 279 | ENSG00000185615 | 15.1967442 | 40.4710338 | -1.4059006 | 0.01850271 | PDIA2      | 16 | protein_coding   | protein disulfide isomerase family A member 2 [Source     |
| 280 | ENSG00000260029 | 15.1967442 | 40.4710338 | -1.4059006 | 0.01850271 | AC007608.2 | 16 | antisense        | novel transcript, antisense to NKD1                       |



|     |                 |            |            |            |            |            |    |                  |                                                      |
|-----|-----------------|------------|------------|------------|------------|------------|----|------------------|------------------------------------------------------|
| 281 | ENSG00000183153 | 16.209787  | 43.4324083 | -1.4151037 | 0.01863969 | GJD3       | 17 | protein_coding   | gap junction protein delta 3 [Source:HGNC Symbol;A   |
| 282 | ENSG00000156966 | 19.2489157 | 49.3551573 | -1.3528481 | 0.01890245 | B3GNT7     | 2  | protein_coding   | UDP-GlcNAc:betaGal beta-1,3-N-acetylglucosaminyl     |
| 283 | ENSG00000112276 | 25.3271738 | 61.200655  | -1.2687897 | 0.01904724 | BVES       | 6  | protein_coding   | blood vessel epicardial substance [Source:HGNC Syr   |
| 284 | ENSG00000228060 | 6.07936364 | 21.7156606 | -1.8159916 | 0.01913737 | AL365277.1 | 1  | antisense        | uncharacterized LOC101929516 [Source:NCBI gene;]     |
| 285 | ENSG00000260005 | 6.07936364 | 21.7156606 | -1.8159916 | 0.01913737 | AC027601.1 | 17 | antisense        | uncharacterized LOC105371925 [Source:NCBI gene;]     |
| 286 | ENSG00000188167 | 100.292366 | 208.282247 | -1.0534199 | 0.01980039 | TMPPE      | 3  | protein_coding   | transmembrane protein with metallophosphoesteras     |
| 287 | ENSG00000253372 | 7.09240497 | 23.6899106 | -1.7226006 | 0.01998788 | AC016405.1 | 8  | sense_intronic   | novel transcript                                     |
| 288 | ENSG00000047662 | 3.04024516 | 14.8057849 | -2.2385182 | 0.02095211 | FAM184B    | 4  | protein_coding   | family with sequence similarity 184 member B [Sour   |
| 289 | ENSG00000262558 | 3.04024516 | 14.8057849 | -2.2385182 | 0.02095211 | AC129507.3 | 17 | antisense        | novel transcript, antisense to RPH3AL                |
| 290 | ENSG00000229222 | 3.04024516 | 14.8057849 | -2.2385182 | 0.02095211 | KRT18P4    | 20 | processed_pseud  | keratin 18 pseudogene 4 [Source:HGNC Symbol;Acc:     |
| 291 | ENSG00000228817 | 3.04024516 | 14.8057849 | -2.2385182 | 0.02095211 | BACH1-IT2  | 21 | lincRNA          | BACH1 intronic transcript 2 [Source:HGNC Symbol;A    |
| 292 | ENSG00000275131 | 32.4184753 | 74.0332774 | -1.1883092 | 0.02107841 | AC241952.1 | 1  | transcribed_unpr | phosphodiesterase 4D interacting protein-like [Sour  |
| 293 | ENSG00000146197 | 32.4184753 | 74.0332774 | -1.1883092 | 0.02107841 | SCUBE3     | 6  | protein_coding   | signal peptide, CUB domain and EGF like domain coi   |
| 294 | ENSG00000153531 | 9.11848879 | 27.6384104 | -1.5869045 | 0.02109633 | ADPRHL1    | 13 | protein_coding   | ADP-ribosylhydrolase like 1 [Source:HGNC Symbol;A    |
| 295 | ENSG00000279801 | 9.11848879 | 27.6384104 | -1.5869045 | 0.02109633 | AC111170.3 | 17 | TEC              | TEC                                                  |
| 296 | ENSG00000285701 | 1.01417189 | 9.87015775 | -3.1348432 | 0.02156655 | AL357140.5 | 1  | antisense        | novel transcript, antisense to CTNNBIP1              |
| 297 | ENSG00000275557 | 1.01417189 | 9.87015775 | -3.1348432 | 0.02156655 | AC242842.1 | 1  | processed_transc | novel transcript                                     |
| 298 | ENSG00000214837 | 1.01417189 | 9.87015775 | -3.1348432 | 0.02156655 | LINC01347  | 1  | transcribed_unpr | long intergenic non-protein coding RNA 1347 [Sourc   |
| 299 | ENSG00000224618 | 1.01417189 | 9.87015775 | -3.1348432 | 0.02156655 | AC096921.1 | 3  | processed_pseud  | ectodermal-neural cortex (ENC1) pseudogene           |
| 300 | ENSG00000280417 | 1.01417189 | 9.87015775 | -3.1348432 | 0.02156655 | AC096887.2 | 3  | TEC              | TEC                                                  |
| 301 | ENSG00000248774 | 1.01417189 | 9.87015775 | -3.1348432 | 0.02156655 | AC097534.1 | 4  | antisense        | novel transcript                                     |
| 302 | ENSG00000204758 | 1.01417189 | 9.87015775 | -3.1348432 | 0.02156655 | AC008429.1 | 5  | antisense        | uncharacterized LOC100268168 [Source:NCBI gene;Acc   |
| 303 | ENSG00000199332 | 1.01417189 | 9.87015775 | -3.1348432 | 0.02156655 | RF00019    | 6  | misc_RNA         |                                                      |
| 304 | ENSG00000228653 | 1.01417189 | 9.87015775 | -3.1348432 | 0.02156655 | HNRNPCP7   | 7  | processed_pseud  | heterogeneous nuclear ribonucleoprotein C pseudogen  |
| 305 | ENSG00000242798 | 1.01417189 | 9.87015775 | -3.1348432 | 0.02156655 | AC073842.2 | 7  | antisense        | novel transcript                                     |
| 306 | ENSG00000229413 | 1.01417189 | 9.87015775 | -3.1348432 | 0.02156655 | AC018638.1 | 7  | processed_pseud  | novel pseudogene                                     |
| 307 | ENSG00000061337 | 1.01417189 | 9.87015775 | -3.1348432 | 0.02156655 | LZTS1      | 8  | protein_coding   | leucine zipper tumor suppressor 1 [Source:HGNC Symb  |
| 308 | ENSG00000250569 | 1.01417189 | 9.87015775 | -3.1348432 | 0.02156655 | NTAN1P2    | 8  | processed_pseud  | N-terminal asparagine amidase pseudogene 2 [Source:  |
| 309 | ENSG00000278988 | 1.01417189 | 9.87015775 | -3.1348432 | 0.02156655 | AL356490.1 | 9  | TEC              | tec                                                  |
| 310 | ENSG00000228828 | 1.01417189 | 9.87015775 | -3.1348432 | 0.02156655 | TLK2P2     | 10 | processed_pseud  | tousled like kinase 2 pseudogene 2 [Source:HGNC Sym  |
| 311 | ENSG00000232470 | 1.01417189 | 9.87015775 | -3.1348432 | 0.02156655 | AL136368.1 | 10 | lincRNA          | novel transcript                                     |
| 312 | ENSG00000258048 | 1.01417189 | 9.87015775 | -3.1348432 | 0.02156655 | AC073569.2 | 12 | lincRNA          | novel transcript                                     |
| 313 | ENSG00000169508 | 1.01417189 | 9.87015775 | -3.1348432 | 0.02156655 | GPR183     | 13 | protein_coding   | G protein-coupled receptor 183 [Source:HGNC Symbol;] |
| 314 | ENSG00000273618 | 1.01417189 | 9.87015775 | -3.1348432 | 0.02156655 | AL135999.2 | 14 | antisense        | TEC                                                  |
| 315 | ENSG00000237356 | 1.01417189 | 9.87015775 | -3.1348432 | 0.02156655 | AL365295.1 | 14 | processed_transc | novel transcript                                     |
| 316 | ENSG00000226132 | 1.01417189 | 9.87015775 | -3.1348432 | 0.02156655 | RPS3AP46   | 14 | processed_pseud  | ribosomal protein S3a pseudogene 46 [Source:HGNC Sy  |
| 317 | ENSG00000169918 | 1.01417189 | 9.87015775 | -3.1348432 | 0.02156655 | OTUD7A     | 15 | protein_coding   | OTU deubiquitinase 7A [Source:HGNC Symbol;Acc:HGN    |
| 318 | ENSG00000276384 | 1.01417189 | 9.87015775 | -3.1348432 | 0.02156655 | AC016876.3 | 17 | antisense        | novel transcript, antisense to TNFSF12               |
| 319 | ENSG00000279281 | 1.01417189 | 9.87015775 | -3.1348432 | 0.02156655 | AC015883.1 | 17 | TEC              | TEC                                                  |
| 320 | ENSG00000280486 | 1.01417189 | 9.87015775 | -3.1348432 | 0.02156655 | AC005329.3 | 19 | antisense        | novel transcript, antisense to NDUFS7                |

|     |                 |            |            |            |            |            |    |                       |                                                                  |
|-----|-----------------|------------|------------|------------|------------|------------|----|-----------------------|------------------------------------------------------------------|
| 321 | ENSG00000236890 | 1.01417189 | 9.87015775 | -3.1348432 | 0.02156655 | AC016027.5 | 22 | processed_pseud       | ribosomal protein L18a (RPL18A) pseudogene                       |
| 322 | ENSG00000227192 | 25.3271738 | 60.2135302 | -1.2453789 | 0.02163149 | AL023581.2 | 6  | lincRNA               | novel transcript                                                 |
| 323 | ENSG00000203865 | 11.1445735 | 31.58691   | -1.4927826 | 0.02169529 | ATP1A1-AS1 | 1  | processed_transcript  | ATP1A1 antisense RNA 1 [Source:HGNC Symbol;Acc:HGNC:31250]       |
| 324 | ENSG00000176920 | 11.1445735 | 31.58691   | -1.4927826 | 0.02169529 | FUT2       | 19 | protein_coding        | fucosyltransferase 2 [Source:HGNC Symbol;Acc:HGNC:2925]          |
| 325 | ENSG00000228624 | 12.157616  | 33.5611598 | -1.4557142 | 0.02187215 | HDAC2-AS2  | 6  | antisense             | HDAC2 and HS3ST5 antisense RNA 2 [Source:Ensembl]                |
| 326 | ENSG00000277496 | 12.157616  | 33.5611598 | -1.4557142 | 0.02187215 | AL357033.4 | 20 | antisense             | novel transcript, antisense to SLCO4A1                           |
| 327 | ENSG00000226363 | 21.2750017 | 52.3165317 | -1.2932029 | 0.02191967 | HAGLROS    | 2  | lincRNA               | HAGLR opposite strand lincRNA [Source:Ensembl]                   |
| 328 | ENSG00000215156 | 13.1706587 | 35.5354095 | -1.4235316 | 0.02199107 | AC138409.1 | 5  | processed_pseud       | integral membrane glycoprotein-like [Source:Ensembl]             |
| 329 | ENSG00000187800 | 15.1967442 | 39.4839089 | -1.3703877 | 0.02210299 | PEAR1      | 1  | protein_coding        | platelet endothelial aggregation receptor 1                      |
| 330 | ENSG00000206651 | 1.39E-17   | 6.90877955 | -5.8146434 | 0.02267682 | RF00019    | 1  | misc_RNA              |                                                                  |
| 331 | ENSG00000231084 | 1.39E-17   | 6.90877955 | -5.8146434 | 0.02267682 | RPL22P24   | 1  | processed_pseud       | ribosomal protein L22 pseudogene 24                              |
| 332 | ENSG00000162849 | 1.39E-17   | 6.90877955 | -5.8146434 | 0.02267682 | KIF26B     | 1  | protein_coding        | kinesin family member 26B [Source:HGNC Symbol;Acc:HGNC:2925]     |
| 333 | ENSG00000115353 | 1.39E-17   | 6.90877955 | -5.8146434 | 0.02267682 | TACR1      | 2  | protein_coding        | tachykinin receptor 1 [Source:HGNC Symbol;Acc:HGNC:2925]         |
| 334 | ENSG00000114948 | 1.39E-17   | 6.90877955 | -5.8146434 | 0.02267682 | ADAM23     | 2  | protein_coding        | ADAM metalloproteinase domain 23 [Source:Ensembl]                |
| 335 | ENSG00000225493 | 1.39E-17   | 6.90877955 | -5.8146434 | 0.02267682 | LINC01107  | 2  | lincRNA               | long intergenic non-protein coding RNA 107                       |
| 336 | ENSG00000172020 | 1.39E-17   | 6.90877955 | -5.8146434 | 0.02267682 | GAP43      | 3  | protein_coding        | growth associated protein 43 [Source:Ensembl]                    |
| 337 | ENSG00000249047 | 1.39E-17   | 6.90877955 | -5.8146434 | 0.02267682 | COX6B1P5   | 4  | processed_pseud       | cytochrome c oxidase subunit 6B1 pseudogene                      |
| 338 | ENSG00000279481 | 1.39E-17   | 6.90877955 | -5.8146434 | 0.02267682 | AC104791.2 | 4  | TEC                   | TEC                                                              |
| 339 | ENSG00000272123 | 1.39E-17   | 6.90877955 | -5.8146434 | 0.02267682 | AC008966.2 | 5  | antisense             | novel transcript, antisense to ITGA2                             |
| 340 | ENSG00000253333 | 1.39E-17   | 6.90877955 | -5.8146434 | 0.02267682 | AC146944.3 | 5  | unprocessed_pseud     | glucuronidase, beta (GUSB) pseudogene                            |
| 341 | ENSG00000120329 | 1.39E-17   | 6.90877955 | -5.8146434 | 0.02267682 | SLC25A2    | 5  | protein_coding        | solute carrier family 25 member 2 [Source:Ensembl]               |
| 342 | ENSG00000236714 | 1.39E-17   | 6.90877955 | -5.8146434 | 0.02267682 | LINC01844  | 5  | lincRNA               | long intergenic non-protein coding RNA 1844                      |
| 343 | ENSG00000277039 | 1.39E-17   | 6.90877955 | -5.8146434 | 0.02267682 | RF00017    | 5  | misc_RNA              |                                                                  |
| 344 | ENSG00000124493 | 1.39E-17   | 6.90877955 | -5.8146434 | 0.02267682 | GRM4       | 6  | protein_coding        | glutamate metabotropic receptor 4 [Source:Ensembl]               |
| 345 | ENSG00000279659 | 1.39E-17   | 6.90877955 | -5.8146434 | 0.02267682 | AL451064.2 | 6  | TEC                   | TEC                                                              |
| 346 | ENSG00000226310 | 1.39E-17   | 6.90877955 | -5.8146434 | 0.02267682 | AL022157.1 | X  | antisense             | novel transcript                                                 |
| 347 | ENSG00000172733 | 1.39E-17   | 6.90877955 | -5.8146434 | 0.02267682 | PURG       | 8  | protein_coding        | purine rich element binding protein G [Source:Ensembl]           |
| 348 | ENSG00000254388 | 1.39E-17   | 6.90877955 | -5.8146434 | 0.02267682 | DUTP2      | 8  | processed_pseud       | deoxyuridine triphosphatase pseudogene                           |
| 349 | ENSG00000279786 | 1.39E-17   | 6.90877955 | -5.8146434 | 0.02267682 | AC105235.1 | 8  | TEC                   | TEC                                                              |
| 350 | ENSG00000254973 | 1.39E-17   | 6.90877955 | -5.8146434 | 0.02267682 | AC105219.3 | 8  | lincRNA               | novel transcript                                                 |
| 351 | ENSG00000183784 | 1.39E-17   | 6.90877955 | -5.8146434 | 0.02267682 | C9orf66    | 9  | protein_coding        | chromosome 9 open reading frame 66 [Source:Ensembl]              |
| 352 | ENSG00000225408 | 1.39E-17   | 6.90877955 | -5.8146434 | 0.02267682 | AL136980.1 | 9  | antisense             | novel transcript                                                 |
| 353 | ENSG00000231697 | 1.39E-17   | 6.90877955 | -5.8146434 | 0.02267682 | NANOGP5    | 9  | transcribed_processed | Nanog homeobox pseudogene 5 [Source:Ensembl]                     |
| 354 | ENSG00000213221 | 1.39E-17   | 6.90877955 | -5.8146434 | 0.02267682 | DNLZ       | 9  | protein_coding        | DNL-type zinc finger [Source:HGNC Symbol;Acc:HGNC:2925]          |
| 355 | ENSG00000236394 | 1.39E-17   | 6.90877955 | -5.8146434 | 0.02267682 | AL807752.4 | 9  | antisense             | uncharacterized LOC105376327 [Source:Ensembl]                    |
| 356 | ENSG00000225140 | 1.39E-17   | 6.90877955 | -5.8146434 | 0.02267682 | AL358216.1 | 10 | antisense             | novel transcript                                                 |
| 357 | ENSG00000185933 | 1.39E-17   | 6.90877955 | -5.8146434 | 0.02267682 | CALHM1     | 10 | protein_coding        | calcium homeostasis modulator 1 [Source:Ensembl]                 |
| 358 | ENSG00000188916 | 1.39E-17   | 6.90877955 | -5.8146434 | 0.02267682 | INSYN2     | 10 | protein_coding        | inhibitory synaptic factor 2A [Source:HGNC Symbol;Acc:HGNC:2925] |
| 359 | ENSG00000174527 | 1.39E-17   | 6.90877955 | -5.8146434 | 0.02267682 | MYO1H      | 12 | protein_coding        | myosin IH [Source:HGNC Symbol;Acc:HGNC:2925]                     |
| 360 | ENSG00000273784 | 1.39E-17   | 6.90877955 | -5.8146434 | 0.02267682 | AL137058.2 | 13 | processed_transcript  | novel transcript                                                 |



|     |                 |            |            |            |            |            |    |                  |                                                 |
|-----|-----------------|------------|------------|------------|------------|------------|----|------------------|-------------------------------------------------|
| 361 | ENSG00000254656 | 1.39E-17   | 6.90877955 | -5.8146434 | 0.02267682 | RTL1       | 14 | protein_coding   | retrotransposon Gag like 1 [Source:HGNC         |
| 362 | ENSG00000259654 | 1.39E-17   | 6.90877955 | -5.8146434 | 0.02267682 | AC115102.1 | 15 | antisense        | novel transcript, antisense to SEC11A           |
| 363 | ENSG00000225193 | 1.39E-17   | 6.90877955 | -5.8146434 | 0.02267682 | RPS12P26   | 15 | transcribed_pro  | ribosomal protein S12 pseudogene 26 [Sc         |
| 364 | ENSG00000127588 | 1.39E-17   | 6.90877955 | -5.8146434 | 0.02267682 | GNG13      | 16 | protein_coding   | G protein subunit gamma 13 [Source:HGNC         |
| 365 | ENSG00000279901 | 1.39E-17   | 6.90877955 | -5.8146434 | 0.02267682 | AC092117.2 | 16 | TEC              | tec                                             |
| 366 | ENSG00000154102 | 1.39E-17   | 6.90877955 | -5.8146434 | 0.02267682 | C16orf74   | 16 | protein_coding   | chromosome 16 open reading frame 74 [S          |
| 367 | ENSG00000267048 | 1.39E-17   | 6.90877955 | -5.8146434 | 0.02267682 | AC092143.3 | 16 | processed_transc | novel transcript (MC1R-TUBB3 readthrou          |
| 368 | ENSG00000181885 | 1.39E-17   | 6.90877955 | -5.8146434 | 0.02267682 | CLDN7      | 17 | protein_coding   | claudin 7 [Source:HGNC Symbol;Acc:HGNC          |
| 369 | ENSG00000262298 | 1.39E-17   | 6.90877955 | -5.8146434 | 0.02267682 | AC004584.1 | 17 | antisense        | novel transcript, antisense to COIL             |
| 370 | ENSG00000267529 | 1.39E-17   | 6.90877955 | -5.8146434 | 0.02267682 | AP005131.4 | 18 | processed_transc | novel transcript, antisense C18orf1             |
| 371 | ENSG00000278075 | 1.39E-17   | 6.90877955 | -5.8146434 | 0.02267682 | AC114341.1 | 18 | lincRNA          | novel transcript                                |
| 372 | ENSG00000104951 | 1.39E-17   | 6.90877955 | -5.8146434 | 0.02267682 | IL4I1      | 19 | protein_coding   | interleukin 4 induced 1 [Source:HGNC Syr        |
| 373 | ENSG00000273032 | 1.39E-17   | 6.90877955 | -5.8146434 | 0.02267682 | DGCR9      | 22 | processed_transc | DiGeorge syndrome critical region gene 9        |
| 374 | ENSG00000073146 | 1.39E-17   | 6.90877955 | -5.8146434 | 0.02267682 | MOV10L1    | 22 | protein_coding   | Mov10 like RISC complex RNA helicase 1          |
| 375 | ENSG00000260948 | 4.05328324 | 16.7800353 | -2.0169497 | 0.02307085 | AL390195.2 | 1  | sense_overlappin | novel transcript, sense overlapping WDR         |
| 376 | ENSG00000207280 | 4.05328324 | 16.7800353 | -2.0169497 | 0.02307085 | SNORD20    | 2  | snoRNA           | small nucleolar RNA, C/D box 20 [Source:        |
| 377 | ENSG00000201207 | 4.05328324 | 16.7800353 | -2.0169497 | 0.02307085 | RF00019    | 6  | misc_RNA         |                                                 |
| 378 | ENSG00000184937 | 4.05328324 | 16.7800353 | -2.0169497 | 0.02307085 | WT1        | 11 | protein_coding   | Wilms tumor 1 [Source:HGNC Symbol;Acc           |
| 379 | ENSG00000105695 | 4.05328324 | 16.7800353 | -2.0169497 | 0.02307085 | MAG        | 19 | protein_coding   | myelin associated glycoprotein [Source:H        |
| 380 | ENSG00000197283 | 93.2010639 | 189.526876 | -1.0230269 | 0.0239684  | SYNGAP1    | 6  | protein_coding   | synaptic Ras GTPase activating protein 1        |
| 381 | ENSG00000279602 | 5.06632294 | 18.7542855 | -1.8630228 | 0.0245106  | AC109326.1 | 17 | TEC              | TEC                                             |
| 382 | ENSG00000164142 | 60.7836829 | 128.32514  | -1.0765268 | 0.0249924  | FAM160A1   | 4  | protein_coding   | family with sequence similarity 160 member      |
| 383 | ENSG00000246575 | 46.6010789 | 100.685647 | -1.1093975 | 0.02542063 | AC093162.2 | 2  | unprocessed_pse  | retinol saturase (all-trans-retinol 13,14-reduc |
| 384 | ENSG00000227959 | 6.07936364 | 20.7285356 | -1.7492705 | 0.0254753  | AL451042.2 | 1  | antisense        | novel transcript                                |
| 385 | ENSG00000207554 | 19.2489157 | 47.3809076 | -1.2941062 | 0.02567534 | MIR647     | 20 | miRNA            | microRNA 647 [Source:HGNC Symbol;Acc:HGT        |
| 386 | ENSG00000231240 | 17.2228299 | 43.4324083 | -1.3282904 | 0.02605029 | KLF2P1     | 2  | processed_pseud  | Kruppel like factor 2 pseudogene 1 [Source:H    |
| 387 | ENSG00000205041 | 17.2228299 | 43.4324083 | -1.3282904 | 0.02605029 | AC118344.1 | 19 | sense_intronic   | novel transcript, sense intronic to AKT2        |
| 388 | ENSG00000145020 | 7.09240497 | 22.7027856 | -1.6615292 | 0.02610533 | AMT        | 3  | protein_coding   | aminomethyltransferase [Source:HGNC Symb        |
| 389 | ENSG00000283128 | 7.09240497 | 22.7027856 | -1.6615292 | 0.02610533 | AC009403.2 | 7  | processed_transc | novel transcript                                |
| 390 | ENSG00000279605 | 7.09240497 | 22.7027856 | -1.6615292 | 0.02610533 | AC067930.6 | 8  | TEC              | TEC                                             |
| 391 | ENSG00000071246 | 7.09240497 | 22.7027856 | -1.6615292 | 0.02610533 | VASH1      | 14 | protein_coding   | vasohibin 1 [Source:HGNC Symbol;Acc:HGNC:       |
| 392 | ENSG00000197744 | 16.209787  | 40.4710338 | -1.313527  | 0.02622973 | PTMAP2     | 5  | processed_pseud  | prothymosin alpha pseudogene 2 [Source:HG       |
| 393 | ENSG00000179776 | 16.209787  | 40.4710338 | -1.313527  | 0.02622973 | CDH5       | 16 | protein_coding   | cadherin 5 [Source:HGNC Symbol;Acc:HGNC:1       |
| 394 | ENSG00000198342 | 14.1837014 | 36.5225344 | -1.3569773 | 0.02655207 | ZNF442     | 19 | protein_coding   | zinc finger protein 442 [Source:HGNC Symbol;    |
| 395 | ENSG00000276603 | 9.11848879 | 26.6512854 | -1.5346776 | 0.02672002 | AL109614.1 | 20 | sense_intronic   | novel transcript, sense intronic to BLCAP       |
| 396 | ENSG00000114670 | 12.157616  | 32.5740349 | -1.4128077 | 0.02678003 | NEK11      | 3  | protein_coding   | NIMA related kinase 11 [Source:HGNC Symbo       |
| 397 | ENSG00000163596 | 29.379346  | 66.136279  | -1.1673159 | 0.0267866  | ICA1L      | 2  | protein_coding   | islet cell autoantigen 1 like [Source:HGNC Syr  |
| 398 | ENSG00000241404 | 10.1315311 | 28.6255353 | -1.4872559 | 0.02682007 | EGFL8      | 6  | protein_coding   | EGF like domain multiple 8 [Source:HGNC Syr     |
| 399 | ENSG00000151320 | 10.1315311 | 28.6255353 | -1.4872559 | 0.02682007 | AKAP6      | 14 | protein_coding   | A-kinase anchoring protein 6 [Source:HGNC S     |
| 400 | ENSG00000261654 | 2.02720959 | 11.8444089 | -2.4763515 | 0.02704271 | AL360270.2 | 1  | sense_overlappin | novel transcript, sense overlapping C1orf103    |

|     |                 |            |            |            |            |               |    |                         |                                                                                  |
|-----|-----------------|------------|------------|------------|------------|---------------|----|-------------------------|----------------------------------------------------------------------------------|
| 401 | ENSG00000249084 | 2.02720959 | 11.8444089 | -2.4763515 | 0.02704271 | AC027627.1    | 4  | antisense               | novel transcript                                                                 |
| 402 | ENSG00000227351 | 2.02720959 | 11.8444089 | -2.4763515 | 0.02704271 | NANOGP6       | 10 | processed_pseud         | Nanog homeobox pseudogene 6 [Source:HGNC Symbol]                                 |
| 403 | ENSG00000258735 | 2.02720959 | 11.8444089 | -2.4763515 | 0.02704271 | LINC00637     | 14 | lincRNA                 | long intergenic non-protein coding RNA 637 [Source:HGNC Symbol]                  |
| 404 | ENSG00000265845 | 2.02720959 | 11.8444089 | -2.4763515 | 0.02704271 | AC024267.4    | 17 | antisense               | uncharacterized LOC101927018 [Source:NCBI gene;Acc:U08257]                       |
| 405 | ENSG00000213228 | 2.02720959 | 11.8444089 | -2.4763515 | 0.02704271 | RPL12P38      | 17 | transcribed_pseud       | ribosomal protein L12 pseudogene 38 [Source:HGNC Symbol]                         |
| 406 | ENSG00000265912 | 2.02720959 | 11.8444089 | -2.4763515 | 0.02704271 | AC037487.1    | 17 | lincRNA                 | novel transcript                                                                 |
| 407 | ENSG00000267934 | 2.02720959 | 11.8444089 | -2.4763515 | 0.02704271 | AC010300.1    | 19 | antisense               | novel transcript, antisense to ZNF91                                             |
| 408 | ENSG00000187642 | 49.6402084 | 104.634146 | -1.0739135 | 0.02894954 | PERM1         | 1  | protein_coding          | PPARGC1 and ESRR induced regulator, muscle 1 [Source:HGNC Symbol;Acc:U08257]     |
| 409 | ENSG00000273899 | 29.379346  | 65.1491542 | -1.145662  | 0.03002198 | NOL12         | 22 | protein_coding          | nucleolar protein 12 [Source:HGNC Symbol;Acc:U08257]                             |
| 410 | ENSG00000258366 | 68.8880282 | 140.170638 | -1.0235636 | 0.03015728 | RTEL1         | 20 | protein_coding          | regulator of telomere elongation helicase 1 [Source:HGNC Symbol;Acc:U08257]      |
| 411 | ENSG00000269068 | 3.04024516 | 13.8186597 | -2.1398449 | 0.03034815 | AC009955.4    | 2  | antisense               | novel transcript, antisense to OBSL1                                             |
| 412 | ENSG00000260651 | 3.04024516 | 13.8186597 | -2.1398449 | 0.03034815 | AF213884.3    | 4  | antisense               | novel transcript, antisense NFKB1                                                |
| 413 | ENSG00000260996 | 3.04024516 | 13.8186597 | -2.1398449 | 0.03034815 | BX255925.1    | 9  | sense_overlapping       | novel transcript, overlapping NRARP                                              |
| 414 | ENSG00000226627 | 3.04024516 | 13.8186597 | -2.1398449 | 0.03034815 | SHANK2-AS1    | 11 | antisense               | SHANK2 antisense RNA 1 [Source:HGNC Symbol;Acc:U08257]                           |
| 415 | ENSG00000227374 | 3.04024516 | 13.8186597 | -2.1398449 | 0.03034815 | AL157832.1    | 10 | lincRNA                 | novel transcript                                                                 |
| 416 | ENSG00000123009 | 3.04024516 | 13.8186597 | -2.1398449 | 0.03034815 | NME2P1        | 12 | processed_pseud         | NME/NM23 nucleoside diphosphate kinase 2 pseudogene 1 [Source:HGNC Symbol]       |
| 417 | ENSG00000242085 | 3.04024516 | 13.8186597 | -2.1398449 | 0.03034815 | RPS20P33      | 14 | processed_pseud         | ribosomal protein S20 pseudogene 33 [Source:HGNC Symbol]                         |
| 418 | ENSG00000257950 | 3.04024516 | 13.8186597 | -2.1398449 | 0.03034815 | P2RX5-TAX1BP3 | 17 | protein_coding          | P2RX5-TAX1BP3 readthrough (NMD candidate) [Source:HGNC Symbol;Acc:U08257]        |
| 419 | ENSG00000167874 | 3.04024516 | 13.8186597 | -2.1398449 | 0.03034815 | TMEM88        | 17 | protein_coding          | transmembrane protein 88 [Source:HGNC Symbol;Acc:U08257]                         |
| 420 | ENSG00000263006 | 3.04024516 | 13.8186597 | -2.1398449 | 0.03034815 | ROCK1P1       | 18 | transcribed_unprocessed | Rho associated coiled-coil containing protein kinase 1 [Source:HGNC Symbol]      |
| 421 | ENSG00000235065 | 3.04024516 | 13.8186597 | -2.1398449 | 0.03034815 | RPL24P2       | 20 | processed_pseud         | ribosomal protein L24 pseudogene 2 [Source:HGNC Symbol]                          |
| 422 | ENSG00000285979 | 63.8228124 | 130.29939  | -1.0282835 | 0.03138531 | AC009090.6    | 16 | antisense               | novel transcript, antisense to FAM192A                                           |
| 423 | ENSG00000086730 | 15.1967442 | 37.5096592 | -1.2966267 | 0.0315204  | LAT2          | 7  | protein_coding          | linker for activation of T cells family member 2 [Source:HGNC Symbol;Acc:U08257] |
| 424 | ENSG00000050555 | 40.5228202 | 86.8658997 | -1.0977434 | 0.03169889 | LAMC3         | 9  | protein_coding          | laminin subunit gamma 3 [Source:HGNC Symbol;Acc:U08257]                          |
| 425 | ENSG00000278467 | 14.1837014 | 35.5354095 | -1.3175856 | 0.03194235 | AC138393.3    | 1  | lincRNA                 | novel transcript                                                                 |
| 426 | ENSG00000279162 | 4.05328324 | 15.7929101 | -1.9301534 | 0.03229224 | AC141586.5    | 16 | TEC                     | tec                                                                              |
| 427 | ENSG00000167617 | 22.2880447 | 51.3294069 | -1.1990572 | 0.03312109 | CDC42EP5      | 19 | protein_coding          | CDC42 effector protein 5 [Source:HGNC Symbol;Acc:U08257]                         |
| 428 | ENSG00000205913 | 11.1445735 | 29.6126602 | -1.4000522 | 0.03317368 | SRRM2-AS1     | 16 | antisense               | SRRM2 antisense RNA 1 [Source:HGNC Symbol;Acc:U08257]                            |
| 429 | ENSG00000254369 | 5.06632294 | 17.7671604 | -1.7855507 | 0.03337634 | HOXA-AS3      | 7  | antisense               | HOXA cluster antisense RNA 3 [Source:HGNC Symbol;Acc:U08257]                     |
| 430 | ENSG00000168916 | 10.1315311 | 27.6384104 | -1.4368538 | 0.03353309 | ZNF608        | 5  | protein_coding          | zinc finger protein 608 [Source:HGNC Symbol;Acc:U08257]                          |
| 431 | ENSG00000205414 | 29.379346  | 64.1620294 | -1.1236782 | 0.03364177 | AC007608.1    | 16 | antisense               | novel transcript, antisense to NKD1                                              |
| 432 | ENSG00000279261 | 9.11848879 | 25.6641605 | -1.4804888 | 0.03383233 | AL360294.1    | 1  | lincRNA                 | uncharacterized LOC100130249 [Source:NCBI gene;Acc:U08257]                       |
| 433 | ENSG00000274317 | 9.11848879 | 25.6641605 | -1.4804888 | 0.03383233 | LINC02334     | 13 | lincRNA                 | long intergenic non-protein coding RNA 2334 [Source:HGNC Symbol]                 |
| 434 | ENSG00000237991 | 6.07936364 | 19.7414106 | -1.6793134 | 0.03391022 | RPL35P1       | 1  | processed_pseud         | ribosomal protein L35 pseudogene 1 [Source:HGNC Symbol]                          |
| 435 | ENSG00000216316 | 6.07936364 | 19.7414106 | -1.6793134 | 0.03391022 | AL022722.1    | 6  | processed_pseud         | 60S Ribosomal Protein L13A (RPL13) pseudogene                                    |
| 436 | ENSG00000180846 | 6.07936364 | 19.7414106 | -1.6793134 | 0.03391022 | CSNK1G2-AS1   | 19 | antisense               | CSNK1G2 antisense RNA 1 [Source:HGNC Symbol;Acc:U08257]                          |
| 437 | ENSG00000197536 | 8.10544673 | 23.6899106 | -1.5330824 | 0.03403535 | C5orf56       | 5  | processed_transcript    | chromosome 5 open reading frame 56 [Source:HGNC Symbol]                          |
| 438 | ENSG00000214185 | 8.10544673 | 23.6899106 | -1.5330824 | 0.03403535 | XPOTP1        | 20 | processed_pseud         | exportin for tRNA pseudogene 1 [Source:HGNC Symbol]                              |
| 439 | ENSG00000126500 | 7.09240497 | 21.7156606 | -1.5977579 | 0.03408838 | FLRT1         | 11 | protein_coding          | fibronectin leucine rich transmembrane protein 1 [Source:HGNC Symbol]            |
| 440 | ENSG00000138316 | 7.09240497 | 21.7156606 | -1.5977579 | 0.03408838 | ADAMTS14      | 10 | protein_coding          | ADAM metalloproteinase with thrombospondin type 1 motifs                         |



|     |                 |            |            |            |            |            |    |                  |                                            |
|-----|-----------------|------------|------------|------------|------------|------------|----|------------------|--------------------------------------------|
| 441 | ENSG00000258730 | 7.09240497 | 21.7156606 | -1.5977579 | 0.03408838 | ITPK1-AS1  | 14 | antisense        | ITPK1 antisense RNA 1 [Source:HGNC Sym     |
| 442 | ENSG00000197670 | 28.3663029 | 62.1877798 | -1.1290872 | 0.03416525 | AL157838.1 | 20 | antisense        | uncharacterized LOC101927770 [Source:N     |
| 443 | ENSG00000232545 | 35.4576046 | 75.0204022 | -1.078578  | 0.03423895 | AC253536.3 | 22 | sense_intronic   | novel transcript                           |
| 444 | ENSG00000237200 | 1.01417189 | 8.88303193 | -2.984843  | 0.0348666  | ZBTB40-IT1 | 1  | sense_intronic   | ZBTB40 intronic transcript 1 [Source:HGNC  |
| 445 | ENSG00000226876 | 1.01417189 | 8.88303193 | -2.984843  | 0.0348666  | AC092801.1 | 1  | antisense        | novel transcript                           |
| 446 | ENSG00000285600 | 1.01417189 | 8.88303193 | -2.984843  | 0.0348666  | AC023593.1 | 3  | antisense        |                                            |
| 447 | ENSG00000138646 | 1.01417189 | 8.88303193 | -2.984843  | 0.0348666  | HERC5      | 4  | protein_coding   | HECT and RLD domain containing E3 ubiq     |
| 448 | ENSG00000250138 | 1.01417189 | 8.88303193 | -2.984843  | 0.0348666  | AC139495.3 | 5  | unprocessed_pse  | POM121 membrane glycoprotein-like 1 (P     |
| 449 | ENSG00000253203 | 1.01417189 | 8.88303193 | -2.984843  | 0.0348666  | GUSBP3     | 5  | transcribed_unpr | glucuronidase, beta pseudogene 3 [Source   |
| 450 | ENSG00000129595 | 1.01417189 | 8.88303193 | -2.984843  | 0.0348666  | EPB41L4A   | 5  | protein_coding   | erythrocyte membrane protein band 4.1 lik  |
| 451 | ENSG00000146006 | 1.01417189 | 8.88303193 | -2.984843  | 0.0348666  | LRRTM2     | 5  | protein_coding   | leucine rich repeat transmembrane neuror   |
| 452 | ENSG00000247925 | 1.01417189 | 8.88303193 | -2.984843  | 0.0348666  | AL139807.1 | 6  | antisense        | novel transcript                           |
| 453 | ENSG00000274594 | 1.01417189 | 8.88303193 | -2.984843  | 0.0348666  | AL391669.1 | 6  | processed_pseud  | transmembrane protein 80 (TMEM80) pse      |
| 454 | ENSG00000128596 | 1.01417189 | 8.88303193 | -2.984843  | 0.0348666  | CCDC136    | 7  | protein_coding   | coiled-coil domain containing 136 [Source: |
| 455 | ENSG00000246477 | 1.01417189 | 8.88303193 | -2.984843  | 0.0348666  | AF131216.1 | 8  | antisense        | novel transcript, antisense to MTMR9       |
| 456 | ENSG00000227852 | 1.01417189 | 8.88303193 | -2.984843  | 0.0348666  | RPS29P17   | 9  | processed_pseud  | ribosomal protein S29 pseudogene 17 [Sou   |
| 457 | ENSG00000173269 | 1.01417189 | 8.88303193 | -2.984843  | 0.0348666  | MMRN2      | 10 | protein_coding   | multimerin 2 [Source:HGNC Symbol;Acc:HC    |
| 458 | ENSG00000273108 | 1.01417189 | 8.88303193 | -2.984843  | 0.0348666  | AL121929.2 | 10 | antisense        | novel transcript, antisense to SH3PXD2A    |
| 459 | ENSG00000258302 | 1.01417189 | 8.88303193 | -2.984843  | 0.0348666  | AC025034.1 | 12 | antisense        | novel transcript, antisense to ATP2B1      |
| 460 | ENSG00000277840 | 1.01417189 | 8.88303193 | -2.984843  | 0.0348666  | AC026368.1 | 12 | sense_intronic   | novel transcript, sense intronic to FBXW8  |
| 461 | ENSG00000225083 | 1.01417189 | 8.88303193 | -2.984843  | 0.0348666  | GRTP1-AS1  | 13 | antisense        | GRTP1 antisense RNA 1 [Source:HGNC Sy      |
| 462 | ENSG00000275454 | 1.01417189 | 8.88303193 | -2.984843  | 0.0348666  | AC105020.6 | 15 | antisense        | novel transcript, antisense to IMP3        |
| 463 | ENSG00000260403 | 1.01417189 | 8.88303193 | -2.984843  | 0.0348666  | AC120498.3 | 16 | antisense        | novel transcript, antisense to CACNA1H     |
| 464 | ENSG00000260979 | 1.01417189 | 8.88303193 | -2.984843  | 0.0348666  | AC022167.3 | 16 | lincRNA          | novel transcript                           |
| 465 | ENSG00000275441 | 1.01417189 | 8.88303193 | -2.984843  | 0.0348666  | AC020765.2 | 16 | antisense        | novel transcript, antisense to CCDC101     |
| 466 | ENSG00000159618 | 1.01417189 | 8.88303193 | -2.984843  | 0.0348666  | ADGRG5     | 16 | protein_coding   | adhesion G protein-coupled receptor G5     |
| 467 | ENSG00000266126 | 1.01417189 | 8.88303193 | -2.984843  | 0.0348666  | AC005730.3 | 17 | sense_intronic   | novel transcript                           |
| 468 | ENSG00000274776 | 1.01417189 | 8.88303193 | -2.984843  | 0.0348666  | AC090241.3 | 18 | lincRNA          | novel transcript                           |
| 469 | ENSG00000267006 | 1.01417189 | 8.88303193 | -2.984843  | 0.0348666  | AC008507.2 | 19 | lincRNA          | novel transcript                           |
| 470 | ENSG00000268756 | 1.01417189 | 8.88303193 | -2.984843  | 0.0348666  | AC104534.1 | 19 | antisense        | novel transcript, antisense to ECH1        |
| 471 | ENSG00000219200 | 26.3402168 | 58.2392806 | -1.1410749 | 0.03530381 | RNASEK     | 17 | protein_coding   | ribonuclease K [Source:HGNC Symbol;Acc     |
| 472 | ENSG00000204947 | 15.1967442 | 36.5225344 | -1.258282  | 0.03762082 | ZNF425     | 7  | protein_coding   | zinc finger protein 425 [Source:HGNC Syn   |
| 473 | ENSG00000183562 | 15.1967442 | 36.5225344 | -1.258282  | 0.03762082 | AC131971.1 | 11 | antisense        | novel transcript, antisense to NAP1L4      |
| 474 | ENSG00000143570 | 14.1837014 | 34.5482846 | -1.277088  | 0.03841068 | SLC39A1    | 1  | protein_coding   | solute carrier family 39 member 1 [Source  |
| 475 | ENSG00000118263 | 34.4445615 | 72.0590278 | -1.0622448 | 0.03842835 | KLF7       | 2  | protein_coding   | Kruppel like factor 7 [Source:HGNC Symb    |
| 476 | ENSG00000223813 | 21.2750017 | 48.3680324 | -1.180273  | 0.03881785 | AC007255.1 | 7  | antisense        | novel transcript, antisense to CHN2        |
| 477 | ENSG00000187889 | 12.157616  | 30.5997851 | -1.3229656 | 0.04010141 | FYB2       | 1  | protein_coding   | FYN binding protein 2 [Source:HGNC Sym     |
| 478 | ENSG00000078237 | 12.157616  | 30.5997851 | -1.3229656 | 0.04010141 | TIGAR      | 12 | protein_coding   | TP53 induced glycolysis regulatory phosph  |
| 479 | ENSG00000174586 | 47.6141221 | 96.7371475 | -1.0208102 | 0.04013337 | ZNF497     | 19 | protein_coding   | zinc finger protein 497 [Source:HGNC Syn   |
| 480 | ENSG00000212385 | 1.39E-17   | 5.92165277 | -5.5965168 | 0.04096458 | RNU6-817P  | 1  | snRNA            | RNA, U6 small nuclear 817, pseudogene      |



|     |                 |          |            |            |            |            |    |                                    |                                                                                              |
|-----|-----------------|----------|------------|------------|------------|------------|----|------------------------------------|----------------------------------------------------------------------------------------------|
| 481 | ENSG00000232519 | 1.39E-17 | 5.92165277 | -5.5965168 | 0.04096458 | AL353807.2 | 1  | antisense                          | novel transcript, antisense to MSTO1                                                         |
| 482 | ENSG00000265706 | 1.39E-17 | 5.92165277 | -5.5965168 | 0.04096458 | SNORD53B   | 2  | snoRNA                             | small nucleolar RNA, C/D box 53B [Source:HGNC Symbol;Acc:HGNC:11138]                         |
| 483 | ENSG00000272735 | 1.39E-17 | 5.92165277 | -5.5965168 | 0.04096458 | AC007881.3 | 2  | lincRNA                            | novel transcript                                                                             |
| 484 | ENSG00000188687 | 1.39E-17 | 5.92165277 | -5.5965168 | 0.04096458 | SLC4A5     | 2  | protein_coding                     | solute carrier family 4 member 5 [Source:HGNC Symbol;Acc:HGNC:11138]                         |
| 485 | ENSG00000235947 | 1.39E-17 | 5.92165277 | -5.5965168 | 0.04096458 | EGOT       | 3  | lincRNA                            | eosinophil granule ontogeny transcript [Source:HGNC Symbol;Acc:HGNC:11138]                   |
| 486 | ENSG00000234737 | 1.39E-17 | 5.92165277 | -5.5965168 | 0.04096458 | KRT18P15   | 3  | processed_pseudogene               | keratin 18 pseudogene 15 [Source:HGNC Symbol;Acc:HGNC:11138]                                 |
| 487 | ENSG00000242992 | 1.39E-17 | 5.92165277 | -5.5965168 | 0.04096458 | FTH1P4     | 3  | processed_pseudogene               | ferritin heavy chain 1 pseudogene 4 [Source:HGNC Symbol;Acc:HGNC:11138]                      |
| 488 | ENSG00000145335 | 1.39E-17 | 5.92165277 | -5.5965168 | 0.04096458 | SNCA       | 4  | protein_coding                     | synuclein alpha [Source:HGNC Symbol;Acc:HGNC:11138]                                          |
| 489 | ENSG00000164136 | 1.39E-17 | 5.92165277 | -5.5965168 | 0.04096458 | IL15       | 4  | protein_coding                     | interleukin 15 [Source:HGNC Symbol;Acc:HGNC:5977]                                            |
| 490 | ENSG00000271715 | 1.39E-17 | 5.92165277 | -5.5965168 | 0.04096458 | AC012640.3 | 5  | lincRNA                            | novel transcript                                                                             |
| 491 | ENSG00000250687 | 1.39E-17 | 5.92165277 | -5.5965168 | 0.04096458 | AC146944.2 | 5  | transcribed_unprocessed_pseudogene | NLR family, apoptosis inhibitory protein (NAIP) pseudogene                                   |
| 492 | ENSG00000224431 | 1.39E-17 | 5.92165277 | -5.5965168 | 0.04096458 | AC063976.2 | 5  | processed_pseudogene               | cytoplasmic linker associated protein 2 (CLASP2) pseudogene                                  |
| 493 | ENSG00000202533 | 1.39E-17 | 5.92165277 | -5.5965168 | 0.04096458 | RF00019    | 5  | misc_RNA                           |                                                                                              |
| 494 | ENSG00000285603 | 1.39E-17 | 5.92165277 | -5.5965168 | 0.04096458 | AL035693.1 | 6  | antisense                          | novel transcript, antisense to GMDS                                                          |
| 495 | ENSG00000227758 | 1.39E-17 | 5.92165277 | -5.5965168 | 0.04096458 | AL645939.2 | 6  | unprocessed_pseudogene             | HLA complex group 9 pseudogene 5                                                             |
| 496 | ENSG00000232757 | 1.39E-17 | 5.92165277 | -5.5965168 | 0.04096458 | ETF1P1     | 6  | processed_pseudogene               | eukaryotic translation termination factor 1 pseudogene 1 [Source:HGNC Symbol;Acc:HGNC:11138] |
| 497 | ENSG00000223044 | 1.39E-17 | 5.92165277 | -5.5965168 | 0.04096458 | RNU6-130P  | 6  | snRNA                              | RNA, U6 small nuclear 130, pseudogene [Source:HGNC Symbol;Acc:HGNC:11138]                    |
| 498 | ENSG00000227215 | 1.39E-17 | 5.92165277 | -5.5965168 | 0.04096458 | AL355613.1 | 6  | antisense                          | novel transcript                                                                             |
| 499 | ENSG00000218233 | 1.39E-17 | 5.92165277 | -5.5965168 | 0.04096458 | NEPNP      | 6  | unitary_pseudogene                 | nephrocan, pseudogene [Source:HGNC Symbol;Acc:HGNC:11138]                                    |
| 500 | ENSG00000218757 | 1.39E-17 | 5.92165277 | -5.5965168 | 0.04096458 | AL121952.1 | 6  | processed_pseudogene               | 60S ribosomal protein L17 (RPL17) pseudogene                                                 |
| 501 | ENSG00000226445 | 1.39E-17 | 5.92165277 | -5.5965168 | 0.04096458 | BX322234.1 | 6  | antisense                          | uncharacterized LOC101929523 [Source:NCBI gene;Acc:101929523]                                |
| 502 | ENSG00000215045 | 1.39E-17 | 5.92165277 | -5.5965168 | 0.04096458 | GRID2IP    | 7  | protein_coding                     | Grid2 interacting protein [Source:HGNC Symbol;Acc:HGNC:11138]                                |
| 503 | ENSG00000279785 | 1.39E-17 | 5.92165277 | -5.5965168 | 0.04096458 | AC008267.7 | 7  | TEC                                | TEC                                                                                          |
| 504 | ENSG00000242078 | 1.39E-17 | 5.92165277 | -5.5965168 | 0.04096458 | AC084864.1 | 7  | lincRNA                            | novel transcript                                                                             |
| 505 | ENSG00000235262 | 1.39E-17 | 5.92165277 | -5.5965168 | 0.04096458 | KDM5C-IT1  | X  | sense_intronic                     | KDM5C intronic transcript 1 [Source:HGNC Symbol;Acc:HGNC:11138]                              |
| 506 | ENSG00000228427 | 1.39E-17 | 5.92165277 | -5.5965168 | 0.04096458 | AL590764.1 | X  | antisense                          | uncharacterized LOC107985688 [Source:NCBI gene;Acc:107985688]                                |
| 507 | ENSG00000233260 | 1.39E-17 | 5.92165277 | -5.5965168 | 0.04096458 | RPSAP63    | X  | processed_pseudogene               | ribosomal protein SA pseudogene 63 [Source:HGNC Symbol;Acc:HGNC:11138]                       |
| 508 | ENSG00000246662 | 1.39E-17 | 5.92165277 | -5.5965168 | 0.04096458 | LINC00535  | 8  | antisense                          | long intergenic non-protein coding RNA 535 [Source:HGNC Symbol;Acc:HGNC:11138]               |
| 509 | ENSG00000205143 | 1.39E-17 | 5.92165277 | -5.5965168 | 0.04096458 | ARID3C     | 9  | protein_coding                     | AT-rich interaction domain 3C [Source:HGNC Symbol;Acc:HGNC:11138]                            |
| 510 | ENSG00000135063 | 1.39E-17 | 5.92165277 | -5.5965168 | 0.04096458 | FAM189A2   | 9  | protein_coding                     | family with sequence similarity 189 member A2 [Source:HGNC Symbol;Acc:HGNC:11138]            |
| 511 | ENSG00000230303 | 1.39E-17 | 5.92165277 | -5.5965168 | 0.04096458 | AL353743.2 | 9  | lincRNA                            | novel transcript                                                                             |
| 512 | ENSG00000228069 | 1.39E-17 | 5.92165277 | -5.5965168 | 0.04096458 | MTCO3P29   | 9  | unprocessed_pseudogene             | MT-CO3 pseudogene 29 [Source:HGNC Symbol;Acc:HGNC:5222]                                      |
| 513 | ENSG00000223238 | 1.39E-17 | 5.92165277 | -5.5965168 | 0.04096458 | RNA5SP294  | 9  | rRNA_pseudogene                    | RNA, 5S ribosomal pseudogene 294 [Source:HGNC Symbol;Acc:HGNC:11138]                         |
| 514 | ENSG00000136944 | 1.39E-17 | 5.92165277 | -5.5965168 | 0.04096458 | LMX1B      | 9  | protein_coding                     | LIM homeobox transcription factor 1 beta [Source:HGNC Symbol;Acc:HGNC:11138]                 |
| 515 | ENSG00000255741 | 1.39E-17 | 5.92165277 | -5.5965168 | 0.04096458 | AP000808.2 | 11 | antisense                          | novel transcript                                                                             |
| 516 | ENSG00000251323 | 1.39E-17 | 5.92165277 | -5.5965168 | 0.04096458 | AP003086.1 | 11 | lincRNA                            | uncharacterized LOC101928865 [Source:NCBI gene;Acc:101928865]                                |
| 517 | ENSG00000256452 | 1.39E-17 | 5.92165277 | -5.5965168 | 0.04096458 | AP003170.3 | 11 | antisense                          | novel transcript                                                                             |
| 518 | ENSG00000151963 | 1.39E-17 | 5.92165277 | -5.5965168 | 0.04096458 | ZNF37CP    | 10 | unprocessed_pseudogene             | zinc finger protein 37C, pseudogene [Source:HGNC Symbol;Acc:HGNC:11138]                      |
| 519 | ENSG00000230609 | 1.39E-17 | 5.92165277 | -5.5965168 | 0.04096458 | AL513185.2 | 10 | processed_pseudogene               | cytochrome c oxidase subunit VIIc (COX7C) pseudogene                                         |
| 520 | ENSG00000278459 | 1.39E-17 | 5.92165277 | -5.5965168 | 0.04096458 | RF00017    | 12 | misc_RNA                           |                                                                                              |

|     |                 |          |            |            |            |            |    |                   |                                                             |
|-----|-----------------|----------|------------|------------|------------|------------|----|-------------------|-------------------------------------------------------------|
| 521 | ENSG00000229456 | 1.39E-17 | 5.92165277 | -5.5965168 | 0.04096458 | RLIMP1     | 13 | processed_pseud   | ring finger protein, LIM domain interacting pseudogene 1 [S |
| 522 | ENSG00000229323 | 1.39E-17 | 5.92165277 | -5.5965168 | 0.04096458 | DLEU1-AS1  | 13 | lincRNA           | DLEU1 antisense RNA 1 [Source:HGNC Symbol;Acc:HGNC:5C       |
| 523 | ENSG00000279594 | 1.39E-17 | 5.92165277 | -5.5965168 | 0.04096458 | AL049780.3 | 14 | TEC               | TEC                                                         |
| 524 | ENSG00000258454 | 1.39E-17 | 5.92165277 | -5.5965168 | 0.04096458 | AC016526.2 | 14 | sense_overlappin  | novel transcript, sense overlapping GPATCH2L                |
| 525 | ENSG00000258826 | 1.39E-17 | 5.92165277 | -5.5965168 | 0.04096458 | AL157955.2 | 14 | lincRNA           | uncharacterized LOC101928791 [Source:NCBI gene;Acc:101'     |
| 526 | ENSG00000258858 | 1.39E-17 | 5.92165277 | -5.5965168 | 0.04096458 | AL583722.4 | 14 | antisense         | novel transcript, antisense to INF2                         |
| 527 | ENSG00000104044 | 1.39E-17 | 5.92165277 | -5.5965168 | 0.04096458 | OCA2       | 15 | protein_coding    | OCA2 melanosomal transmembrane protein [Source:HGNC S       |
| 528 | ENSG00000270016 | 1.39E-17 | 5.92165277 | -5.5965168 | 0.04096458 | AC026150.3 | 15 | antisense         | novel transcript, antisense to AC026150.11                  |
| 529 | ENSG00000259845 | 1.39E-17 | 5.92165277 | -5.5965168 | 0.04096458 | HERC2P10   | 15 | unprocessed_pse   | ect domain and RLD 2 pseudogene 10 [Source:HGNC Symb        |
| 530 | ENSG00000274444 | 1.39E-17 | 5.92165277 | -5.5965168 | 0.04096458 | AC078909.2 | 15 | lincRNA           | novel transcript                                            |
| 531 | ENSG00000275672 | 1.39E-17 | 5.92165277 | -5.5965168 | 0.04096458 | AC025580.3 | 15 | antisense         | GATM antisense RNA 1                                        |
| 532 | ENSG00000157470 | 1.39E-17 | 5.92165277 | -5.5965168 | 0.04096458 | FAM81A     | 15 | protein_coding    | family with sequence similarity 81 member A [Source:HGNC    |
| 533 | ENSG00000259649 | 1.39E-17 | 5.92165277 | -5.5965168 | 0.04096458 | AC027808.2 | 15 | antisense         | uncharacterized LOC107984749 [Source:NCBI gene;Acc:107'     |
| 534 | ENSG00000259257 | 1.39E-17 | 5.92165277 | -5.5965168 | 0.04096458 | AC037479.1 | 15 | processed_pseud   | Coiled-coil domain-containing protein 117 (CC117) pseudog   |
| 535 | ENSG00000279136 | 1.39E-17 | 5.92165277 | -5.5965168 | 0.04096458 | AL031258.1 | 16 | TEC               | TEC                                                         |
| 536 | ENSG00000261613 | 1.39E-17 | 5.92165277 | -5.5965168 | 0.04096458 | AC093525.6 | 16 | antisense         | novel transcript, antisense to PDPK1                        |
| 537 | ENSG00000261583 | 1.39E-17 | 5.92165277 | -5.5965168 | 0.04096458 | AC012317.1 | 16 | antisense         | novel transcript                                            |
| 538 | ENSG00000260448 | 1.39E-17 | 5.92165277 | -5.5965168 | 0.04096458 | LCMT1-AS1  | 16 | bidirectional_pro | LCMT1 antisense RNA 1 [Source:HGNC Symbol;Acc:HGNC:51       |
| 539 | ENSG00000270165 | 1.39E-17 | 5.92165277 | -5.5965168 | 0.04096458 | AC010530.1 | 16 | sense_intronic    | novel transcript                                            |
| 540 | ENSG00000260156 | 1.39E-17 | 5.92165277 | -5.5965168 | 0.04096458 | AC020763.1 | 16 | antisense         | novel transcript, antisense to VAC14                        |
| 541 | ENSG00000263219 | 1.39E-17 | 5.92165277 | -5.5965168 | 0.04096458 | RYKP1      | 17 | processed_pseud   | receptor-like tyrosine kinase pseudogene 1 [Source:HGNC Sy  |
| 542 | ENSG00000261868 | 1.39E-17 | 5.92165277 | -5.5965168 | 0.04096458 | MFSD1P1    | 17 | processed_pseud   | major facilitator superfamily domain containing 1 pseudoge  |
| 543 | ENSG00000225751 | 1.39E-17 | 5.92165277 | -5.5965168 | 0.04096458 | AC087501.1 | 17 | antisense         | novel transcript, antisense to STX8                         |
| 544 | ENSG00000108452 | 1.39E-17 | 5.92165277 | -5.5965168 | 0.04096458 | ZNF29P     | 17 | unprocessed_pse   | zinc finger protein 29, pseudogene [Source:HGNC Symbol;Ac   |
| 545 | ENSG00000221540 | 1.39E-17 | 5.92165277 | -5.5965168 | 0.04096458 | MIR1180    | 17 | miRNA             | microRNA 1180 [Source:HGNC Symbol;Acc:HGNC:35261]           |
| 546 | ENSG00000266371 | 1.39E-17 | 5.92165277 | -5.5965168 | 0.04096458 | AC079915.1 | 17 | sense_intronic    | novel transcript, sense intronic NF1                        |
| 547 | ENSG00000262759 | 1.39E-17 | 5.92165277 | -5.5965168 | 0.04096458 | MRPS21P9   | 17 | processed_pseud   | mitochondrial ribosomal protein S21 pseudogene 9 [Source:l  |
| 548 | ENSG00000280233 | 1.39E-17 | 5.92165277 | -5.5965168 | 0.04096458 | AC015813.7 | 17 | TEC               | novel transcript                                            |
| 549 | ENSG00000267302 | 1.39E-17 | 5.92165277 | -5.5965168 | 0.04096458 | RNFT1-DT   | 17 | lincRNA           | RNFT1 divergent transcript [Source:HGNC Symbol;Acc:HGNC     |
| 550 | ENSG00000266943 | 1.39E-17 | 5.92165277 | -5.5965168 | 0.04096458 | RPSAP66    | 17 | processed_pseud   | ribosomal protein SA pseudogene 66 [Source:HGNC Symbol;     |
| 551 | ENSG00000215644 | 1.39E-17 | 5.92165277 | -5.5965168 | 0.04096458 | GCGR       | 17 | protein_coding    | glucagon receptor [Source:HGNC Symbol;Acc:HGNC:4192]        |
| 552 | ENSG00000199719 | 1.39E-17 | 5.92165277 | -5.5965168 | 0.04096458 | RN7SKP74   | 20 | misc_RNA          | RNA, 75K small nuclear pseudogene 74 [Source:HGNC Symb      |
| 553 | ENSG00000278367 | 1.39E-17 | 5.92165277 | -5.5965168 | 0.04096458 | AL356652.1 | 20 | antisense         | novel transcript, antisense to PROCR                        |
| 554 | ENSG00000252933 | 1.39E-17 | 5.92165277 | -5.5965168 | 0.04096458 | RNU6-1223P | 19 | snRNA             | RNA, U6 small nuclear 1223, pseudogene [Source:HGNC Syn     |
| 555 | ENSG00000267611 | 1.39E-17 | 5.92165277 | -5.5965168 | 0.04096458 | AC008521.1 | 19 | processed_pseud   | MAD2 mitotic arrest deficient-like 1 (yeast) (MAD2L1) pseu  |
| 556 | ENSG00000232677 | 1.39E-17 | 5.92165277 | -5.5965168 | 0.04096458 | LINC00665  | 19 | lincRNA           | long intergenic non-protein coding RNA 665 [Source:HGNC S   |
| 557 | ENSG00000171777 | 1.39E-17 | 5.92165277 | -5.5965168 | 0.04096458 | RASGRP4    | 19 | protein_coding    | RAS guanyl releasing protein 4 [Source:HGNC Symbol;Acc:HC   |
| 558 | ENSG00000267375 | 1.39E-17 | 5.92165277 | -5.5965168 | 0.04096458 | AC008649.2 | 19 | antisense         | novel transcript, antisense to ACTN4                        |
| 559 | ENSG00000283673 | 1.39E-17 | 5.92165277 | -5.5965168 | 0.04096458 | MIR4531    | 19 | miRNA             | microRNA 4531 [Source:HGNC Symbol;Acc:HGNC:41872]           |
| 560 | ENSG00000105467 | 1.39E-17 | 5.92165277 | -5.5965168 | 0.04096458 | SYNGR4     | 19 | protein_coding    | synaptogyrin 4 [Source:HGNC Symbol;Acc:HGNC:11502]          |



|     |                 |            |            |            |            |            |    |                                    |                                                                                                   |
|-----|-----------------|------------|------------|------------|------------|------------|----|------------------------------------|---------------------------------------------------------------------------------------------------|
| 561 | ENSG00000221241 | 1.39E-17   | 5.92165277 | -5.5965168 | 0.04096458 | SNORD88A   | 19 | snoRNA                             | small nucleolar RNA, C/D box 88A [Source:HGNC Symbol;Acc:HGNC:32904]                              |
| 562 | ENSG00000207780 | 1.39E-17   | 5.92165277 | -5.5965168 | 0.04096458 | MIR648     | 22 | miRNA                              | microRNA 648 [Source:HGNC Symbol;Acc:HGNC:32904]                                                  |
| 563 | ENSG00000281530 | 1.39E-17   | 5.92165277 | -5.5965168 | 0.04096458 | AC004461.2 | 22 | sense_intronic                     | DiGeorge syndrome critical region gene 12 (non-protein coding)                                    |
| 564 | ENSG00000229955 | 1.39E-17   | 5.92165277 | -5.5965168 | 0.04096458 | Z98749.1   | 22 | sense_intronic                     | novel transcript, sense intronic to CSNK1E                                                        |
| 565 | ENSG00000237609 | 1.39E-17   | 5.92165277 | -5.5965168 | 0.04096458 | AF064858.2 | 21 | lincRNA                            | novel transcript                                                                                  |
| 566 | ENSG00000271732 | 2.02720959 | 10.8572834 | -2.3521894 | 0.04103203 | AL137798.1 | 1  | lincRNA                            | novel transcript                                                                                  |
| 567 | ENSG00000227692 | 2.02720959 | 10.8572834 | -2.3521894 | 0.04103203 | MED28P3    | 2  | processed_pseudogene               | mediator complex subunit 28 pseudogene 3 [Source:HGNC Symbol;Acc:HGNC:32904]                      |
| 568 | ENSG00000238228 | 2.02720959 | 10.8572834 | -2.3521894 | 0.04103203 | OR7E7P     | 7  | unprocessed_pseudogene             | olfactory receptor family 7 subfamily E member 7 pseudogene 1 [Source:HGNC Symbol;Acc:HGNC:32904] |
| 569 | ENSG00000254208 | 2.02720959 | 10.8572834 | -2.3521894 | 0.04103203 | AC011773.1 | 8  | antisense                          | novel transcript, antisense to E2F5                                                               |
| 570 | ENSG00000232684 | 2.02720959 | 10.8572834 | -2.3521894 | 0.04103203 | ATP11A-AS1 | 13 | antisense                          | ATP11A antisense RNA 1 [Source:HGNC Symbol;Acc:HGNC:32904]                                        |
| 571 | ENSG00000258458 | 2.02720959 | 10.8572834 | -2.3521894 | 0.04103203 | AL160314.2 | 14 | processed_transcript               | novel transcript, antisense to OXA1L                                                              |
| 572 | ENSG00000264049 | 2.02720959 | 10.8572834 | -2.3521894 | 0.04103203 | MIR4737    | 17 | miRNA                              | microRNA 4737 [Source:HGNC Symbol;Acc:HGNC:41669]                                                 |
| 573 | ENSG00000143375 | 18.2358728 | 42.4452835 | -1.2133353 | 0.04153513 | CGN        | 1  | protein_coding                     | cingulin [Source:HGNC Symbol;Acc:HGNC:17429]                                                      |
| 574 | ENSG00000125966 | 18.2358728 | 42.4452835 | -1.2133353 | 0.04153513 | MMP24      | 20 | protein_coding                     | matrix metalloproteinase 24 [Source:HGNC Symbol;Acc:HGNC:17429]                                   |
| 575 | ENSG00000260750 | 10.1315311 | 26.6512854 | -1.3846269 | 0.04190398 | AC092720.1 | 16 | lincRNA                            | uncharacterized LOC101928737 [Source:NCBI gene;Acc:101928737]                                     |
| 576 | ENSG00000253958 | 9.11848879 | 24.6770356 | -1.424185  | 0.04281416 | CLDN23     | 8  | protein_coding                     | claudin 23 [Source:HGNC Symbol;Acc:HGNC:17591]                                                    |
| 577 | ENSG00000164764 | 9.11848879 | 24.6770356 | -1.424185  | 0.04281416 | SBSPON     | 8  | protein_coding                     | somatomedin B and thrombospondin type 1 domain containing 1 [Source:HGNC Symbol;Acc:HGNC:17591]   |
| 578 | ENSG00000258604 | 9.11848879 | 24.6770356 | -1.424185  | 0.04281416 | AL161668.4 | 14 | lincRNA                            | novel transcript                                                                                  |
| 579 | ENSG00000166869 | 9.11848879 | 24.6770356 | -1.424185  | 0.04281416 | CHP2       | 16 | protein_coding                     | calcineurin like EF-hand protein 2 [Source:HGNC Symbol;Acc:HGNC:17591]                            |
| 580 | ENSG00000146094 | 37.4836908 | 77.9817766 | -1.0544438 | 0.04340952 | DOK3       | 5  | protein_coding                     | docking protein 3 [Source:HGNC Symbol;Acc:HGNC:24583]                                             |
| 581 | ENSG00000214967 | 22.2880447 | 49.3551573 | -1.1426138 | 0.04363981 | NPIPA7     | 16 | protein_coding                     | nuclear pore complex interacting protein family member A7 [Source:HGNC Symbol;Acc:HGNC:24583]     |
| 582 | ENSG00000229539 | 16.209787  | 37.5096592 | -1.2042531 | 0.04368423 | AL353194.1 | 20 | antisense                          | novel transcript                                                                                  |
| 583 | ENSG00000235750 | 8.10544673 | 22.7027856 | -1.472011  | 0.04369299 | KIAA0040   | 1  | protein_coding                     | KIAA0040 [Source:HGNC Symbol;Acc:HGNC:28950]                                                      |
| 584 | ENSG00000204380 | 8.10544673 | 22.7027856 | -1.472011  | 0.04369299 | PKP4-AS1   | 2  | antisense                          | PKP4 antisense RNA 1 [Source:HGNC Symbol;Acc:HGNC:5251]                                           |
| 585 | ENSG00000205090 | 3.04024516 | 12.8315343 | -2.033924  | 0.04399131 | TMEM240    | 1  | protein_coding                     | transmembrane protein 240 [Source:HGNC Symbol;Acc:HGNC:5251]                                      |
| 586 | ENSG00000270392 | 3.04024516 | 12.8315343 | -2.033924  | 0.04399131 | PFN1P2     | 1  | transcribed_pseudogene             | profilin 1 pseudogene 2 [Source:HGNC Symbol;Acc:HGNC:24583]                                       |
| 587 | ENSG00000187862 | 3.04024516 | 12.8315343 | -2.033924  | 0.04399131 | TTC24      | 1  | protein_coding                     | tetratricopeptide repeat domain 24 [Source:HGNC Symbol;Acc:HGNC:24583]                            |
| 588 | ENSG00000276334 | 3.04024516 | 12.8315343 | -2.033924  | 0.04399131 | AL133243.2 | 2  | sense_intronic                     | novel transcript, sense intronic to BIRC6                                                         |
| 589 | ENSG00000235852 | 3.04024516 | 12.8315343 | -2.033924  | 0.04399131 | AC005540.1 | 2  | antisense                          | novel transcript                                                                                  |
| 590 | ENSG00000102057 | 3.04024516 | 12.8315343 | -2.033924  | 0.04399131 | KCND1      | X  | protein_coding                     | potassium voltage-gated channel subfamily D member 1 [Source:HGNC Symbol;Acc:HGNC:5251]           |
| 591 | ENSG00000107099 | 3.04024516 | 12.8315343 | -2.033924  | 0.04399131 | DOCK8      | 9  | protein_coding                     | dedicator of cytokinesis 8 [Source:HGNC Symbol;Acc:HGNC:5251]                                     |
| 592 | ENSG00000129749 | 3.04024516 | 12.8315343 | -2.033924  | 0.04399131 | CHRNA10    | 11 | protein_coding                     | cholinergic receptor nicotinic alpha 10 subunit [Source:HGNC Symbol;Acc:HGNC:5251]                |
| 593 | ENSG00000200090 | 3.04024516 | 12.8315343 | -2.033924  | 0.04399131 | RF00019    | 11 | misc_RNA                           |                                                                                                   |
| 594 | ENSG00000215146 | 3.04024516 | 12.8315343 | -2.033924  | 0.04399131 | BX322639.1 | 10 | transcribed_unprocessed_pseudogene | zinc finger protein 91 pseudogene [Source:NCBI gene;Acc:44525]                                    |
| 595 | ENSG00000256185 | 3.04024516 | 12.8315343 | -2.033924  | 0.04399131 | AC055720.2 | 12 | 3prime_overlapping_ncRNA           | novel transcript                                                                                  |
| 596 | ENSG00000272848 | 7.09240497 | 20.7285356 | -1.5310368 | 0.04448909 | AL135910.1 | 6  | lincRNA                            | novel transcript                                                                                  |
| 597 | ENSG00000261067 | 7.09240497 | 20.7285356 | -1.5310368 | 0.04448909 | AC109460.3 | 16 | processed_transcript               | novel transcript                                                                                  |
| 598 | ENSG00000196569 | 6.07936364 | 18.7542855 | -1.6057905 | 0.04511747 | LAMA2      | 6  | protein_coding                     | laminin subunit alpha 2 [Source:HGNC Symbol;Acc:HGNC:64525]                                       |
| 599 | ENSG00000278390 | 6.07936364 | 18.7542855 | -1.6057905 | 0.04511747 | AL354696.2 | 13 | antisense                          | uncharacterized LOC101929140 [Source:NCBI gene;Acc:101929140]                                     |
| 600 | ENSG00000260367 | 6.07936364 | 18.7542855 | -1.6057905 | 0.04511747 | AC109460.1 | 16 | antisense                          | novel transcript, antisense to SPNS1                                                              |



|     |                 |            |            |            |            |            |    |                  |                                                                  |
|-----|-----------------|------------|------------|------------|------------|------------|----|------------------|------------------------------------------------------------------|
| 601 | ENSG00000183054 | 4.05328324 | 14.8057849 | -1.8377989 | 0.04520218 | RGPD6      | 2  | protein_coding   | RANBP2-like and GRIP domain containing 6 [Source:HGNC Sy         |
| 602 | ENSG00000248103 | 4.05328324 | 14.8057849 | -1.8377989 | 0.04520218 | AC008443.2 | 5  | lincRNA          | novel transcript                                                 |
| 603 | ENSG00000261553 | 4.05328324 | 14.8057849 | -1.8377989 | 0.04520218 | AL137782.1 | 13 | processed_transc | novel transcript                                                 |
| 604 | ENSG00000006047 | 4.05328324 | 14.8057849 | -1.8377989 | 0.04520218 | YBX2       | 17 | protein_coding   | Y-box binding protein 2 [Source:HGNC Symbol;Acc:HGNC:179         |
| 605 | ENSG00000268543 | 4.05328324 | 14.8057849 | -1.8377989 | 0.04520218 | AC012313.4 | 19 | TEC              | novel transcript                                                 |
| 606 | ENSG00000224959 | 5.06632294 | 16.7800353 | -1.7036813 | 0.04543596 | AC017002.1 | 2  | lincRNA          | novel transcript                                                 |
| 607 | ENSG00000261051 | 5.06632294 | 16.7800353 | -1.7036813 | 0.04543596 | AC107021.2 | 3  | sense_overlappin | novel transcript, overlapping to PLOD2                           |
| 608 | ENSG00000184923 | 5.06632294 | 16.7800353 | -1.7036813 | 0.04543596 | NUTM2A     | 10 | protein_coding   | NUT family member 2A [Source:HGNC Symbol;Acc:HGNC:234            |
| 609 | ENSG00000197813 | 5.06632294 | 16.7800353 | -1.7036813 | 0.04543596 | AC011450.1 | 19 | lincRNA          | novel transcript                                                 |
| 610 | ENSG00000239665 | 35.4576046 | 72.0590278 | -1.0205737 | 0.0460164  | AL157392.3 | 10 | processed_transc | novel transcript                                                 |
| 611 | ENSG00000203709 | 38.4967339 | 78.9689014 | -1.0342143 | 0.04666866 | MIR29B2CHG | 1  | lincRNA          | MIR29B2 and MIR29C host gene [Source:HGNC Symbol;Acc:HGNC:2327   |
| 612 | ENSG00000204524 | 42.5489064 | 85.8787749 | -1.0111011 | 0.04718722 | ZNF805     | 19 | protein_coding   | zinc finger protein 805 [Source:HGNC Symbol;Acc:HGNC:2327        |
| 613 | ENSG00000225422 | 24.3141307 | 52.3165317 | -1.1016116 | 0.04740969 | RBMS1P1    | 12 | processed_pseud  | RNA binding motif single stranded interacting protein 1 pseu     |
| 614 | ENSG00000170092 | 13.1706587 | 31.58691   | -1.2542385 | 0.04754413 | SPDYE5     | 7  | protein_coding   | speedy/RINGO cell cycle regulator family member E5 [Source       |
| 615 | ENSG00000157999 | 18.2358728 | 40.4710338 | -1.1448291 | 0.04859715 | ANKRD61    | 7  | protein_coding   | ankyrin repeat domain 61 [Source:HGNC Symbol;Acc:HGNC:2          |
| 616 | ENSG00000233230 | 32.4184753 | 66.136279  | -1.02587   | 0.04913111 | AC079807.1 | 2  | antisense        | novel transcript                                                 |
| 617 | ENSG00000214855 | 32.4184753 | 66.136279  | -1.02587   | 0.04913111 | APOC1P1    | 19 | transcribed_unpr | apolipoprotein C1 pseudogene 1 [Source:HGNC Symbol;Acc:HGNC:2327 |
